# Supplementary material for: Population knowledge, attitudes and practices towards malaria prevention in the locality of Makenene, Centre-Cameroon
Source: Malar J. 2022 Aug 5;21:234. doi: 10.1186/s12936-022-04253-z (PMC9356395; doi:10.1186/s12936-022-04253-z)
Supplement: Supplementary file 1 — Additional file 1. Questionnaire. [file 12936_2022_4253_MOESM1_ESM.pdf]

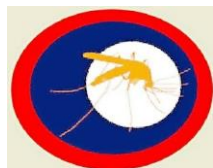

## FICHE D'ENQUETE MENAGE SUR LE PALUDISME A MAKENENE

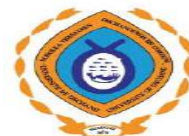

**Investigateurs :** - Dr Bamou Roland (Université de Dschang ; tel : 655101080)

Djoufounna Joël (Université de Dschang ; tel : 657383259)

### **But : Identifier les paramètres comportementaux modulant le niveau de transmission du paludisme**

Les informations collectées au cours de cette enquête sont strictement confidentielles au terme de la Loi N°91/023 du 16 Décembre 1991 sur les Recensements et Enquêtes Statistiques qui stipulent en son article 5 que « les renseignements individuels, d'ordre économique, et/ ou financier figurant sur tout questionnaire d'enquête statistique ne peuvent en aucun cas être utilisés à des fins de contrôle ou de répression économique »

### **IDENTIFICATION**

|      |                                                         |                                                                                    |                                          |
|------|---------------------------------------------------------|------------------------------------------------------------------------------------|------------------------------------------|
| 0.1  | Date                                                    | _ _ / _ _ /2021                                                                    |                                          |
| 0.2  | Enquêteur/numéro du questionnaire                       |                                                                                    | _ _                                      |
| 0.3  | Localité/Quartier                                       |                                                                                    | _ _                                      |
| 0.4  | N° Maison                                               |                                                                                    | _ _                                      |
| 0.5  | Coordonnées GPS                                         | A. Latitude<br>B. Longitude                                                        | _ _ _ _ _ _ _ _ _ <br> _ _ _ _ _ _ _ _ _ |
| 0.6  | Sexe du chef de ménage/Age                              | A. Masculin  _ <br>B. Féminin  _                                                   | Age  _ _ _                               |
| 0.7  | Profession du chef de ménage/famille                    | _____                                                                              |                                          |
| 0.8  | Statut matrimoniale                                     | A. Marié  _ _                                                                      | B. Célibataire  _ _                      |
| 0.9  | Niveau d'étude du chef de ménage/famille                | A. Université  _ _ ; B. Secondaire _ _  ;<br>C. Primaire  _ _ ; D. Sans niveau _ _ |                                          |
| 0.10 | Religion du chef de ménage                              | A. Musulman  _ _  ; B. Chrétien  _ _ ;<br>C. Autres  _____                         |                                          |
| 0.11 | Le répondant est-il le chef du ménage?                  | A. Oui  _ _  B. Non  _ _                                                           |                                          |
| 0.12 | Niveau d'étude du répondant                             | A. Université  _ _ ; B. Secondaire  _ _ ;<br>B. Primaire  _ _ ; D. Sans niveau _ _ |                                          |
| 0.13 | Sexe du répondant                                       | A. Masculin  _ _  B. Féminin  _ _                                                  |                                          |
| 0.14 | Quel est le nombre de personnes vivant dans la maison ? | A. Effectif total  _____ <br>B. Enfants de moins de 5 ans  _____                   |                                          |

### **CONNAISSANCES, ATTITUDES, PRATIQUES VIS-À-VIS DU PALUDISME**

|     |                                                                                                 |                                                                                                          |
|-----|-------------------------------------------------------------------------------------------------|----------------------------------------------------------------------------------------------------------|
| 1.1 | Connaissez-vous le paludisme ? Oui  _ _  ;<br>Non  _ _ . Si oui , où avez-vous entendu parler ? | A . Radio  _ _  ; B. Télévision  _ _  ;<br>C. Réseaux sociaux  _ _  D. Ecole  _ _  ;<br>E. Autres  _____ |
|-----|-------------------------------------------------------------------------------------------------|----------------------------------------------------------------------------------------------------------|

|      |                                                                                                                   |                                                                                                                                                                                                                                         |
|------|-------------------------------------------------------------------------------------------------------------------|-----------------------------------------------------------------------------------------------------------------------------------------------------------------------------------------------------------------------------------------|
| 1.2  | D'après vous qu'est ce qui transmet le paludisme à l'homme ?                                                      | _____                                                                                                                                                                                                                                   |
| 1.3  | Les moustiques vous piquent-ils dans votre maison ?                                                               | A. Oui  ___  ;                      B. Non  ___                                                                                                                                                                                         |
| 1.4  | A quel moment vous piquent-ils ? Préciser l'heure                                                                 | A.. Matin  _____  ;                      B. En journée  _____  ;<br>C. En soirée  _____  ;                      D. La nuit  _____                                                                                                       |
| 1.5. | Que faites-vous en général à ce moment ?                                                                          | _____                                                                                                                                                                                                                                   |
| 1.6  | Quelle(s) est (sont) alors la (les) mesure(s) de protection que vous utilisez contre les piqûres des moustiques ? | A. Moustiquaires  ___ <br>B. Grilles anti moustiques aux fenêtres  ___ <br>C. Repellents  ___ <br>D. Ventilateur  ___ <br>E. Spirales  ___ <br>F. Pulvérisation d'insecticides  ___ <br>G. Climatiser  ___ <br>Autre (à préciser) _____ |
| 1.7  | Si vous utilisez une moustiquaire, à quelle période l'utilisez-vous plus ?                                        | A .Saison des pluies  ___  ;                      B. Saison sèche  ___  ;<br>C . Régulièrement  ___  ;<br>D .Autre (à préciser) _____                                                                                                   |
| 1.8  | Depuis combien de temps avez-vous votre (vos) moustiquaire (s) ?                                                  | A .Moins de 6 mois  ___  ;                      B. Plus de 6 mois  ___  ;<br>C . Plus d'un an  ___  ;                      D. Plus de 2 ans  ___  ;                                                                                     |
| 1.9  | Comment avez-vous obtenu votre (vos) moustiquaire (s) ?                                                           | A . Distribution du MINSANTE  ___  ;<br>B . Achat  ___  ;<br>C . Don (autre que le MINSANTE)  ___  ;<br>D .Autre à préciser _____                                                                                                       |
| 1.10 | Marque de votre moustiquaire ?                                                                                    | _____                                                                                                                                                                                                                                   |
| 1.11 | Tous les lits à la maison ont-ils des moustiquaires imprégnées ?                                                  | A .Oui  ___                       B. Non  ___                                                                                                                                                                                           |
| 1.12 | Combien de moustiquaires avez-vous ?                                                                              | _____                                                                                                                                                                                                                                   |
| 1.13 | Combien de chambres compte votre maison ?                                                                         | _____                                                                                                                                                                                                                                   |
| 1.14 | Combien de lits avez-vous ? (unité de couchage)                                                                   | _____                                                                                                                                                                                                                                   |

|      |                                                                                                |                                                                                                                                                          |
|------|------------------------------------------------------------------------------------------------|----------------------------------------------------------------------------------------------------------------------------------------------------------|
| 1.15 | Quels sont ceux qui dorment régulièrement sous une moustiquaire à la maison ?                  | A. Tout le monde  ___ <br>B. Parents  ___ <br>C. Tous les enfants  ___ <br>D. Enfant de <5ans  ___ <br>E. Visiteurs  ___ <br>F. Autre (à préciser) _____ |
| 1.16 | Parmi les réponses de la question précédente, qui a dormi sous moustiquaire la nuit dernière ? | A. Tout le monde  ___ <br>B. Parents  ___ <br>C. Tous les enfants  ___ <br>D. Enfant de <5ans  ___ <br>E. Visiteurs  ___ <br>F. Autre (à préciser) _____ |
| 1.17 | Ceux qui n'utilisent pas la moustiquaire ne le font pas pourquoi ?                             | A. Oubli  ___  ;      B. Chaleur  ___  ;<br>C. Pas de moustiques à la maison  ___  ;<br>D. Autre (à préciser) _____                                      |
| 1.14 | Niveau de délabrement de votre (vos) moustiquaire(s) ?                                         | A. En bon état (sans trous)  ___  ;<br>B. Endommagée(s) (présence des trous)  ___  ;                                                                     |
| 1.15 | Pensez-vous réellement que les moustiquaires protègent contre le paludisme ?                   | A. Oui  ___  ;<br>B. Non  ___  :pourquoi ? _____                                                                                                         |
| 1.16 | Selon vous quels sont les symptômes du paludisme ?                                             | Citer :                                                                                                                                                  |
| 1.17 | Que faites-vous quand vous suspectez un cas de paludisme ?                                     | A. Hôpital pour consultation  ___  ;<br>B. Automédication  ___  ;<br>C. Pharmacopée traditionnelle  ___                                                  |
| 1.18 | Combien de fois avez-vous souffert du paludisme cette année ?                                  | A. Moins de 2 fois  ___  ;      B. Plus de 2 fois  ___                                                                                                   |

### ACTIVITES NOCTURNES

|     |                                                                                             |                                                                                                   |
|-----|---------------------------------------------------------------------------------------------|---------------------------------------------------------------------------------------------------|
| 2.1 | Les activités nocturnes de la famille (Lister les activités)<br><b>Nb : à partir de 19h</b> | Femmes _____<br>_____<br>Hommes _____<br>_____<br>Garçons _____<br>_____<br>Filles _____<br>_____ |
|-----|---------------------------------------------------------------------------------------------|---------------------------------------------------------------------------------------------------|
