# Supplementary material for: Population knowledge, attitudes and practices towards malaria prevention in the locality of Makenene, Centre-Cameroon
Source: Malar J. 2022 Aug 5;21:234. doi: 10.1186/s12936-022-04253-z (PMC9356395; doi:10.1186/s12936-022-04253-z)
Supplement: Supplementary file 2 — Additional file 2. Data base. [file 12936_2022_4253_MOESM2_ESM.xlsx]

## Sheet: Data base
Code	Quartier	Sexe du CM	Proféssion du CM	Age du CM	Statut Matri	Niveau d'étude CM	Réligion du CM	Repondant est il le CM ?	Niveau d'étude Rpd	Sexe du repondant	Nbre de personne dans la maison	Enfants<5 ans	Connaissance palu	Paludisme à la Radio	Paludisme à la télé	Paludisme sur les réseaux sociaux	Paludisme à l'école	Paludisme à l'hopital	Paludisme au Quartier	Oui sources	Moustique vecteur	Anophèle Vecteur	Eaux sales/Stagnantes vecteurs	Aucune idée du Vecteur	Oui vecteurs	Moustiques vous piquent-ils?	Periode de piqure(Oui)	Periode de piqure	Periode de piqure	Moustiquaires comme mesures de protection	Spirales comme mesures de protection	Pulvérisations comme mesure de protection	Oui mesures de protection	Période d'utilisation de la moustiquaire	Age MILDA	Origine de la MILDA	MILDA sur tous les lits	Nombre de MILDA	Nombre de chambre	Nombre de lits	Tout le monde dors sous MILDA	Parents dorment sous MILDA?	Enfants> 5ans dorment sous MILDA	Enfants < ans dorment sous MILDA	Qui a dormi sous MILDA-hier?	Non utilisation de la MILDA ?	Etat de la MILDA	MILDA protège t-elle?	connaissance symptomes
1	Ecole publique	Féminin	Petits business	50	Marié	Secondaire	Chretien	Oui	Secondaire	Féminin	4	1	Oui	Non	Non	Oui	Oui	Non	Non	Non	Oui	Non	Non	Non	Non	Oui	Oui	Non	Non	Non	Oui	Non	Non	Régulièrement	plus de 2 ans	Achat	Non	0	3	3	Non	Non	Non	Non	Personne	Ras	RAS	Oui	mauvaises
2	Ecole publique	Masculin	Agriculteur	36	Marié	Secondaire	Musulman	Oui	Secondaire	Masculin	6	1	Oui	Non	Non	Non	Oui	Non	Non	Non	Oui	Non	Non	Non	Non	Oui	Oui	Non	Non	Oui	Non	Non	Oui	Régulièrement	plus de 2 ans	Achat	Oui	3	6	6	Non	Non	Non	Oui	D	C	Endommagée	Oui	bonne
3	Ecole publique	Masculin	Petits business	28	Marié	Primaire	Chretien	Non	Sans niveau	Féminin	2	0	Oui	Non	Non	Non	Non	Non	Non	Oui	non	Non	Oui	Non	Non	Oui	Oui	Non	Non	Oui	Non	Non	Non	Régulièrement	plus de 2 ans	MINSANTE	Non	1	2	2	Non	Oui	Non	Non	B	C	Bon état	Oui	mauvaises
4	Ecole publique	Féminin	Petits business	30	Marié	Secondaire	Chretien	Non	Secondaire	Féminin	4	0	Oui	Non	Non	Non	Non	Non	Non	Oui	Oui	Non	Non	Non	Non	Oui	Oui	Non	Non	Oui	Non	Non	Non	Saison pluvieuse	Plus de 6 mois	Don autre MINSANTE	Oui	7	6	6	Oui	Non	Non	Non	A	C	Endommagée	Oui	mauvaises
5	Ecole publique	Masculin	fonctionnaire	50	Marié	Secondaire	Chretien	Non	Secondaire	Féminin	7	2	Oui	Oui	Oui	Oui	Non	Oui	Non	Non	Oui	Non	Non	Non	Non	Oui	Oui	Non	Non	Oui	Non	Oui	Non	Régulièrement	plus de 2 ans	Achat	Non	2	3	4	Non	Non	Non	Oui	Personne	A	Endommagée	Oui	moyenne
6	Ecole publique	Masculin	Agriculteur	49	Marié	Université	Chretien	Oui	Universté	Masculin	8	1	Oui	Oui	Oui	Non	Oui	Non	Non	Non	Oui	Non	Non	Non	Non	Oui	Oui	Non	Non	Oui	Non	Non	Non	Saison pluvieuse	Plus d'1an	MINSANTE	Non	2	4	4	Non	Non	Non	Oui	D	B	Endommagée	Oui	bonne
7	Ecole publique	Féminin	Ménagère	37	Célibataire	Secondaire	Chretien	Oui	Secondaire	Féminin	3	1	Oui	Non	Non	Non	Oui	Non	Non	Non	non	Non	Non	Non	Oui	Oui	Oui	Non	Non	Oui	Non	Non	Non	Régulièrement	plus de 2 ans	MINSANTE	Oui	2	2	2	Oui	Oui	Non	Non	A	B	Endommagée	Oui	moyenne
8	Ecole publique	Masculin	Agriculteur	64	Marié	Secondaire	Chretien	Non	Secondaire	Masculin	10	0	Oui	Non	Non	Non	Oui	Non	Non	Non	Oui	Non	Non	Non	Non	Oui	Oui	Non	Non	Oui	Non	Non	Oui	Saison pluvieuse	Moins de 6 mois	MINSANTE	Non	2	7	7	Non	Non	Oui	Oui	D	A	Endommagée	Oui	bonne
9	Ecole publique	Féminin	Ménagère	48	Marié	Primaire	Chretien	Non	Secondaire	Féminin	10	1	Oui	Non	Non	Non	Oui	Non	Non	Non	Oui	Non	Non	Non	Non	Oui	Oui	Non	Non	Oui	Non	Non	Non	Saison pluvieuse	Plus d'1an	MINSANTE	Non	3	6	8	Non	Non	Non	Non	C	C	Bon état	Oui	moyenne
10	Ecole publique	Masculin	Agriculteur	36	Marié	Primaire	Chretien	Oui	Secondaire	Masculin	12	3	Oui	Non	Non	Non	Oui	Non	Non	Non	Oui	Non	Non	Non	Non	Oui	Oui	Non	Non	Oui	Non	Non	Non	Régulièrement	plus de 2 ans	MINSANTE	Oui	4	4	4	Oui	Oui	Non	Non	A	B	Bon état	Oui	moyenne
11	Ecole publique	Masculin	Agriculteur	49	Marié	Université	Chretien	Non	Universté	Masculin	9	1	Oui	Non	Non	Non	Oui	Non	Non	Non	Oui	Non	Non	Non	Non	Oui	Oui	Oui	Oui	Oui	Non	Oui	Oui	Saison pluvieuse	Plus de 6 mois	MINSANTE	Non	2	4	4	Non	Oui	Non	Non	D	B	Bon état	Non	moyenne
12	Ecole publique	Masculin	Agriculteur	64	Marié	Secondaire	Chretien	Non	Secondaire	Masculin	10	0	Oui	Non	Non	Non	Oui	Non	Non	Non	Oui	Non	Non	Non	Non	Oui	Oui	Non	Non	Oui	Non	Non	Non	Saison pluvieuse	Plus d'1an	MINSANTE	Non	2	6	7	Non	Non	Non	Non	B	C	Bon état	Oui	bonne
13	Ecole publique	Féminin	Ménagère	66	Marié	Secondaire	Chretien	Non	Secondaire	Masculin	2	0	Oui	Non	Non	Non	Oui	Non	Non	Non	Oui	Non	Non	Non	Non	Oui	Oui	Non	Non	Oui	Non	Non	Non	Régulièrement	Plus d'1an	Achat	Oui	2	4	4	Oui	Non	Non	Non	A	B	Endommagée	Oui	mauvaises
14	Ecole publique	Féminin	Ménagère	40	Célibataire	Secondaire	Chretien	Non	Primaire	Féminin	3	0	Oui	Non	Oui	Non	Non	Non	Non	Non	non	Non	Non	Non	Oui	Oui	Oui	Non	Non	Oui	Non	Non	Oui	Saison pluvieuse	Moins de 6 mois	MINSANTE	Oui	3	3	3	Oui	Non	Non	Non	A	A	Bon état	Oui	moyenne
15	Ecole publique	Féminin	Petits business	37	Célibataire	Secondaire	Chretien	Oui	Secondaire	Féminin	4		Oui	Non	Oui	Non	Non	Non	Non	Non	Oui	Non	Non	Non	Non	Oui	Non	Oui	Non	Oui	Non	Non	Non	Régulièrement	Plus de 6 mois	MINSANTE	Non	2	3	3	Non	Non	Oui	Non	C	C	Endommagée	Oui	moyenne
16	Ecole publique	Féminin	Petits business	48	Marié	Université	Chretien	Non	Universté	Masculin	6	1	Oui	Non	Oui	Non	Oui	Non	Non	Non	Oui	Oui	Non	Non	Non	Oui	Oui	Non	Non	Oui	Non	Non	Oui	Régulièrement	plus de 2 ans	Don autre MINSANTE	Non	1	5	6	Non	Non	Non	Oui	D	C	Endommagée	Oui	moyenne
17	Ecole publique	Masculin	Agriculteur	64	Célibataire	Secondaire	Paien	Non	Secondaire	Masculin	10	0	Oui	Non	Non	Non	Oui	Non	Non	Non	Oui	Oui	Non	Non	Non	Oui	Oui	Non	Non	Non	Non	Non	Oui	Non	plus de 2 ans	Don autre MINSANTE	Non	1	6	7	Non	Non	Non	Oui	D	C	Endommagée	Oui	moyenne
18	Ecole publique	Masculin	Petits business	47	Marié	Secondaire	Chretien	Non	Secondaire	Masculin	6	1	Oui	Non	Non	Non	Oui	Non	Non	Non	Oui	Oui	Non	Non	Non	Oui	Oui	Oui	Non	Non	Non	Non	Oui	Non	RAS	Non	Non	0	5	6	Non	Non	Non	Non	Personne	Ras	RAS	Oui	moyenne
19	Ecole publique	Masculin	Petits business	79	Marié	Secondaire	Chretien	Oui	Secondaire	Masculin	10	4	Oui	Non	Oui	Non	Non	Non	Non	Non	Oui	Non	Non	Non	Non	Oui	Oui	Non	Non	Oui	Non	Non	Non	Régulièrement	plus de 2 ans	Don autre MINSANTE	Non	2	3	3	Non	Non	Oui	Non	C	C	Endommagée	Oui	bonne
20	Ecole publique	Masculin	student	22	Célibataire	Secondaire	Chretien	Oui	Secondaire	Masculin	2	0	Oui	Non	Non	Non	Oui	Non	Non	Non	Oui	Non	Non	Non	Non	Oui	Oui	Non	Non	Non	Non	Non	Oui	Non	RAS	Non	Non	0	1	1	Non	Non	Non	Non	Personne	C	RAS	Oui	moyenne
21	Ecole publique	Masculin	Agriculteur	53	Marié	Primaire	Chretien	Oui	Primaire	Masculin	6	0	Oui	Non	Oui	Non	Non	Non	Non	Non	Oui	Non	Non	Non	Non	Oui	Non	Oui	Non	Oui	Non	Non	Oui	Régulièrement	Plus de 6 mois	MINSANTE	Non	3	4	4	Non	Non	Oui	Non	C	C	Bon état	Oui	moyenne
22	Ecole publique	Féminin	Ménagère	32	Marié	Secondaire	Chretien	Non	Secondaire	Féminin	3	0	Oui	Non	Oui	Non	Non	Non	Non	Non	Oui	Non	Non	Non	Non	Oui	Oui	Non	Non	Oui	Non	Non	Non	Saison pluvieuse	Moins de 6 mois	MINSANTE	Non	1	2	2	Non	Non	Oui	Non	C	C	Endommagée	Oui	mauvaises
23	Ecole publique	Masculin	Agriculteur	60	Marié	Université	Chretien	Non	Secondaire	Féminin	7	1	Oui	Non	Non	Non	Oui	Non	Non	Non	Oui	Non	Non	Non	Oui	Oui	Oui	Oui	Oui	Oui	Non	Oui	Non	Régulièrement	Moins de 6 mois	MINSANTE	Oui	4	4	4	Oui	Non	Non	Non	A	B	Bon état	Oui	moyenne
24	Ecole publique	Masculin	Agriculteur	45	Célibataire	Secondaire	Chretien	Non	Secondaire	Féminin	2	0	Oui	Non	Non	Non	Oui	Non	Non	Non	Oui	Non	Non	Non	Non	Non	Oui	Non	Non	Oui	Non	Non	Non	Saison pluvieuse	Moins de 6 mois	MINSANTE	Oui	2	2	2	Non	Oui	Non	Non	B	B	Bon état	Oui	moyenne
25	Ecole publique	Féminin	Ménagère	54	Marié	Primaire	Chretien	Non	Secondaire	Féminin	5	0	Oui	Non	Oui	Non	Non	Non	Non	Non	Oui	Non	Non	Non	Non	Oui	Oui	Non	Non	Oui	Non	Non	Non	Saison pluvieuse	Moins de 6 mois	MINSANTE	Oui	3	3	3	Oui	Non	Non	Non	A	B	Bon état	Oui	moyenne
26	Ecole publique	Féminin	Ménagère	47	Marié	Secondaire	Chretien	Oui	Secondaire	Féminin	3	0	Oui	Non	Oui	Non	Non	Non	Non	Non	Oui	Non	Non	Non	Non	Oui	Oui	Non	Non	Oui	Non	Non	Non	Saison pluvieuse	Plus de 6 mois	MINSANTE	Non	1	2	2	Non	Non	Oui	Non	C	C	Endommagée	Oui	mauvaises
27	Ecole publique	Féminin	fonctionnaire	35	Célibataire	Université	Chretien	Non	Secondaire	Masculin	5	1	Oui	Non	Non	Non	Oui	Non	Non	Non	Oui	Non	Non	Non	Non	Oui	Oui	Non	Non	Oui	Non	Non	Oui	Régulièrement	plus de 2 ans	MINSANTE	Non	2	4	4	Non	Non	Non	Oui	D	C	Endommagée	Oui	bonne
28	Ecole publique	Masculin	Agriculteur	38	Célibataire	Secondaire	Chretien	Non	Secondaire	Féminin	2	0	Oui	Non	Non	Non	Oui	Non	Non	Non	Oui	Non	Non	Non	Non	Oui	Oui	Non	Non	Oui	Non	Non	Oui	Saison pluvieuse	Moins de 6 mois	MINSANTE	Oui	1	2	2	Non	Oui	Non	Non	B	B	Endommagée	Oui	mauvaises
29	Ecole publique	Masculin	Agriculteur	58	Marié	Secondaire	Chretien	Oui	Secondaire	Masculin	8	0	Oui	Non	Oui	Non	Non	Non	Non	Non	Oui	Non	Non	Non	Non	Oui	Oui	Non	Non	Oui	Non	Non	Non	Saison pluvieuse	Plus d'1an	MINSANTE	Non	1	6	6	Non	Non	Oui	Non	Personne	C	Endommagée	Oui	mauvaises
30	Ecole publique	Féminin	Petits business	30	Célibataire	Secondaire	Chretien	Oui	Secondaire	Féminin	4	0	Oui	Non	Oui	Non	Non	Non	Non	Non	Oui	Non	Non	Non	Non	Oui	Oui	Non	Non	Oui	Non	Non	Non	Saison pluvieuse	Plus de 6 mois	MINSANTE	Non	1	3	3	Non	Oui	Non	Non	Personne	B,C	Endommagée	Oui	mauvaises
31	Ecole publique	Masculin	Agriculteur	40	Marié	Secondaire	Chretien	Oui	Secondaire	Masculin	10	3	Oui	Non	Oui	Non	Non	Non	Non	Non	Oui	Non	Non	Non	Non	Oui	Oui	Non	Non	Oui	Non	Non	Non	Régulièrement	plus de 2 ans	MINSANTE	Non	2	3	5	Non	Non	Non	Oui	D	C	Endommagée	Oui	bonne
32	Ecole publique	Masculin	Agriculteur	46	Marié	Secondaire	Chretien	Non	Secondaire	Masculin	17	5	Oui	Oui	Oui	Non	Non	Non	Non	Non	Oui	Non	Non	Non	Non	Oui	Oui	Non	Non	Oui	Non	Non	Non	Régulièrement	plus de 2 ans	MINSANTE	Non	3	5	9	Non	Non	Non	Oui	D	C	Endommagée	Oui	moyenne
33	Ecole publique	Masculin	student	25	Célibataire	Secondaire	Chretien	Oui	Secondaire	Masculin	1	0	Oui	Non	Non	Non	Oui	Non	Non	Non	Oui	Non	Non	Non	Non	Oui	Oui	Non	Non	Non	Non	Non	Oui	Non	RAS	Non	Non	0	2	1	Non	Non	Non	Non	Personne	B,C	Endommagée	Oui	bonne
34	Ecole publique	Masculin	Agriculteur	42	Marié	Secondaire	Chretien	Non	Secondaire	Masculin	4	0	Oui	Non	Non	Non	Oui	Non	Non	Non	Oui	Non	Non	Non	Non	Oui	Non	Oui	Non	Oui	Non	Non	Oui	Régulièrement	Plus de 6 mois	MINSANTE	Non	3	5	5	Oui	Non	Non	Non	A	B	Bon état	Oui	moyenne
35	Ecole publique	Masculin	Agriculteur	53	Marié	Primaire	Chretien	Non	Secondaire	Masculin	14	0	Oui	Non	Oui	Non	Non	Non	Non	Non	Oui	Non	Non	Non	Non	Oui	Oui	Non	Non	Oui	Non	Non	Non	Régulièrement	Plus d'1an	MINSANTE	Non	4	4	6	Non	Non	Oui	Non	C	C	Endommagée	Oui	bonne
36	Ecole publique	Féminin	Agriculteur	65	Veuve	Sans niveau	Paien	Oui	Sans niveau	Féminin	3	0	Oui	Non	Non	Non	Non	Oui	Non	Non	Oui	Non	Non	Non	Non	Oui	Oui	Non	Non	Oui	Non	Non	Non	Saison pluvieuse	plus de 2 ans	MINSANTE	Non	1	2	2	Non	Oui	Non	Non	B	C	Bon état	Oui	mauvaises
37	Ecole publique	Masculin	Petits business	31	Marié	Secondaire	Chretien	Oui	Secondaire	Masculin	4	1	Oui	Non	Oui	Non	Non	Non	Oui	Non	Oui	Oui	Non	Non	Non	Non	Oui	Non	Non	Oui	Non	Non	Non	Régulièrement	plus de 2 ans	MINSANTE	Oui	1	1	1	Oui	Non	Non	Non	A	B	Bon état	Oui	bonne
38	Ecole publique	Masculin	Petits business	42	Célibataire	Primaire	Paien	Oui	Primaire	Masculin	3	0	Oui	Non	Oui	Non	Non	Non	Non	Non	Oui	Non	Non	Non	Non	Non	Oui	Non	Non	Oui	Oui	Oui	Oui	Régulièrement	Plus d'1an	MINSANTE	Oui	2	2	2	Oui	Non	Non	Non	A	A,C	Endommagée	Oui	moyenne
39	Ecole publique	Masculin	Agriculteur	46	Divorcé	Primaire	Chretien	Oui	Primaire	Masculin	2	0	Oui	Oui	Oui	Non	Non	Non	Non	Non	Oui	Non	Non	Non	Non	Oui	Oui	Oui	Non	Non	Non	Oui	Oui	Non	RAS	Non	Non	0	1	1	Non	Non	Non	Non	Personne	C	RAS	Oui	moyenne
40	Ecole publique	Masculin	Petits business	52	Marié	Primaire	Musulman	Non	Secondaire	Féminin	9	0	Oui	Non	Non	Non	Oui	Non	Non	Non	Oui	Non	Non	Non	Non	Oui	Oui	Non	Non	Oui	Non	Non	Non	Saison pluvieuse	plus de 2 ans	MINSANTE	Non	1	6	6	Non	Oui	Non	Non	Personne	C	Endommagée	Oui	moyenne
41	Ecole publique	Masculin	fonctionnaire	62	Marié	Université	Chretien	Non	Universté	Masculin	4	0	Oui	Non	Non	Non	Oui	Non	Non	Non	Oui	Non	Non	Non	Non	Oui	Oui	Non	Non	Oui	Non	Oui	Oui	Régulièrement	Plus d'1an	MINSANTE	Oui	2	2	2	Oui	Non	Non	Non	A	A,B	Bon état	Oui	moyenne
42	Ecole publique	Masculin	Petits business	45	Célibataire	Secondaire	Chretien	Oui	Secondaire	Féminin	4	0	Oui	Non	Non	Non	Oui	Non	Non	Non	Oui	Non	Non	Non	Non	Oui	Oui	Non	Non	Oui	Non	Non	Non	Régulièrement	Plus d'1an	MINSANTE	Oui	4	3	3	Oui	Non	Non	Non	A	C	Bon état	Oui	moyenne
43	Ecole publique	Masculin	fonctionnaire	79	Marié	Primaire	Chretien	Non	Secondaire	Masculin	11	1	Oui	Non	Non	Non	Oui	Non	Non	Non	Oui	Non	Non	Non	Non	Oui	Oui	Non	Non	Oui	Non	Non	Non	Saison sèche	Plus d'1an	Achat	Non	2	6	7	Non	Non	Non	Oui	D	C	Bon état	Non	mauvaises
44	Ecole publique	Masculin	Petits business	40	Marié	Secondaire	Chretien	Non	Secondaire	Masculin	4	1	Oui	Non	Non	Non	Oui	Non	Non	Non	Oui	Non	Non	Non	Non	Oui	Oui	Non	Non	Oui	Non	Non	Oui	Régulièrement	plus de 2 ans	MINSANTE	Non	1	4	3	Non	Non	Non	Oui	D	C	Endommagée	Oui	bonne
45	Ecole publique	Masculin	Petits business	47	Marié	Primaire	Paien	Oui	Primaire	Masculin	5	0	Oui	Non	Non	Non	Oui	Non	Non	Non	Oui	Non	Non	Non	Non	Oui	Oui	Non	Non	Oui	Non	Non	Non	Régulièrement	Moins de 6 mois	Achat	Oui	2	2	2	Non	Oui	Non	Non	B	C	Endommagée	Oui	mauvaises
46	Ecole publique	Masculin	Petits business	52	Marié	Secondaire	Chretien	Non	Secondaire	Féminin	10	1	Oui	Non	Non	Non	Oui	Non	Non	Non	Oui	Non	Non	Non	Non	Oui	Oui	Non	Non	Oui	Oui	Non	Non	Régulièrement	plus de 2 ans	MINSANTE	Non	3	4	4	Oui	Non	Non	Non	A	B	Bon état	Oui	mauvaises
47	Ecole publique	Masculin	Petits business	43	Marié	Secondaire	Chretien	Non	Secondaire	Féminin	4	0	Oui	Non	Non	Non	Oui	Non	Non	Non	Oui	Non	Non	Non	Non	Oui	Oui	Non	Non	Oui	Non	Non	Non	Saison sèche	plus de 2 ans	MINSANTE	Oui	5	3	4	Oui	Non	Non	Non	A	C	Bon état	Oui	moyenne
48	Ecole publique	Masculin	Agriculteur		Marié	Primaire	Chretien	Non	Universté	Féminin	7	1	Oui	Non	Non	Non	Oui	Non	Non	Non	Oui	Non	Non	Non	Non	Oui	Oui	Non	Non	Oui	Non	Non	Non	Saison sèche	Moins de 6 mois	Achat	Non	1	4	4	Non	Non	Non	Oui	D	B	Endommagée	Oui	mauvaises
49	Ecole publique	Masculin	Agriculteur	52	Marié	Secondaire	Chretien	Non	Secondaire	Féminin	6	0	Oui	Non	Non	Non	Oui	Non	Non	Non	Oui	Non	Non	Non	Non	Oui	Oui	Non	Non	Oui	Non	Non	Non	Régulièrement	Plus de 6 mois	MINSANTE	Oui	2	2	2	Oui	Non	Non	Non	A	B	Bon état	Oui	moyenne
50	Ecole publique	Masculin	Petits business	30	Marié	Secondaire	Chretien	Oui	Universté	Masculin	3	0	Oui	Non	Non	Non	Oui	Non	Non	Non	Oui	Non	Non	Non	Non	Oui	Non	Oui	Non	Oui	Non	Non	Non	Régulièrement	plus de 2 ans	MINSANTE	Oui	4	3	4	Oui	Non	Non	Non	A	Esthétique	Bon état	Non	moyenne
51	Ecole publique	Masculin	student	21	Célibataire	Secondaire	Chretien	Oui	Secondaire	Masculin	1	0	Oui	Non	Non	Non	Oui	Non	Non	Non	Oui	Non	Non	Non	Non	Oui	Oui	Non	Non	Oui	Non	Non	Non	Régulièrement	Plus d'1an	MINSANTE	Oui	1	1	1	Oui	Non	Non	Non	A	B	Endommagée	Oui	moyenne
52	Ecole publique	Masculin	Petits business	59	Célibataire	Secondaire	Chretien	Non	Secondaire	Masculin	5	0	Oui	Non	Non	Non	Oui	Non	Non	Non	Oui	Non	Non	Non	Non	Oui	Oui	Non	Non	Oui	Non	Non	Non	Régulièrement	plus de 2 ans	MINSANTE	Oui	4	3	4	Oui	Non	Non	Non	A	A	Bon état	Oui	moyenne
53	Ecole publique	Féminin	fonctionnaire	28	Célibataire	Université	Chretien	Oui	Universté	Féminin	2	0	Oui	Non	Non	Oui	Oui	Non	Non	Non	Oui	Oui	Non	Non	Non	Non	Oui	Non	Non	Oui	Non	Oui	Oui	Régulièrement	Plus de 6 mois	Hopital	Oui	1	1	1	Oui	Non	Non	Non	A	A	Bon état	Oui	bonne
305	Ecole publique	Masculin	Agriculteur	53	Marié	Primaire	Chretien	Non	Secondaire	Féminin	5	1	Oui	Non	Non	Non	Oui	Oui	Non	Non	Oui	Non	Non	Non	Non	Oui	Oui	Non	Non	Oui	Non	Non	Non	Quand il y'a les moustiques	plus de 2 ans	MINSANTE	Oui	3	3	3	Oui	Non	Non	Non	A	A	Bon état	Oui	mauvaises
306	Ecole publique	Féminin	Agriculteur	41	Marié	Secondaire	Chretien	Non	Universté	Féminin	5	2	Oui	Non	Oui	Non	Oui	Non	Non	Non	Oui	Non	Non	Non	Non	Oui	Oui	Non	Non	Oui	Non	Non	Non	Régulièrement	Plus de 6 mois	MINSANTE	Oui	5	4	5	Oui	Non	Non	Non	A	C	Bon état	Oui	mauvaises
307	Ecole publique	Masculin	Agriculteur	63	Marié	Primaire	Chretien	Non	Secondaire	Féminin	3	1	Oui	Non	Non	Non	Oui	Non	Non	Non	Oui	Non	Non	Non	Non	Oui	Oui	Oui	Non	Oui	Non	Non	Non	Saison pluvieuse	plus de 2 ans	MINSANTE	Non	2	3	3	Non	Oui	Non	Non	B	C	Endommagée	Oui	moyenne
308	Ecole publique	Masculin	Agriculteur	40	Marié	Secondaire	Chretien	Non	Secondaire	Féminin	5	1	Oui	Non	Oui	Non	Non	Non	Non	Non	Oui	Non	Non	Non	Non	Oui	Oui	Non	Non	Oui	Non	Non	Non	Régulièrement	Plus d'1an	Achat	Non	1	2	3	Non	Non	Oui	Non	C	C	Endommagée	Oui	bonne
309	Ecole publique	Féminin	Petits business	35	Marié	Secondaire	Chretien	Oui	Secondaire	Féminin	5	0	Oui	Non	Non	Non	Oui	Non	Non	Non	Oui	Non	Non	Non	Non	Oui	Non	Oui	Non	Oui	Non	Non	Non	Régulièrement	plus de 2 ans	MINSANTE	Non	1	4	4	Non	Oui	Non	Non	B	C	Endommagée	Oui	moyenne
310	Ecole publique	Masculin	Agriculteur	37	Célibataire	Secondaire	Chretien	Non	Secondaire	Masculin	3	0	Oui	Non	Oui	Non	Non	Non	Non	Non	Oui	Non	Non	Non	Non	Oui	Oui	Non	Non	Oui	Non	Non	Non	Régulièrement	Plus de 6 mois	MINSANTE	Oui	2	2	2	Oui	Non	Non	Non	A	B	Bon état	Oui	mauvaises
311	Ecole publique	Masculin	Agriculteur	62	Marié	Université	Chretien	Non	Secondaire	Masculin	10	2	Oui	Non	Non	Non	Oui	Non	Non	Non	Oui	Non	Non	Non	Non	Oui	Oui	Non	Non	Oui	Non	Non	Non	Régulièrement	Plus de 6 mois	MINSANTE	Oui	4	4	4	Oui	Non	Non	Non	A	C	Bon état	Oui	mauvaises
312	Ecole publique	Féminin	Petits business	34	Célibataire	Primaire	Musulman	Non	Secondaire	Féminin	8	3	Oui	Oui	Non	Non	Non	Non	Non	Non	Oui	Non	Non	Non	Non	Oui	Oui	Non	Non	Oui	Oui	Non	Non	Régulièrement	Plus de 6 mois	MINSANTE	Non	2	2	4	Non	Non	Non	Oui	D	C	Endommagée	Oui	moyenne
313	Ecole publique	Féminin	Petits business	39	Célibataire	Secondaire	Chretien	Oui	Secondaire	Féminin	5	1	Oui	Non	Non	Oui	Non	Non	Non	Non	Oui	Non	Non	Non	Non	Oui	Oui	Non	Non	Oui	Non	Non	Non	Saison sèche	Plus d'1an	Don autre MINSANTE	Oui	3	2	3	Non	Non	Oui	Non	C	C	Endommagée	Oui	moyenne
314	Ecole publique	Féminin	Petits business	31	Célibataire	Secondaire	Chretien	Non	Secondaire	Féminin	4	0	Oui	Non	Oui	Non	Non	Oui	Non	Non	Oui	Non	Non	Non	Non	Oui	Oui	Oui	Non	Oui	Non	Non	Non	Régulièrement	plus de 2 ans	MINSANTE	Non	2	3	3	Non	Non	Oui	Non	C	C	Endommagée	Oui	moyenne
315	Ecole publique	Féminin	Petits business	46	Marié	Primaire	Chretien	Oui	Primaire	Féminin	7	0	Oui	Non	Non	Oui	Oui	Non	Non	Non	Oui	Non	Non	Non	Non	Oui	Oui	Non	Non	Oui	Non	Non	Non	Régulièrement	plus de 2 ans	MINSANTE	Oui	4	3	4	Non	Non	Oui	Non	C	C	Endommagée	Non	mauvaises
316	Ecole publique	Masculin	Agriculteur	40	Célibataire	Secondaire	Chretien	Oui	Secondaire	Masculin	6	1	Oui	Non	Non	Non	Oui	Non	Non	Non	Oui	Non	Non	Non	Non	Oui	Oui	Non	Non	Oui	Oui	Non	Non	Régulièrement	plus de 2 ans	MINSANTE	Oui	3	3	3	Non	Non	Non	Oui	D	C	Endommagée	Oui	moyenne
325	Ecole publique	Féminin	Petits business	33	Marié	Université	Chretien	Oui	Universté	Féminin	7	2	Oui	Oui	Oui	Oui	Oui	Non	Non	Non	Oui	Non	Non	Non	Non	Oui	Oui	Non	Non	Oui	Non	Non	Non	Régulièrement	plus de 2 ans	MINSANTE	Non	2	3	4	Non	Non	Oui	Oui	C,D	C	Endommagée	Oui	moyenne
54	Carrière	Masculin	fonctionnaire	38	Marié	Université	Chretien	Oui	Universté	Masculin	6	4	Oui	Non	Non	Non	Oui	Non	Non	Non	Oui	Non	Non	Non	Non	Oui	Oui	Non	Non	Oui	Non	Non	Non	Saison pluvieuse	Moins de 6 mois	Don autre MINSANTE	Oui	3	2	3	Oui	Non	Non	Non	A	B	Bon état	Oui	bonne
55	Carrière	Masculin	fonctionnaire	64	Marié	Primaire	Chretien	Oui	Primaire	Masculin	7	2	Oui	Non	Non	Non	Oui	Non	Non	Non	Oui	Non	Non	Non	Non	Oui	Oui	Non	Non	Oui	Non	Non	Non	Saison pluvieuse	Plus de 6 mois	MINSANTE	Non	1	5	5	Non	Oui	Non	Non	B	B,C	Endommagée	Oui	moyenne
56	Carrière	Masculin	fonctionnaire	28	Marié	Université	Chretien	Oui	Universté	Masculin	9	1	Oui	Non	Oui	Non	Non	Non	Non	Non	Oui	Non	Non	Non	Non	Oui	Oui	Non	Non	Oui	Non	Non	Non	Régulièrement	plus de 2 ans	MINSANTE	Non	4	5	4	Non	Non	Oui	Non	C	C	Endommagée	Oui	moyenne
57	Carrière	Masculin	Petits business	54	Marié	Secondaire	Chretien	Oui	Secondaire	Masculin	7	0	Oui	Non	Oui	Non	Non	Non	Non	Non	Oui	Non	Non	Non	Oui	Oui	Oui	Non	Non	Oui	Non	Non	Non	Régulièrement	Plus de 6 mois	Achat	Oui	7	4	7	Oui	Non	Non	Non	A	C	Bon état	Non	mauvaises
58	Carrière	Masculin	Petits business	39	Célibataire	Secondaire	Chretien	Oui	Secondaire	Masculin	3	1	Oui	Non	Oui	Non	Non	Non	Non	Non	Oui	Non	Non	Non	Non	Oui	Oui	Non	Non	Oui	Non	Non	Non	Régulièrement	plus de 2 ans	MINSANTE	Oui	2	2	2	Non	Non	Oui	Non	C	A	Bon état	Oui	mauvaises
59	Carrière	Masculin	Agriculteur	55	Marié	Secondaire	Musulman	Oui	Secondaire	Masculin	15	2	Oui	Oui	Oui	Oui	Oui	Non	Non	Non	Oui	Non	Non	Non	Non	Oui	Oui	Non	Non	Oui	Non	Non	Non	Régulièrement	plus de 2 ans	Achat	Non	1	3	5	Non	Oui	Non	Non	B	C	Endommagée	Oui	bonne
60	Carrière	Masculin	Petits business	48	Marié	Secondaire	Chretien	Oui	Secondaire	Masculin	6	1	Oui	Oui	Oui	Non	Oui	Non	Non	Non	Oui	Non	Non	Non	Non	Oui	Oui	Non	Non	Non	Non	Oui	Oui	Saison pluvieuse	Plus d'1an	Achat	Oui	6	4	6	Oui	Non	Non	Non	A	C	Bon état	Oui	mauvaises
61	Carrière	Masculin	Petits business	55	Marié	Primaire	Chretien	Oui	Primaire	Masculin	6	0	Oui	Non	Non	Non	Non	Oui	Non	Non	Oui	Non	Non	Non	Oui	Oui	Oui	Non	Non	Oui	Non	Non	Non	Saison sèche	plus de 2 ans	MINSANTE	Non	3	2	2	Non	Non	Non	Non	Personne	B	Endommagée	Oui	bonne
62	Carrière	Masculin	Petits business	36	Marié	Secondaire	Chretien	Oui	Secondaire	Masculin	4	2	Oui	Oui	Oui	Non	Non	Oui	Non	Non	non	Non	Non	Non	Non	Oui	Oui	Non	Non	Oui	Non	Non	Oui	Régulièrement	plus de 2 ans	Hopital	Non	1	2	2	Non	Non	Non	Non	C	C	Bon état	Non	mauvaises
63	Carrière	Masculin	Petits business		Marié	Secondaire	Chretien	Non	Universté	Masculin	6	1	Oui	Non	Non	Non	Oui	Non	Non	Non	Oui	Non	Non	Non	Non	Oui	Oui	Non	Non	Oui	Non	Non	Non	Régulièrement	Plus d'1an	MINSANTE	Oui	3	3	3	Oui	Non	Non	Non	A	C	Bon état	Oui	mauvaises
64	Carrière	Masculin	Agriculteur	39	Marié	Secondaire	Chretien	Oui	Secondaire	Masculin	4	0	Oui	Non	Oui	Oui	Non	Non	Non	Non	Oui	Non	Non	Non	Non	Oui	Oui	Oui	Non	Oui	Non	Non	Oui	Saison pluvieuse	Plus de 6 mois	Don autre MINSANTE	Non	1	3	4	Non	Oui	Non	Non	B	C	Bon état	Oui	mauvaises
65	Carrière	Féminin	Agriculteur	42	Marié	Primaire	Chretien	Oui	Primaire	Féminin	4	0	Oui	Non	Oui	Non	Non	Oui	Non	Non	Oui	Non	Non	Non	Non	Oui	Oui	Non	Non	Oui	Non	Non	Non	Régulièrement	plus de 2 ans	MINSANTE	Non	2	3	4	Non	Oui	Non	Non	B	C	Endommagée	Oui	mauvaises
66	Carrière	Masculin	student	21	Célibataire	Secondaire	Chretien	Oui	Secondaire	Masculin	1	0	Oui	Non	Non	Non	Oui	Non	Non	Non	Oui	Non	Non	Non	Non	Oui	Oui	Oui	Non	Oui	Non	Non	Non	Régulièrement	plus de 2 ans	MINSANTE	Non	1	1	2	Non	Oui	Non	Non	B	C	Endommagée	Oui	moyenne
67	Carrière	Masculin	fonctionnaire	39	Célibataire	Université	Chretien	Non	Primaire	Féminin	3	0	Oui	Oui	Oui	Oui	Oui	Oui	Non	Non	Oui	Non	Non	Non	Non	Oui	Oui	Non	Non	Oui	Non	Non	Non	Régulièrement	plus de 2 ans	MINSANTE	Non	1	2	2	Non	Non	Non	Non	Personne	C	Endommagée	Oui	moyenne
68	Carrière	Masculin	fonctionnaire	41	Marié	Université	Chretien	Oui	Universté	Masculin	4	2	Oui	Non	Oui	Oui	Non	Non	Non	Non	Oui	Oui	Non	Non	Non	Oui	Oui	Non	Non	Oui	Non	Non	Non	Régulièrement	Moins de 6 mois	MINSANTE	Oui	2	2	2	Non	Oui	Oui	Non	A	A	Bon état	Oui	moyenne
69	Carrière	Masculin	Agriculteur	60	Marié	Sans niveau	Chretien	Non	Secondaire	Féminin	6	2	Oui	Non	Non	Non	Non	Oui	Non	Non	Oui	Non	Non	Non	Non	Oui	Oui	Oui	Non	Oui	Non	Non	Non	Régulièrement	plus de 2 ans	MINSANTE	Non	2	3	3	Non	Oui	Non	Non	B	C	Endommagée	Oui	moyenne
70	Carrière	Féminin	Ménagère	44	Célibataire	Secondaire	Chretien	Oui	Secondaire	Féminin	6	0	Oui	Oui	Non	Oui	Non	Non	Non	Non	Oui	Non	Non	Non	Non	Oui	Oui	Oui	Non	Oui	Non	Non	Non	Régulièrement	Plus de 6 mois	MINSANTE	Non	1	2	2	Non	Non	Non	Oui	D	C	Endommagée	Oui	moyenne
71	Carrière	Féminin	Agriculteur	40	Marié	Primaire	Chretien	Oui	Primaire	Féminin	7	0	Oui	Non	Oui	Non	Non	Non	Non	Non	non	Non	Non	Non	Non	Oui	Oui	Non	Non	Oui	Non	Non	Non	Régulièrement	plus de 2 ans	MINSANTE	Oui	3	2	3	Oui	Non	Non	Non	A	A,C	Endommagée	Non	mauvaises
72	Carrière	Masculin	Petits business	31	Marié	Secondaire	Musulman	Oui	Secondaire	Masculin	3	0	Oui	Non	Non	Non	Non	Oui	Non	Non	Oui	Non	Non	Non	Non	Oui	Oui	Oui	Oui	Oui	Non	Oui	Oui	Régulièrement	plus de 2 ans	Achat	Non	1	3	3	Non	Oui	Non	Non	B	C	Bon état	Oui	moyenne
73	Carrière	Masculin	Agriculteur	69	Marié	Secondaire	Chretien	Oui	Secondaire	Masculin	16	1	Oui	Non	Oui	Non	Non	Non	Non	Non	Oui	Non	Non	Non	Non	Oui	Oui	Non	Non	Oui	Non	Oui	Non	Régulièrement	plus de 2 ans	MINSANTE	Non	9	6	8	Non	Non	Oui	Non	C	A,B	Endommagée	Oui	moyenne
74	Carrière	Masculin	Agriculteur	64	Marié	Primaire	Chretien	Oui	Primaire	Masculin	7	1	Oui	Non	Non	Non	Non	Oui	Non	Non	Oui	Non	Non	Non	Non	Oui	Oui	Non	Non	Oui	Oui	Non	Non	Régulièrement	plus de 2 ans	MINSANTE	Non	1	5	5	Non	Oui	Non	Non	B	C	Endommagée	Oui	bonne
75	Carrière	Masculin	Petits business	43	Marié	Secondaire	Chretien	Oui	Secondaire	Masculin	6	0	Oui	Non	Non	Non	Oui	Non	Non	Non	Oui	Non	Non	Non	Non	Oui	Oui	Oui	Non	Oui	Non	Non	Non	Régulièrement	plus de 2 ans	MINSANTE	Non	2	4	4	Non	Non	Oui	Non	C	C	Endommagée	Oui	moyenne
76	Carrière	Féminin	Ménagère	67	Marié	Secondaire	Chretien	Oui	Secondaire	Féminin	4	0	Oui	Non	Oui	Non	Non	Non	Non	Non	Oui	Non	Non	Non	Non	Oui	Oui	Oui	Non	Oui	Non	Non	Non	Régulièrement	Plus de 6 mois	MINSANTE	Non	2	3	3	Non	Non	Oui	Non	C	A	Endommagée	Oui	mauvaises
77	Carrière	Masculin	Petits business	30	Célibataire	Secondaire	Chretien	Oui	Secondaire	Masculin	3	0	Oui	Non	Non	Non	Non	Oui	Non	Non	Oui	Non	Non	Non	Non	Oui	Oui	Non	Non	Oui	Non	Non	Non	Régulièrement	plus de 2 ans	MINSANTE	Non	1	2	2	Non	Oui	Non	Non	Personne	C	Endommagée	Oui	mauvaises
78	Carrière	Féminin	fonctionnaire	50	Marié	Secondaire	Chretien	Oui	Secondaire	Féminin	6	3	Oui	Non	Oui	Non	Non	Non	Non	Non	Oui	Non	Non	Non	Non	Oui	Oui	Non	Non	Oui	Oui	Non	Non	Régulièrement	plus de 2 ans	MINSANTE	Non	2	5	5	Non	Non	Oui	Non	C	C	Endommagée	Oui	mauvaises
79	Carrière	Masculin	Petits business	41	Célibataire	Secondaire	Chretien	Oui	Secondaire	Masculin	7	2	Oui	Non	Non	Oui	Oui	Non	Non	Non	Oui	Non	Non	Non	Non	Oui	Oui	Oui	Non	Oui	Non	Non	Non	Régulièrement	plus de 2 ans	MINSANTE	Non	2	4	4	Non	Oui	Non	Oui	B,D	C	Endommagée	Oui	mauvaises
80	Carrière	Masculin	Agriculteur	44	Marié	Secondaire	Chretien	Oui	Secondaire	Masculin	6	1	Oui	Non	Oui	Oui	Non	Non	Non	Non	Oui	Non	Non	Non	Non	Oui	Oui	Non	Non	Oui	Non	Non	Oui	Saison sèche	Plus de 6 mois	MINSANTE	Non	4	5	7	Non	Oui	Oui	Non	B,D	C	Endommagée	Oui	moyenne
81	Carrière	Féminin	Ménagère	23	Célibataire	Primaire	Chretien	Oui	Primaire	Féminin	3	2	Oui	Non	Oui	Non	Non	Non	Non	Non	Oui	Non	Non	Non	Non	Oui	Oui	Non	Non	Oui	Non	Non	Non	Régulièrement	plus de 2 ans	Don autre MINSANTE	Non	1	1	2	Non	Non	Non	Non	Personne	C	Endommagée	Oui	mauvaises
82	Carrière	Masculin	Petits business	28	Célibataire	Université	Chretien	Oui	Universté	Masculin	3	0	Oui	Non	Non	Non	Oui	Oui	Non	Non	Oui	Non	Non	Non	Non	Oui	Oui	Oui	Non	Oui	Non	Non	Non	Régulièrement	plus de 2 ans	MINSANTE	Non	1	2	2	Non	Oui	Non	Non	B	C	Endommagée	Oui	mauvaises
83	Carrière	Féminin	Petits business	46	Célibataire	Secondaire	Chretien	Non	Secondaire	Féminin	4	0	Oui	Non	Non	Oui	Oui	Oui	Non	Non	Oui	Non	Non	Non	Non	Oui	Oui	Oui	Non	Oui	Non	Non	Non	Régulièrement	plus de 2 ans	MINSANTE	Oui	3	3	3	Non	Non	Non	Non	Personne	C	Endommagée	Oui	mauvaises
84	Carrière	Féminin	Agriculteur	67	Marié	Primaire	Chretien	Oui	Primaire	Féminin	6	0	Oui	Non	Oui	Non	Non	Non	Non	Non	Oui	Non	Non	Non	Oui	Oui	Oui	Non	Non	Oui	Non	Non	Non	Régulièrement	plus de 2 ans	MINSANTE	Non	3	5	5	Non	Non	Oui	Non	C	B,C	Endommagée	Oui	ras
85	Carrière	Masculin	Agriculteur	45	Marié	Primaire	Chretien	Oui	Primaire	Féminin	4	0	Oui	Non	Non	Non	Non	Oui	Non	Non	Oui	Non	Non	Non	Non	Oui	Oui	Non	Non	Non	Oui	Non	Non	Non	RAS	Non	Non	0	4	4	Non	Non	Non	Non	Personne	C	RAS	Oui	moyenne
86	Carrière	Masculin	Agriculteur	69	Marié	Primaire	Chretien	Oui	Primaire	Masculin	7	1	Oui	Non	Non	Non	Non	Oui	Oui	Non	non	Non	Non	Oui	Oui	Oui	Oui	Non	Non	Oui	Non	Non	Non	Régulièrement	plus de 2 ans	Don autre MINSANTE	Non	1	6	7	Non	Non	Non	Oui	D	C	Endommagée	Oui	mauvaises
87	Carrière	Masculin	Agriculteur	45	Marié	Secondaire	Chretien	Non	Universté	Féminin	3	1	Oui	Non	Non	Non	Oui	Non	Non	Non	Oui	Non	Non	Non	Non	Oui	Oui	Non	Non	Oui	Non	Non	Non	Régulièrement	plus de 2 ans	MINSANTE	Non	1	2	2	Non	Oui	Non	Non	B	C	Endommagée	Oui	mauvaises
88	Carrière	Masculin	Agriculteur	65	Marié	Primaire	Chretien	Non	Secondaire	Masculin	14	0	Oui	Non	Non	Non	Oui	Non	Non	Non	Oui	Non	Non	Non	Non	Oui	Oui	Non	Non	Oui	Non	Non	Non	Régulièrement	plus de 2 ans	MINSANTE	Non	1	5	5	Non	Non	Non	Non	Personne	C	Endommagée	Oui	mauvaises
89	Carrière	Masculin	Agriculteur	67	Marié	Primaire	Chretien	Oui	Primaire	Masculin	8	0	Oui	Non	Non	Non	Non	Oui	Non	Non	Oui	Non	Non	Non	Oui	Oui	Oui	Oui	Non	Oui	Non	Oui	Non	Saison pluvieuse	plus de 2 ans	MINSANTE	Non	4	4	5	Non	Non	Oui	Non	C	A,B	Endommagée	Oui	moyenne
90	Carrière	Féminin	Petits business	43	Marié	Secondaire	Chretien	Oui	Secondaire	Féminin	10	1	Oui	Non	Oui	Oui	Non	Oui	Non	Non	Oui	Non	Non	Non	Non	Oui	Oui	Oui	Non	Oui	Oui	Non	Non	Saison pluvieuse	plus de 2 ans	MINSANTE	Non	1	5	5	Non	Oui	Non	Non	B	C	Endommagée	Oui	moyenne
91	Carrière	Masculin	Agriculteur	32	Marié	Secondaire	Chretien	Non	Secondaire	Féminin	5	1	Oui	Non	Non	Non	Non	Oui	Non	Non	Oui	Non	Non	Non	Non	Oui	Oui	Oui	Non	Oui	Non	Non	Non	Régulièrement	plus de 2 ans	Achat	Non	1	2	2	Non	Non	Non	Non	Personne	C	Endommagée	Oui	mauvaises
210	Carrière	Féminin	Ménagère	69	Veuve	Sans niveau	Chretien	Non	Universté	Féminin	9	3	Oui	Oui	Oui	Oui	Oui	Oui	Non	Non	Oui	Non	Non	Non	Non	Oui	Oui	Non	Non	Oui	Non	Non	Non	Régulièrement	plus de 2 ans	MINSANTE	Non	4	5	6	Non	Oui	Non	Oui	B	C	Endommagée	Oui	mauvaises
211	Carrière	Masculin	Petits business	39	Marié	Secondaire	Musulman	Non	Secondaire	Féminin	4	0	Oui	Non	Oui	Non	Oui	Non	Non	Non	Oui	Non	Non	Non	Non	Oui	Oui	Non	Non	Oui	Non	Non	Non	Saison sèche	plus de 2 ans	MINSANTE	Oui	4	4	4	Oui	Non	Non	Non	A	A,C	Endommagée	Oui	mauvaises
212	Carrière	Masculin	Agriculteur	35	Célibataire	Secondaire	Chretien	Oui	Secondaire	Masculin	2	0	Oui	Non	Oui	Non	Oui	Non	Non	Non	Oui	Non	Non	Non	Non	Oui	Oui	Oui	Non	Oui	Non	Non	Non	Régulièrement	plus de 2 ans	MINSANTE	Oui	1	1	1	Non	Non	Non	Non	Personne	Déchirées	Endommagée	Oui	mauvaises
213	Carrière	Masculin	Agriculteur	59	Veuve	Primaire	Chretien	Non	Secondaire	Féminin	3	0	Oui	Non	Non	Non	Non	Non	Non	Oui	Oui	Non	Non	Non	Non	Oui	Oui	Non	Non	Oui	Non	Non	Non	Régulièrement	plus de 2 ans	MINSANTE	Oui	3	3	3	Oui	Non	Non	Non	A	C	Endommagée	Oui	mauvaises
214	Carrière	Féminin	Agriculteur	36	Célibataire	Secondaire	Chretien	Oui	Secondaire	Féminin	4	1	Oui	Non	Oui	Non	Non	Oui	Non	Non	Oui	Non	Non	Non	Non	Oui	Oui	Non	Non	Oui	Non	Non	Non	Régulièrement	Plus de 6 mois	Achat	Oui	3	3	3	Oui	Non	Non	Non	A	A	Bon état	Oui	mauvaises
215	Carrière	Féminin	fonctionnaire		Marié	Secondaire	Musulman	Non	Universté	Masculin	3	0	Oui	Oui	Oui	Oui	Oui	Oui	Non	Non	Oui	Non	Non	Non	Non	Oui	Oui	Non	Non	Oui	Non	Non	Non	Régulièrement	Moins de 6 mois	Don autre MINSANTE	Non	2	3	3	Non	Non	Non	Oui	Personne	C	Bon état	Oui	mauvaises
216	Carrière	Masculin	Agriculteur	61	Marié	Primaire	Chretien	Non	Secondaire	Masculin	6	2	Oui	Non	Non	Non	Oui	Non	Non	Non	Oui	Oui	Non	Non	Non	Oui	Oui	Non	Non	Oui	Non	Non	Non	Régulièrement	plus de 2 ans	MINSANTE	Non	3	4	4	Non	Oui	Non	Non	B	Insuffisant	Endommagée	Oui	mauvaises
217	Carrière	Masculin	Petits business	56	Marié	Secondaire	Chretien	Non	Secondaire	Féminin	4	1	Oui	Oui	Oui	Oui	Oui	Non	Non	Non	Oui	Non	Non	Non	Non	Oui	Oui	Oui	Non	Oui	Non	Non	Non	Régulièrement	plus de 2 ans	MINSANTE	Non	1	3	3	Non	Oui	Non	Oui	B,D	C	Endommagée	Oui	mauvaises
218	Carrière	Masculin	Agriculteur	65	Marié	Primaire	Chretien	Oui	Primaire	Masculin	6	0	Oui	Non	Oui	Non	Non	Non	Non	Non	Oui	Non	Non	Non	Non	Oui	Oui	Non	Non	Oui	Non	Non	Non	Rarement	Plus d'1an	MINSANTE	Oui	6	5	6	Oui	Non	Non	Non	A	A	Bon état	Oui	moyenne
219	Carrière	Féminin	fonctionnaire	31	Marié	Secondaire	Chretien	Oui	Secondaire	Féminin	3	1	Oui	Oui	Oui	Oui	Oui	Oui	Non	Non	Oui	Non	Non	Non	Non	Oui	Oui	Oui	Non	Oui	Non	Non	Oui	Régulièrement	plus de 2 ans	MINSANTE	Oui	2	2	2	Oui	Non	Non	Non	A	C	Endommagée	Oui	bonne
220	Carrière	Masculin	Agriculteur	52	Célibataire	Secondaire	Chretien	Oui	Secondaire	Masculin	5	0	Oui	Non	Non	Non	Oui	Non	Non	Non	Oui	Non	Non	Non	Non	Oui	Oui	Non	Non	Oui	Non	Oui	Oui	Saison pluvieuse	plus de 2 ans	MINSANTE	Non	2	4	5	Non	Non	Oui	Non	C	C	Endommagée	Oui	moyenne
221	Carrière	Masculin	Petits business	39	Célibataire	Primaire	Chretien	Non	Secondaire	Féminin	2	0	Oui	Non	Non	Non	Non	Non	Oui	Non	non	Non	Oui	Non	Oui	Oui	Oui	Non	Non	Oui	Non	Non	Non	Saison pluvieuse	plus de 2 ans	Achat	Oui	2	2	2	Oui	Non	Non	Non	A	C	Bon état	Oui	mauvaises
110	Mock-Centre	Masculin	Agriculteur	58	Célibataire	Secondaire	Chretien	Non	Secondaire	Féminin	9	3	Oui	Non	Non	Non	Oui	Non	Non	Non	Oui	Non	Non	Non	Non	Oui	Non	Oui	Non	Oui	Non	Oui	Non	Régulièrement	plus de 2 ans	MINSANTE	Non	2	4	4	Oui	Non	Oui	Non	A	C	Endommagée	Non	mauvaises
111	Mock-Centre	Masculin	Agriculteur	64	Marié	Secondaire	Chretien	Non	Secondaire	Féminin	3	0	Oui	Non	Non	Non	Oui	Non	Non	Non	Oui	Oui	Non	Non	Non	Oui	Oui	Non	Non	Oui	Non	Non	Non	Régulièrement	plus de 2 ans	MINSANTE	Oui	3	3	3	Oui	Non	Non	Non	A	C	Endommagée	Non	moyenne
112	Mock-Centre	Masculin	Agriculteur	48	Marié	Primaire	Chretien	Non	Secondaire	Masculin	8	1	Oui	Non	Non	Non	Oui	Non	Non	Non	Oui	Non	Non	Non	Non	Oui	Oui	Non	Non	Oui	Non	Non	Non	Saison pluvieuse	plus de 2 ans	MINSANTE	Oui	4	4	6	Oui	Non	Non	Non	A	B	Bon état	Oui	mauvaises
113	Mock-Centre	Féminin	Petits business	41	Célibataire	Université	Chretien	Oui	Universté	Féminin	4	1	Oui	Non	Oui	Oui	Non	Non	Non	Non	Oui	Non	Non	Non	Non	Oui	Oui	Non	Oui	Oui	Non	Non	Oui	Régulièrement	Moins de 6 mois	Achat	Oui	2	2	2	Oui	Non	Non	Non	A	A	Bon état	Oui	moyenne
114	Mock-Centre	Masculin	student	25	Célibataire	Secondaire	Chretien	Oui	Secondaire	Masculin	1	0	Oui	Non	Oui	Non	Non	Non	Non	Non	Oui	Non	Non	Non	Non	Oui	Oui	Non	Non	Oui	Non	Non	Non	Régulièrement	Moins de 6 mois	MINSANTE	Oui	1	2	1	Non	Non	Non	Non	A	C	Bon état	Oui	moyenne
115	Mock-Centre	Féminin	Ménagère	42	Marié	Primaire	Chretien	Non	Universté	Féminin	7	0	Oui	Non	Non	Non	Oui	Non	Non	Non	Oui	Non	Non	Non	Non	Oui	Oui	Oui	Non	Oui	Non	Oui	Oui	Régulièrement	plus de 2 ans	MINSANTE	Non	1	4	4	Non	Non	Non	Oui	D	C	Endommagée	Oui	moyenne
116	Mock-Centre	Féminin	Agriculteur	44	Marié	Secondaire	Chretien	Oui	Secondaire	Féminin	6	1	Oui	Non	Oui	Non	Non	Non	Non	Non	Oui	Non	Non	Non	Non	Oui	Oui	Non	Non	Oui	Non	Non	Non	Régulièrement	plus de 2 ans	MINSANTE	Non	2	4	4	Non	Oui	Non	Oui	B,D	C	Endommagée	Oui	mauvaises
117	Mock-Centre	Masculin	fonctionnaire	27	Célibataire	Secondaire	Chretien	Oui	Secondaire	Masculin	1	0	Oui	Oui	Oui	Oui	Oui	Non	Non	Non	Oui	Non	Non	Non	Non	Oui	Oui	Non	Non	Oui	Non	Oui	Non	Saison pluvieuse	Plus d'1an	MINSANTE	Oui	1	1	1	Oui	Non	Non	Non	A	A	Bon état	Oui	bonne
118	Mock-Centre	Féminin	Petits business	58	Célibataire	Primaire	Chretien	Non	Secondaire	Masculin	5	1	Oui	Non	Non	Non	Oui	Non	Non	Non	Oui	Oui	Non	Non	Non	Oui	Oui	Non	Non	Oui	Non	Non	Non	Régulièrement	plus de 2 ans	MINSANTE	Non	3	4	5	Non	Oui	Non	Oui	B,D	C	Endommagée	Oui	bonne
119	Mock-Centre	Masculin	Petits business	43	Célibataire	Secondaire	Chretien	Oui	Secondaire	Masculin	6	1	Oui	Non	Non	Non	Oui	Non	Non	Non	Oui	Oui	Non	Non	Non	Oui	Non	Oui	Non	Oui	Non	Non	Non	Régulièrement	plus de 2 ans	Achat	Non	3	5	5	Non	Non	Non	Oui	D	C	Endommagée	Oui	bonne
120	Mock-Centre	Masculin	Agriculteur	51	Marié	Secondaire	Chretien	Non	Secondaire	Masculin	5	0	Oui	Oui	Oui	Oui	Oui	Oui	Non	Non	Oui	Oui	Non	Non	Non	Oui	Oui	Non	Non	Oui	Non	Non	Non	Rarement	Plus d'1an	MINSANTE	Non	1	3	3	Non	Non	Oui	Non	C	Sans raison	Endommagée	Oui	mauvaises
121	Mock-Centre	Féminin	fonctionnaire	37	Célibataire	Université	Chretien	Oui	Universté	Féminin	1	0	Oui	Non	Oui	Non	Oui	Non	Non	Non	Oui	Non	Non	Non	Non	Oui	Oui	Non	Non	Oui	Non	Non	Non	Régulièrement	Plus de 6 mois	MINSANTE	Oui	1	1	1	Oui	Non	Non	Non	A	C	Bon état	Oui	moyenne
122	Mock-Centre	Masculin	Petits business	30	Célibataire	Sans niveau	Musulman	Oui	Sans niveau	Masculin	2	0	Oui	Non	Non	Non	Non	Non	Oui	Non	non	Non	Non	Oui	Oui	Oui	Oui	Non	Non	Oui	Oui	Non	Non	Régulièrement	Plus d'1an	MINSANTE	Oui	1	1	1	Oui	Non	Non	Non	A	A	Endommagée	Non	mauvaises
123	Mock-Centre	Féminin	fonctionnaire	46	Célibataire	Université	Chretien	Non	Secondaire	Masculin	5	0	Oui	Non	Non	Non	Oui	Non	Non	Non	Oui	Non	Non	Non	Non	Oui	Oui	Non	Non	Oui	Non	Non	Oui	Régulièrement	plus de 2 ans	MINSANTE	Non	2	3	3	Oui	Non	Non	Non	A	C	Endommagée	Oui	moyenne
124	Mock-Centre	Féminin	Ménagère	66	Marié	Primaire	Chretien	Oui	Primaire	Féminin	3	0	Oui	Non	Non	Non	Non	Oui	Non	Non	Oui	Non	Non	Non	Non	Oui	Oui	Non	Non	Non	Non	Non	Oui	Non	RAS	Non	Non	0	3	3	Non	Non	Non	Non	Personne	C	RAS	Oui	bonne
125	Mock-Centre	Masculin	Petits business	57	Marié	Université	Chretien	Oui	Universté	Masculin	3	1	Oui	Non	Oui	Non	Oui	Non	Non	Non	Oui	Non	Non	Non	Non	Oui	Oui	Non	Non	Oui	Non	Non	Oui	Régulièrement	Plus d'1an	Don autre MINSANTE	Oui	2	2	2	Oui	Non	Non	Non	A	C	Endommagée	Oui	mauvaises
126	Mock-Centre	Masculin	Petits business	53	Marié	Université	Paien	Oui	Universté	Masculin	4	1	Oui	Oui	Oui	Non	Oui	Non	Non	Non	Oui	Non	Non	Non	Non	Oui	Oui	Oui	Non	Oui	Non	Non	Oui	Saison pluvieuse	Plus d'1an	Achat	Non	2	3	3	Non	Oui	Non	Oui	B;D	B	Endommagée	Oui	bonne
336	Mock-Centre	Masculin	Petits business	55	Marié	Secondaire	Chretien	Non	Secondaire	Féminin	7	2	Oui	Non	Non	Non	Oui	Non	Non	Non	Oui	Non	Non	Non	Non	Oui	Non	Oui	Non	Oui	Non	Non	Non	Régulièrement	Moins de 6 mois	MINSANTE	Oui	7	5	6	Oui	Non	Non	Non	A	C	Bon état	Oui	mauvaises
337	Mock-Centre	Masculin	Petits business	34	Marié	Secondaire	Chretien	Non	Secondaire	Masculin	8	4	Oui	Non	Non	Non	Oui	Non	Non	Non	Oui	Non	Non	Non	Non	Oui	Oui	Non	Non	Oui	Non	Non	Non	Régulièrement	plus de 2 ans	MINSANTE	Oui	4	4	4	Oui	Non	Non	Non	A	C	Bon état	Oui	mauvaises
338	Mock-Centre	Masculin	Agriculteur	49	Marié	Primaire	Chretien	Oui	Primaire	Masculin	6	1	Oui	Oui	Oui	Non	Oui	Oui	Non	Non	Oui	Non	Non	Non	Non	Oui	Oui	Oui	Non	Oui	Non	Non	Non	Régulièrement	plus de 2 ans	MINSANTE	Non	3	4	4	Oui	Non	Non	Non	A	Insuffisant	Endommagée	Oui	moyenne
339	Mock-Centre	Masculin	Petits business	40	Marié	Secondaire	Chretien	Oui	Secondaire	Masculin	4	0	Oui	Oui	Oui	Oui	Oui	Oui	Non	Non	Oui	Non	Non	Non	Non	Oui	Oui	Non	Non	Non	Oui	Non	Non	Non	RAS	Non	Non	0	3	3	Non	Non	Non	Non	Personne	C	RAS	Oui	moyenne
340	Mock-Centre	Masculin	Agriculteur	41	Célibataire	Primaire	Chretien	Oui	Primaire	Masculin	5	1	Oui	Non	Non	Non	Non	Non	Oui	Non	non	Non	Oui	Non	Non	Oui	Oui	Non	Non	Oui	Non	Non	Non	Régulièrement	Plus d'1an	Achat	Non	2	4	4	Non	Oui	Non	Non	Personne	C	Bon état	Oui	bonne
341	Mock-Centre	Masculin	Petits business	32	Célibataire	Secondaire	Chretien	Oui	Secondaire	Masculin	1	0	Oui	Oui	Oui	Oui	Oui	Oui	Oui	Non	Oui	Non	Non	Non	Non	Oui	Oui	Non	Non	Oui	Non	Non	Non	Régulièrement	plus de 2 ans	MINSANTE	Oui	1	1	1	Oui	Non	Non	Non	A	C	Bon état	Oui	bonne
342	Mock-Centre	Masculin	Petits business	30	Marié	Secondaire	Chretien	Non	Secondaire	Féminin	3	1	Oui	Oui	Oui	Oui	Oui	Non	Non	Non	Oui	Non	Non	Non	Non	Oui	Oui	Oui	Non	Oui	Non	Non	Non	Régulièrement	plus de 2 ans	MINSANTE	Non	1	2	2	Non	Non	Oui	Non	C	C	Endommagée	Oui	mauvaises
343	Mock-Centre	Masculin	Petits business	36	Marié	Secondaire	Chretien	Non	Universté	Féminin	4	0	Oui	Oui	Oui	Oui	Oui	Non	Non	Non	Oui	Non	Non	Non	Non	Oui	Oui	Oui	Non	Oui	Non	Non	Non	Régulièrement	plus de 2 ans	MINSANTE	Non	2	3	4	Non	Non	Oui	Non	C	C	Endommagée	Oui	mauvaises
344	Mock-Centre	Masculin	fonctionnaire	41	Marié	Secondaire	Chretien	Non	Secondaire	Féminin	5	0	Oui	Oui	Oui	Oui	Oui	Non	Non	Non	Oui	Non	Non	Non	Non	Oui	Oui	Non	Non	Oui	Non	Non	Non	Régulièrement	plus de 2 ans	MINSANTE	Non	2	3	3	Non	Non	Oui	Non	C	C	Endommagée	Oui	moyenne
345	Mock-Centre	Masculin	Petits business	32	Célibataire	Secondaire	Chretien	Non	Secondaire	Masculin	3	1	Oui	Non	Oui	Non	Non	Oui	Non	Non	Oui	Non	Non	Non	Oui	Oui	Oui	Oui	Non	Oui	Non	Non	Non	Régulièrement	plus de 2 ans	MINSANTE	Oui	2	2	2	Oui	Non	Non	Non	A	C	Endommagée	Oui	mauvaises
92	Barriere	Masculin	Petits business	30	Marié	Secondaire	Chretien	Oui	Secondaire	Masculin	3	0	Oui	Non	Non	Non	Oui	Non	Non	Non	Oui	Non	Non	Non	Non	Non	Oui	Non	Non	Oui	Non	Non	Non	Régulièrement	Plus d'1an	Achat	Oui	2	2	2	Oui	Non	Non	Non	A	A	Bon état	Oui	mauvaises
93	Barriere	Féminin	Petits business	41	Marié	Secondaire	Chretien	Non	Secondaire	Masculin	3	1	Oui	Non	Oui	Non	Oui	Non	Non	Non	Oui	Non	Non	Non	Non	Oui	Non	Oui	Non	Oui	Non	Non	Oui	Régulièrement	Moins de 6 mois	Achat	Oui	2	2	2	Oui	Non	Non	Non	A	A	Bon état	Oui	mauvaises
94	Barriere	Féminin	fonctionnaire	28	Célibataire	Université	Chretien	Non	Secondaire	Masculin	4	0	Oui	Non	Non	Non	Oui	Non	Non	Non	Oui	Non	Oui	Non	Non	Oui	Oui	Non	Non	Oui	Non	Oui	Non	Régulièrement	Plus d'1an	MINSANTE	Non	1	2	3	Non	Non	Non	Oui	D	C	Endommagée	Oui	mauvaises
95	Barriere	Féminin	Agriculteur	59	Marié	Université	Chretien	Non	Secondaire	Féminin	10	0	Oui	Non	Non	Non	Oui	Non	Non	Non	Oui	Non	Non	Non	Non	Oui	Oui	Non	Non	Oui	Non	Non	Non	Saison pluvieuse	Plus d'1an	Don autre MINSANTE	Oui	5	5	5	Oui	Non	Non	Non	A	C	Bon état	Oui	mauvaises
96	Barriere	Féminin	Agriculteur	53	Marié	Secondaire	Chretien	Non	Secondaire	Masculin	8	0	Oui	Non	Non	Non	Oui	Non	Non	Non	non	Non	Non	Non	Oui	Oui	Oui	Non	Non	Oui	Non	Non	Non	Régulièrement	Plus d'1an	MINSANTE	Oui	2	2	2	Non	Oui	Non	Non	B	B	Endommagée	Non	mauvaises
97	Barriere	Masculin	fonctionnaire	33	Célibataire	Université	Chretien	Oui	Universté	Masculin	1	0	Oui	Oui	Oui	Oui	Oui	Non	Non	Non	Oui	Oui	Non	Non	Non	Oui	Oui	Non	Non	Oui	Non	Non	Non	Régulièrement	Plus d'1an	MINSANTE	Oui	1	1	1	Oui	Non	Non	Non	A	B	Bon état	Oui	bonne
98	Barriere	Masculin	Petits business	30	Célibataire	Université	Chretien	Oui	Universté	Masculin	4	0	Oui	Oui	Oui	Oui	Oui	Non	Non	Non	Oui	Oui	Non	Non	Non	Oui	Oui	Oui	Oui	Oui	Non	Non	Non	Régulièrement	Moins de 6 mois	MINSANTE	Non	3	4	4	Oui	Non	Non	Non	A	C	Bon état	Non	bonne
99	Barriere	Masculin	Petits business	29	Marié	Secondaire	Chretien	Oui	Secondaire	Masculin	5	1	Oui	Non	Oui	Oui	Non	Non	Non	Non	Oui	Non	Non	Non	Non	Oui	Oui	Non	Non	Oui	Non	Non	Oui	Régulièrement	Moins de 6 mois	MINSANTE	Non	3	5	5	Non	Non	Oui	Non	C	A	Bon état	Oui	moyenne
100	Barriere	Masculin	fonctionnaire	41	Célibataire	Université	Chretien	Oui	Universté	Masculin	5	0	Oui	Non	Non	Non	Non	Oui	Non	Non	Oui	Non	Non	Non	Non	Oui	Oui	Non	Non	Oui	Non	Non	Non	Régulièrement	Plus d'1an	Achat	Non	2	3	3	Non	Non	Oui	Non	C	C	Endommagée	Oui	moyenne
101	Barriere	Masculin	fonctionnaire	47	Marié	Université	Paien	Non	Secondaire	Masculin	6	1	Oui	Non	Non	Non	Oui	Non	Non	Non	Oui	Non	Non	Non	Non	Oui	Non	Oui	Oui	Oui	Non	Oui	Non	Saison pluvieuse	Moins de 6 mois	MINSANTE	Oui	4	4	4	Oui	Non	Non	Non	A	B	Bon état	Oui	mauvaises
102	Barriere	Masculin	Petits business	28	Célibataire	Secondaire	Chretien	Oui	Secondaire	Masculin	6	3	Oui	Non	Non	Non	Oui	Non	Non	Non	Oui	Non	Non	Non	Non	Oui	Oui	Non	Non	Oui	Non	Non	Non	Régulièrement	Plus d'1an	Don autre MINSANTE	Non	3	5	4	Non	Oui	Non	Non	B	Déchirées	Endommagée	Oui	moyenne
103	Barriere	Masculin	fonctionnaire	40	Marié	Université	Musulman	Oui	Universté	Masculin	5	2	Oui	Non	Non	Non	Oui	Non	Non	Non	Oui	Non	Non	Non	Non	Oui	Oui	Non	Non	Oui	Non	Non	Non	Saison pluvieuse	Plus d'1an	MINSANTE	Non	1	3	2	Non	Oui	Non	Non	B	C	Bon état	Oui	moyenne
104	Barriere	Féminin	fonctionnaire	47	Marié	Université	Chretien	Non	Universté	Féminin	4	0	Oui	Oui	Oui	Oui	Oui	Non	Non	Non	Oui	Non	Non	Non	Non	Non	Oui	Non	Non	Oui	Non	Non	Non	Régulièrement	Plus d'1an	Achat	Oui	2	2	2	Oui	Non	Non	Non	A	A	Bon état	Oui	moyenne
105	Barriere	Masculin	Agriculteur	38	Célibataire	Secondaire	Chretien	Non	Secondaire	Féminin	5	1	Oui	Non	Non	Non	Oui	Non	Non	Non	Oui	Non	Non	Non	Non	Oui	Oui	Non	Non	Oui	Non	Non	Non	Saison sèche	Plus de 6 mois	MINSANTE	Oui	3	3	3	Non	Oui	Non	Oui	B,D	B	Endommagée	Oui	moyenne
106	Barriere	Féminin	Petits business	42	Marié	Primaire	Chretien	Oui	Primaire	Féminin	5	1	Oui	Non	Non	Non	Oui	Non	Non	Non	Oui	Non	Non	Non	Non	Oui	Oui	Non	Non	Oui	Non	Non	Non	Régulièrement	plus de 2 ans	MINSANTE	Non	2	3	5	Non	Oui	Oui	Non	D	C	Endommagée	Oui	mauvaises
107	Barriere	Masculin	Agriculteur	67	Marié	Primaire	Chretien	Oui	Primaire	Masculin	3	0	Oui	Oui	Oui	Non	Oui	Non	Non	Non	Oui	Non	Non	Non	Non	Oui	Oui	Non	Non	Oui	Non	Non	Non	Régulièrement	plus de 2 ans	MINSANTE	Oui	3	3	3	Oui	Non	Non	Non	A	A	Endommagée	Oui	moyenne
108	Barriere	Masculin	Petits business	44	Célibataire	Primaire	Chretien	Oui	Primaire	Masculin	1	0	Oui	Non	Non	Non	Oui	Non	Non	Non	Oui	Non	Non	Non	Oui	Oui	Oui	Non	Non	Oui	Non	Non	Non	Régulièrement	plus de 2 ans	Achat	Oui	1	1	1	Oui	Non	Non	Non	A	C	Bon état	Oui	mauvaises
109	Barriere	Masculin	Petits business	47	Marié	Primaire	Musulman	Oui	Primaire	Masculin	6	1	Oui	Non	Non	Non	Oui	Non	Non	Non	Oui	Non	Non	Non	Non	Oui	Oui	Non	Non	Oui	Non	Oui	Oui	Régulièrement	plus de 2 ans	MINSANTE	Oui	4	3	4	Oui	Non	Non	Non	A	C	Endommagée	Non	mauvaises
153	Barriere	Masculin	Petits business	29	Marié	Primaire	Musulman	Non	Primaire	Masculin	4	0	Oui	Non	Non	Non	Non	Non	Oui	Non	Oui	Non	Non	Non	Non	Oui	Oui	Non	Non	Oui	Non	Non	Non	Rarement	plus de 2 ans	MINSANTE	Non	2	3	4	Non	Non	Oui	Oui	Personne	A	Bon état	Oui	bonne
154	Barriere	Masculin	Petits business	41	Marié	Secondaire	Chretien	Oui	Secondaire	Masculin	4	0	Oui	Non	Oui	Oui	Oui	Non	Non	Non	Oui	Non	Non	Non	Non	Oui	Oui	Oui	Non	Oui	Non	Non	Non	Régulièrement	plus de 2 ans	MINSANTE	Non	2	3	3	Non	Oui	Non	Non	B	Etouffe	Bon état	Oui	moyenne
155	Barriere	Masculin	fonctionnaire	39	Marié	Secondaire	Chretien	Non	Secondaire	Masculin	7	2	Oui	Non	Non	Non	Non	Oui	Non	Non	Oui	Non	Non	Non	Non	Oui	Oui	Non	Non	Oui	Non	Non	Non	Régulièrement	plus de 2 ans	MINSANTE	Non	3	5	5	Non	Oui	Non	Oui	B,D	C	Endommagée	Oui	moyenne
156	Barriere	Masculin	Petits business	32	Célibataire	Secondaire	Chretien	Oui	Secondaire	Masculin	3	0	Oui	Non	Non	Non	Oui	Non	Non	Non	Oui	Non	Non	Non	Non	Oui	Oui	Non	Non	Oui	Non	Non	Non	Régulièrement	plus de 2 ans	MINSANTE	Non	1	2	2	Non	Oui	Non	Non	B	C	Bon état	Oui	moyenne
157	Barriere	Masculin	Petits business	30	Célibataire	Secondaire	Chretien	Non	Secondaire	Féminin	2	0	Oui	Non	Oui	Non	Non	Non	Non	Non	Oui	Non	Non	Non	Non	Oui	Oui	Non	Non	Oui	Non	Non	Non	Régulièrement	plus de 2 ans	MINSANTE	Non	1	2	2	Non	Oui	Non	Non	B	C	Endommagée	Oui	mauvaises
158	Barriere	Masculin	Petits business	64	Marié	Secondaire	Chretien	Non	Secondaire	Féminin	9	0	Oui	Non	Oui	Non	Non	Non	Non	Non	Oui	Non	Non	Non	Non	Non	Oui	Non	Non	Oui	Non	Non	Non	Saison pluvieuse	plus de 2 ans	MINSANTE	Non	2	6	6	Non	Oui	Non	Non	B	C	Endommagée	Oui	moyenne
159	Barriere	Masculin	Petits business	28	Célibataire	Secondaire	Paien	Oui	Secondaire	Masculin	1	0	Oui	Non	Oui	Non	Oui	Non	Non	Non	Oui	Non	Non	Non	Non	Oui	Oui	Non	Non	Oui	Non	Non	Non	Régulièrement	plus de 2 ans	MINSANTE	Oui	1	1	1	Oui	Non	Non	Non	A	Déchirées	Endommagée	Oui	bonne
160	Barriere	Masculin	Petits business	41	Marié	Secondaire	Chretien	Oui	Secondaire	Masculin	10	4	Oui	Non	Non	Non	Oui	Non	Non	Non	Oui	Non	Non	Non	Non	Oui	Oui	Oui	Non	Oui	Non	Non	Non	Régulièrement	plus de 2 ans	MINSANTE	Non	5	5	7	Non	Oui	Non	Oui	B,D	Insuffisant	Endommagée	Oui	mauvaises
161	Barriere	Masculin	Petits business	36	Célibataire	Secondaire	Chretien	Oui	Secondaire	Masculin	1	0	Oui	Non	Oui	Non	Oui	Non	Non	Non	Oui	Non	Non	Non	Non	Oui	Oui	Non	Non	Oui	Non	Non	Non	Régulièrement	Plus d'1an	MINSANTE	Non	0	1	1	Non	Non	Non	Non	Personne	C	RAS	Oui	moyenne
162	Barriere	Masculin	Petits business	46	Marié	Primaire	Chretien	Oui	Secondaire	Masculin	6	0	Oui	Non	Non	Non	Non	Oui	Non	Non	Oui	Non	Non	Non	Non	Oui	Oui	Oui	Non	Oui	Non	Non	Non	Régulièrement	plus de 2 ans	MINSANTE	Non	0	6	3	Oui	Non	Non	Non	A	C	Endommagée	Oui	mauvaises
163	Town water	Masculin	Agriculteur	41	Célibataire	Secondaire	Chretien	Oui	Secondaire	Masculin	1	0	Oui	Non	Oui	Non	Oui	Non	Non	Non	Oui	Oui	Non	Non	Non	Oui	Non	Oui	Non	Oui	Non	Non	Non	Régulièrement	Plus d'1an	MINSANTE	Oui	1	2	1	Oui	Non	Non	Non	A	B,C	Endommagée	Oui	mauvaises
164	Town water	Masculin	Agriculteur	39	Marié	Secondaire	Chretien	Non	Secondaire	Féminin	7	1	Oui	Non	Non	Non	Oui	Non	Non	Non	Oui	Non	Non	Non	Non	Oui	Non	Oui	Non	Oui	Non	Non	Non	Régulièrement	plus de 2 ans	MINSANTE	Oui	4	2	3	Oui	Non	Non	Non	A	C	Bon état	Oui	mauvaises
165	Town water	Masculin	Agriculteur	48	Marié	Secondaire	Chretien	Non	Secondaire	Féminin	5	2	Oui	Non	Non	Non	Oui	Non	Non	Non	Oui	Non	Non	Non	Non	Oui	Oui	Non	Non	Oui	Non	Non	Non	Régulièrement	plus de 2 ans	MINSANTE	Oui	2	2	2	Oui	Non	Non	Non	A	A	Endommagée	Oui	mauvaises
166	Town water	Féminin	Agriculteur	38	Marié	Secondaire	Chretien	Oui	Secondaire	Féminin	8	5	Oui	Non	Oui	Non	Oui	Non	Non	Non	Oui	Non	Non	Non	Non	Oui	Oui	Oui	Non	Oui	Non	Non	Non	Régulièrement	plus de 2 ans	MINSANTE	Oui	3	2	3	Non	Oui	Oui	Non	B,C	Déchirées	Endommagée	Oui	mauvaises
167	Town water	Masculin	Petits business	26	Marié	Secondaire	Chretien	Oui	Secondaire	Masculin	3	1	Oui	Non	Non	Non	Oui	Non	Non	Non	Oui	Non	Non	Non	Non	Oui	Oui	Non	Non	Oui	Non	Non	Non	Régulièrement	Plus d'1an	MINSANTE	Non	1	2	2	Non	Oui	Non	Non	B	C	Endommagée	Oui	mauvaises
168	Town water	Masculin	fonctionnaire	52	Célibataire	Université	Chretien	Non	Universté	Masculin	5	2	Oui	Non	Non	Non	Oui	Non	Non	Non	Oui	Oui	Non	Non	Non	Oui	Oui	Non	Non	Oui	Oui	Non	Oui	Régulièrement	plus de 2 ans	Achat	Non	2	5	5	Non	Non	Oui	Non	C	C	Endommagée	Non	mauvaises
169	Town water	Masculin	Petits business	30	Marié	Secondaire	Chretien	Oui	Secondaire	Masculin	4	1	Oui	Non	Non	Non	Oui	Non	Non	Non	Oui	Non	Non	Non	Non	Oui	Oui	Non	Oui	Oui	Non	Non	Oui	Régulièrement	Moins de 6 mois	Don autre MINSANTE	Non	2	3	3	Non	Oui	Oui	Oui	B,C,D	C	Bon état	Oui	bonne
170	Town water	Masculin	Petits business	27	Célibataire	Secondaire	Musulman	Oui	Secondaire	Masculin	2	0	Oui	Non	Non	Oui	Oui	Non	Non	Non	Oui	Non	Non	Non	Non	Oui	Oui	Non	Non	Oui	Non	Non	Non	Régulièrement	plus de 2 ans	MINSANTE	Oui	1	1	1	Oui	Non	Non	Non	A	C	Bon état	Oui	moyenne
171	Town water	Masculin	Agriculteur	50	Marié	Sans niveau	Chretien	Oui	Sans niveau	Masculin	9	2	Oui	Non	Oui	Non	Non	Non	Non	Non	Oui	Non	Non	Non	Non	Oui	Oui	Non	Non	Oui	Non	Non	Non	Saison pluvieuse	plus de 2 ans	MINSANTE	Non	1	6	6	Non	Non	Non	Oui	D	C	Endommagée	Oui	moyenne
172	Town water	Masculin	Petits business		Marié	Secondaire	Chretien	Non	Secondaire	Masculin	6	0	Oui	Non	Non	Non	Oui	Non	Non	Non	Oui	Non	Non	Non	Non	Oui	Oui	Non	Non	Oui	Non	Non	Non	Régulièrement	plus de 2 ans	MINSANTE	Oui	6	4	4	Oui	Non	Non	Non	A	A	Endommagée	Non	mauvaises
173	Town water	Masculin	Petits business	30	Célibataire	Secondaire	Chretien	Oui	Secondaire	Masculin	2	1	Oui	Oui	Oui	Non	Oui	Non	Non	Non	Oui	Oui	Non	Non	Non	Oui	Oui	Non	Non	Oui	Oui	Oui	Oui	Régulièrement	Plus d'1an	MINSANTE	Oui	2	2	2	Oui	Non	Non	Non	A	C	Bon état	Non	moyenne
174	Town water	Masculin	fonctionnaire	58	Marié	Secondaire		Oui	Secondaire	Masculin	5	0	Oui	Non	Non	Non	Oui	Non	Non	Non	Oui	Non	Non	Non	Non	Oui	Non	Oui	Non	Oui	Non	Non	Non	Régulièrement	Plus de 6 mois	Achat	Non	1	3	3	Non	Oui	Non	Non	B	C	Endommagée	Non	moyenne
175	Town water	Masculin	Agriculteur	42	Marié	Primaire	Chretien	Non	Secondaire	Féminin	12	2	Oui	Non	Oui	Non	Non	Non	Non	Non	Oui	Non	Non	Non	Non	Oui	Oui	Non	Non	Oui	Non	Non	Non	Régulièrement	Plus d'1an	MINSANTE	Oui	4	3	4	Oui	Non	Non	Non	A	A	Endommagée	Oui	moyenne
176	Town water	Masculin	Agriculteur	48	Célibataire	Primaire	Chretien	Oui	Primaire	Masculin	7	0	Oui	Non	Oui	Non	Non	Non	Non	Non	Oui	Non	Non	Non	Non	Oui	Oui	Non	Non	Oui	Non	Non	Non	Régulièrement	plus de 2 ans	MINSANTE	Oui	4	4	4	Oui	Non	Non	Non	A	A	Endommagée	Oui	mauvaises
177	Town water	Masculin	Petits business	28	Célibataire	Université	Chretien	Oui	Universté	Masculin	1	0	Oui	Non	Non	Non	Non	Non	Non	Oui	Oui	Oui	Non	Non	Non	Non	Oui	Non	Non	Oui	Non	Non	Non	Régulièrement	Plus d'1an	Achat	Oui	1	1	1	Oui	Non	Non	Non	A	B	Bon état	Oui	bonne
178	Town water	Masculin	Agriculteur	43	Marié	Primaire	Chretien	Non	Secondaire	Féminin	8	3	Oui	Non	Oui	Non	Non	Oui	Non	Non	Oui	Non	Non	Non	Non	Oui	Non	Oui	Non	Oui	Non	Non	Non	Saison pluvieuse	plus de 2 ans	MINSANTE	Non	2	3	3	Non	Oui	Non	Oui	B,D	A,déchirées	Endommagée	Oui	moyenne
179	Town water	Masculin	fonctionnaire	45	Marié	Secondaire	Chretien	Oui	Secondaire	Masculin	11	2	Oui	Non	Oui	Non	Oui	Non	Non	Non	Oui	Non	Non	Non	Non	Oui	Oui	Non	Non	Oui	Oui	Non	Non	Saison pluvieuse	plus de 2 ans	MINSANTE	Non	2	4	4	Non	Oui	Non	Oui	B,D	C	Endommagée	Oui	bonne
180	Town water	Féminin	Petits business	31	Célibataire	Université	Chretien	Oui	Universté	Féminin	3	2	Oui	Non	Oui	Oui	Oui	Non	Non	Non	Oui	Non	Non	Non	Non	Non	Oui	Non	Non	Oui	Non	Non	Non	Régulièrement	Plus d'1an	Achat	Oui	1	1	1	Oui	Non	Non	Non	A	C	Bon état	Oui	bonne
181	Town water	Masculin	Petits business	33	Marié	Secondaire	Chretien	Oui	Secondaire	Masculin	4	1	Oui	Non	Oui	Oui	Non	Non	Non	Non	Oui	Non	Non	Non	Non	Oui	Oui	Oui	Non	Oui	Non	Oui	Oui	Régulièrement	Plus d'1an	MINSANTE	Oui	3	2	3	Non	Oui	Non	Oui	B,D	A,C	Endommagée	Oui	moyenne
182	Town water	Masculin	fonctionnaire	41	Marié	Université	Chretien	Oui	Universté	Masculin	3	1	Oui	Non	Oui	Oui	Oui	Non	Non	Non	Oui	Oui	Non	Non	Non	Non	Oui	Non	Non	Oui	Non	Non	Non	Régulièrement	Plus de 6 mois	Achat	Oui	2	2	2	Non	Oui	Non	Oui	B,D	A,B	Bon état	Oui	moyenne
183	Town water	Masculin	Petits business	59	Marié	Secondaire	Chretien	Oui	Secondaire	Masculin	6	0	Oui	Non	Oui	Oui	Non	Non	Non	Non	Oui	Non	Non	Non	Non	Oui	Non	Oui	Non	Oui	Non	Oui	Non	Régulièrement	Plus d'1an	MINSANTE	Oui	3	4	3	Oui	Non	Non	Non	A	A	Endommagée	Oui	moyenne
184	Town water	Féminin	Petits business	28	Célibataire	Secondaire	Chretien	Oui	Secondaire	Féminin	2	0	Oui	Non	Oui	Non	Oui	Non	Non	Non	Oui	Oui	Non	Non	Non	Oui	Non	Oui	Non	Oui	Non	Non	Oui	Saison pluvieuse	plus de 2 ans	MINSANTE	Oui	1	1	1	Non	Oui	Oui	Non	B,C	A	Bon état	Oui	bonne
185	Town water	Féminin	Petits business	46	Célibataire	Secondaire	Chretien	Non	Secondaire	Féminin	4	0	Oui	Non	Oui	Oui	Non	Non	Non	Non	Oui	Non	Non	Non	Non	Non	Oui	Non	Non	Oui	Non	Non	Non	Régulièrement	Plus d'1an	Achat	Oui	2	2	2	Non	Oui	Oui	Non	B,C	A	Endommagée	Oui	mauvaises
186	Town water	Masculin	Petits business	44	Marié	Secondaire	Chretien	Non	Universté	Féminin	6	2	Oui	Oui	Oui	Oui	Non	Non	Non	Non	Oui	Non	Non	Non	Non	Oui	Non	Oui	Non	Oui	Non	Non	Non	Régulièrement	Plus d'1an	MINSANTE	Oui	3	4	2	Non	Oui	Oui	Oui	B,C,D	A	Endommagée	Oui	bonne
187	Town water	Masculin	Petits business	62	Marié	Primaire	Chretien	Oui	Primaire	Masculin	9	2	Oui	Non	Non	Non	Non	Non	Oui	Non	Oui	Non	Non	Non	Non	Oui	Oui	Non	Non	Oui	Non	Oui	Non	Régulièrement	Plus d'1an	MINSANTE	Oui	4	3	4	Oui	Non	Non	Non	A	A	Endommagée	Oui	moyenne
188	Town water	Masculin	Agriculteur	72	Marié	Secondaire	Chretien	Oui	Secondaire	Masculin	11	0	Oui	Non	Oui	Non	Non	Non	Non	Non	Oui	Non	Non	Non	Non	Non	Oui	Non	Non	Oui	Non	Non	Non	Régulièrement	plus de 2 ans	MINSANTE	Oui	5	3	5	Non	Oui	Oui	Non	B,C	C	Endommagée	Oui	moyenne
189	Town water	Féminin	Petits business	45	Divorcé	Primaire	Chretien	Oui	Primaire	Féminin	6	1	Oui	Non	Oui	Non	Non	Non	Non	Non	Oui	Non	Non	Non	Non	Oui	Oui	Oui	Non	Oui	Non	Oui	Non	Régulièrement	Plus d'1an	Achat	Oui	3	3	3	Oui	Non	Non	Non	A	A	Endommagée	Oui	ras
190	Town water	Féminin	student	22	Célibataire	Secondaire	Chretien	Oui	Secondaire	Féminin	2	1	Oui	Non	Oui	Oui	Non	Non	Non	Non	Oui	Non	Non	Non	Non	Non	Oui	Non	Non	Oui	Non	Non	Non	Régulièrement	Plus d'1an	MINSANTE	Oui	1	1	1	Non	Oui	Non	Oui	B,D	A,B	Bon état	Oui	mauvaises
191	Town water	Masculin	fonctionnaire	38	Marié	Université	Musulman	Oui	Universté	Masculin	4	1	Oui	Non	Oui	Non	Oui	Non	Non	Non	Oui	Oui	Non	Non	Non	Non	Oui	Non	Non	Oui	Non	Non	Non	Régulièrement	Plus d'1an	Achat	Oui	2	2	2	Non	Oui	Oui	Oui	B,C,D	A	Bon état	Oui	moyenne
192	Town water	Féminin	Agriculteur	38	Célibataire	Secondaire	Chretien	Oui	Secondaire	Féminin	11	3	Oui	Non	Non	Non	Oui	Non	Non	Non	Oui	Non	Non	Non	Non	Oui	Oui	Non	Non	Oui	Non	Non	Non	Régulièrement	Plus de 6 mois	MINSANTE	Oui	4	3	3	Oui	Non	Non	Non	A	C	Bon état	Oui	mauvaises
193	Town water	Masculin	Petits business	46	Marié	Secondaire	Chretien	Oui	Secondaire	Masculin	5	1	Oui	Oui	Oui	Oui	Non	Non	Non	Non	Oui	Non	Non	Non	Non	Oui	Non	Oui	Non	Oui	Non	Oui	Oui	Régulièrement	Plus d'1an	Don autre MINSANTE	Oui	2	3	3	Oui	Non	Non	Non	A	A	Bon état	Oui	bonne
194	Town water	Masculin	Petits business	28	Célibataire	Secondaire	Chretien	Non	Secondaire	Masculin	3	0	Oui	Non	Oui	Non	Non	Non	Non	Non	non	Non	Non	Non	Oui	Oui	Oui	Non	Non	Oui	Non	Non	Non	Régulièrement	Moins de 6 mois	MINSANTE	Oui	1	1	1	Oui	Non	Non	Non	A	C	Bon état	Oui	ras
195	Town water	Masculin	Agriculteur	30	Marié	Secondaire	Chretien	Oui	Secondaire	Masculin	6	0	Oui	Non	Oui	Non	Non	Non	Non	Non	Oui	Non	Non	Non	Non	Oui	Oui	Oui	Non	Oui	Non	Non	Non	Régulièrement	plus de 2 ans	MINSANTE	Oui	5	5	5	Oui	Non	Non	Non	A	B	Endommagée	Oui	moyenne
196	Town water	Féminin	Petits business	40	Marié	Primaire	Chretien	Oui	Primaire	Féminin	4	1	Oui	Non	Oui	Non	Non	Non	Non	Non	Oui	Non	Non	Non	Non	Oui	Oui	Non	Non	Oui	Non	Non	Non	Régulièrement	plus de 2 ans	MINSANTE	Non	2	3	3	Non	Oui	Non	Oui	D	C	Endommagée	Oui	moyenne
197	Town water	Féminin	Petits business	35	Marié	Secondaire	Chretien	Oui	Secondaire	Féminin	6	0	Oui	Non	Non	Non	Oui	Non	Non	Non	Oui	Oui	Non	Non	Non	Oui	Oui	Non	Non	Oui	Non	Non	Non	Régulièrement	plus de 2 ans	MINSANTE	Oui	3	3	3	Oui	Non	Non	Non	A	C	Endommagée	Oui	mauvaises
198	Town water	Masculin	fonctionnaire	70	Marié	Secondaire	Chretien	Oui	Secondaire	Masculin	11	3	Oui	Non	Oui	Non	Non	Oui	Non	Non	Oui	Non	Non	Non	Non	Non	Oui	Non	Non	Oui	Non	Non	Non	Régulièrement	plus de 2 ans	MINSANTE	Oui	5	6	5	Oui	Non	Non	Non	A	B	Bon état	Oui	moyenne
231	CEBEC	Masculin	fonctionnaire	50	Marié	Université	Chretien	Non	Secondaire	Féminin	6	1	Oui	Non	Oui	Non	Non	Oui	Non	Non	Oui	Non	Non	Non	Non	Oui	Non	Oui	Non	Oui	Non	Oui	Oui	Régulièrement	plus de 2 ans	MINSANTE	Oui	3	2	3	Non	Oui	Oui	Oui	B,C,D	A	Endommagée	Oui	bonne
232	CEBEC	Masculin	Agriculteur	45	Marié	Primaire	Chretien	Oui	Primaire	Masculin	5	0	Oui	Oui	Oui	Oui	Non	Non	Non	Non	Oui	Oui	Non	Non	Non	Oui	Non	Oui	Non	Oui	Non	Oui	Oui	Régulièrement	plus de 2 ans	MINSANTE	Oui	2	2	2	Non	Oui	Oui	Non	B,C	A	Endommagée	Oui	moyenne
233	CEBEC	Masculin	fonctionnaire	85	Marié	Secondaire	Chretien	Non	Secondaire	Masculin	10	2	Oui	Oui	Oui	Oui	Oui	Non	Non	Non	Oui	Non	Non	Non	Non	Non	Oui	Non	Non	Oui	Non	Oui	Non	Régulièrement	Plus d'1an	MINSANTE	Oui	5	4	5	Oui	Non	Non	Non	A	A,C	Bon état	Oui	mauvaises
234	CEBEC	Masculin	Petits business	41	Célibataire	Secondaire		Oui	Secondaire	Masculin	3	1	Oui	Non	Oui	Non	Non	Oui	Non	Non	Oui	Non	Non	Non	Non	Oui	Oui	Non	Oui	Oui	Non	Non	Oui	Régulièrement	Plus d'1an	Achat	Oui	2	2	2	Oui	Non	Non	Non	A	C	Bon état	Oui	mauvaises
235	CEBEC	Masculin	Petits business	38	Célibataire	Secondaire	Chretien	Oui	Secondaire	Masculin	5	0	Oui	Non	Non	Non	Oui	Non	Non	Non	Oui	Oui	Non	Non	Non	Oui	Oui	Non	Non	Oui	Non	Non	Non	Régulièrement	plus de 2 ans	MINSANTE	Non	2	4	4	Non	Oui	Non	Oui	C	C	Endommagée	Oui	bonne
236	CEBEC	Masculin	fonctionnaire	47	Marié	Secondaire	Chretien	Non	Secondaire	Masculin	5	2	Oui	Non	Non	Non	Oui	Non	Non	Non	Oui	Non	Non	Non	Non	Oui	Oui	Non	Non	Oui	Non	Non	Non	Régulièrement	Plus d'1an	MINSANTE	Non	2	4	4	Non	Non	Oui	Non	C	C	Bon état	Oui	moyenne
351	CEBEC	Masculin	Petits business	33	Marié	Secondaire	Chretien	Oui	Secondaire	Masculin	2	0	Oui	Oui	Non	Non	Non	Non	Non	Non	Oui	Non	Non	Non	Non	Oui	Oui	Non	Non	Oui	Non	Non	Oui	Régulièrement	plus de 2 ans	MINSANTE	Non	1	2	2	Non	Oui	Non	Non	B	C	Endommagée	Oui	mauvaises
352	CEBEC	Masculin	Petits business	49	Marié	Secondaire	Chretien	Oui	Secondaire	Masculin	8	3	Oui	Non	Non	Non	Non	Non	Oui	Non	non	Non	Oui	Non	Non	Oui	Oui	Non	Non	Oui	Oui	Non	Non	Régulièrement	plus de 2 ans	MINSANTE	Oui	4	4	4	Non	Non	Oui	Non	C	C	Bon état	Oui	moyenne
353	CEBEC	Féminin	Petits business	31	Marié	Secondaire	Chretien	Non	Secondaire	Masculin	3	1	Oui	Non	Non	Non	Non	Oui	Non	Non	non	Non	Non	Non	Oui	Oui	Oui	Oui	Non	Non	Non	Non	Non	Non	RAS	Non	Non	0	2	2	Non	Non	Non	Non	Personne	C	RAS	Non	mauvaises
354	CEBEC	Féminin	Petits business	47	Célibataire	Secondaire	Chretien	Non	Secondaire	Féminin	5	0	Oui	Non	Oui	Oui	Non	Non	Non	Non	Oui	Non	Non	Non	Non	Oui	Oui	Non	Non	Oui	Non	Non	Non	Rarement	plus de 2 ans	MINSANTE	Non	3	4	4	Non	Oui	Oui	Non	B,C	Insuffisant	Endommagée	Oui	moyenne
355	CEBEC	Masculin	Petits business	38	Célibataire	Université	Musulman	Non	Secondaire	Féminin	3	1	Oui	Non	Oui	Non	Oui	Non	Non	Non	Oui	Oui	Non	Non	Non	Oui	Oui	Non	Non	Oui	Non	Non	Oui	Régulièrement	plus de 2 ans	MINSANTE	Oui	2	2	2	Oui	Non	Non	Non	A	C	Endommagée	Oui	bonne
356	CEBEC	Masculin	Agriculteur	60	Marié	Secondaire	Chretien	Non	Secondaire	Féminin	5	2	Oui	Non	Oui	Non	Non	Oui	Non	Non	Oui	Non	Non	Non	Non	Oui	Non	Oui	Non	Oui	Non	Oui	Non	Régulièrement	plus de 2 ans	MINSANTE	Non	1	3	4	Non	Non	Non	Oui	D	C	Endommagée	Oui	moyenne
357	CEBEC	Féminin	Petits business	58	Marié	Sans niveau	Chretien	Non	Secondaire	Féminin	7	1	Oui	Non	Oui	Non	Oui	Non	Non	Non	Oui	Non	Non	Non	Non	Oui	Oui	Non	Non	Oui	Non	Oui	Non	Régulièrement	plus de 2 ans	Achat	Non	2	3	5	Non	Non	Non	Oui	D	C	Endommagée	Oui	mauvaises
358	CEBEC	Masculin	fonctionnaire	37	Marié	Université	Chretien	Non	Universté	Féminin	4	1	Oui	Oui	Oui	Oui	Oui	Oui	Non	Non	Oui	Non	Non	Non	Non	Oui	Oui	Non	Non	Oui	Non	Non	Non	Régulièrement	plus de 2 ans	MINSANTE	Oui	3	3	3	Oui	Non	Non	Non	A	C	Endommagée	Oui	moyenne
346	Washintown	Masculin	Agriculteur	49	Marié	Secondaire	Chretien	Oui	Secondaire	Masculin	4	0	Oui	Non	Non	Oui	Oui	Non	Non	Non	Oui	Non	Non	Non	Non	Oui	Oui	Non	Non	Oui	Non	Non	Non	Régulièrement	plus de 2 ans	Achat	Non	1	2	3	Non	Non	Oui	Non	C	C	Endommagée	Oui	moyenne
347	Washintown	Féminin	Petits business	29	Célibataire	Secondaire	Chretien	Oui	Secondaire	Féminin	6	2	Oui	Non	Oui	Non	Non	Oui	Non	Non	Oui	Non	Non	Non	Non	Oui	Oui	Non	Non	Oui	Non	Non	Non	Régulièrement	plus de 2 ans	MINSANTE	Non	3	3	4	Non	Oui	Oui	Non	B,D	C	Endommagée	Oui	mauvaises
348	Washintown	Masculin	Petits business	30	Célibataire	Secondaire		Oui	Secondaire	Masculin	2	0	Oui	Oui	Oui	Non	Non	Non	Non	Non	non	Non	Oui	Non	Non	Oui	Oui	Non	Non	Oui	Non	Non	Non	Régulièrement	plus de 2 ans	MINSANTE	Non	1	2	2	Non	Oui	Non	Non	B	C	Endommagée	Oui	mauvaises
237	Washintown	Masculin	Petits business	25	Célibataire	Université	Chretien	Oui	Universté	Masculin	1	0	Oui	Oui	Oui	Oui	Oui	Oui	Non	Non	Oui	Non	Non	Non	Non	Oui	Oui	Non	Non	Oui	Non	Non	Non	Régulièrement	plus de 2 ans	MINSANTE	Oui	1	1	1	Oui	Non	Non	Non	A	B	Endommagée	Oui	bonne
238	Washintown	Masculin	Petits business	39	Marié	Secondaire	Chretien	Oui	Secondaire	Masculin	4	0	Oui	Non	Non	Non	Oui	Oui	Non	Non	Oui	Non	Non	Non	Non	Oui	Oui	Oui	Non	Oui	Non	Non	Non	Régulièrement	plus de 2 ans	MINSANTE	Non	1	3	3	Non	Oui	Non	Non	B	C	Endommagée	Oui	mauvaises
239	Washintown	Masculin	Petits business	43	Marié	Secondaire	Chretien	Oui	Secondaire	Masculin	5	0	Oui	Non	Non	Non	Non	Non	Oui	Non	Oui	Non	Non	Non	Non	Oui	Oui	Non	Non	Non	Oui	Non	Non	Non	RAS	Non	Non	0	3	3	Non	Non	Non	Non	Personne	C	RAS	Oui	mauvaises
240	Washintown	Masculin	Agriculteur	55	Marié	Primaire	Chretien	Oui	Primaire	Masculin	3	0	Oui	Oui	Non	Non	Non	Non	Non	Non	Oui	Non	Non	Non	Non	Oui	Non	Oui	Non	Oui	Non	Non	Non	Régulièrement	Moins de 6 mois	Achat	Non	1	3	3	Non	Non	Oui	Non	C	C	Bon état	Oui	mauvaises
241	Baloua	Masculin	Petits business	41	Célibataire	Sans niveau	Chretien	Non	Secondaire	Masculin	9	0	Oui	Non	Oui	Non	Non	Non	Non	Non	Oui	Non	Non	Non	Non	Non	Oui	Non	Non	Non	Non	Non	Non	Non	RAS	Non	Non	0	6	6	Non	Non	Non	Non	Personne	C	RAS	Oui	bonne
242	Baloua	Féminin	Ménagère	28	Célibataire	Secondaire	Chretien	Non	Secondaire	Masculin	2	0	Oui	Non	Non	Non	Oui	Non	Non	Non	Oui	Non	Non	Non	Non	Oui	Oui	Oui	Non	Oui	Non	Non	Non	Régulièrement	plus de 2 ans	MINSANTE	Non	1	2	2	Non	Oui	Non	Non	B	C	Endommagée	Oui	moyenne
243	Baloua	Masculin	Petits business	50	Marié	Sans niveau	Musulman	Oui	Sans niveau	Masculin	2	0	Oui	Non	Non	Non	Non	Oui	Non	Non	Oui	Non	Non	Non	Non	Oui	Oui	Non	Non	Oui	Non	Non	Non	Régulièrement	plus de 2 ans	MINSANTE	Non	1	2	2	Non	Oui	Non	Non	B	Insuffisant	Endommagée	Oui	moyenne
244	Baloua	Masculin	Petits business	39	Célibataire	Secondaire	Chretien	Oui	Secondaire	Masculin	1	0	Oui	Non	Non	Oui	Oui	Non	Non	Non	Oui	Non	Non	Non	Non	Oui	Oui	Oui	Non	Oui	Non	Non	Non	Régulièrement	plus de 2 ans	MINSANTE	Oui	1	1	1	Oui	Non	Non	Non	A	A	Bon état	Oui	bonne
245	Baloua	Masculin	Agriculteur	32	Marié	Secondaire	Chretien	Non	Secondaire	Féminin	6	1	Oui	Oui	Oui	Non	Oui	Oui	Non	Non	Oui	Non	Non	Non	Non	Oui	Oui	Oui	Non	Oui	Non	Non	Non	Régulièrement	plus de 2 ans	MINSANTE	Non	1	5	5	Non	Oui	Non	Non	B	Déchirées	Endommagée	Oui	mauvaises
246	Baloua	Masculin	Agriculteur	61	Marié	Sans niveau	Chretien	Oui	Sans niveau	Masculin	7	0	Oui	Non	Non	Non	Non	Oui	Non	Non	Oui	Non	Non	Non	Non	Oui	Oui	Non	Non	Oui	Non	Non	Non	Régulièrement	Plus de 6 mois	Achat	Non	2	3	3	Non	Oui	Non	Oui	B,D	C	Endommagée	Oui	mauvaises
247	Baloua	Masculin	Agriculteur	72	Marié	Sans niveau	Chretien	Non	Secondaire	Féminin	4	0	Oui	Non	Oui	Non	Oui	Non	Non	Non	Oui	Non	Non	Non	Non	Oui	Oui	Non	Non	Oui	Non	Non	Non	Régulièrement	plus de 2 ans	MINSANTE	Non	2	6	6	Non	Oui	Non	Non	B	C	Endommagée	Oui	moyenne
248	Baloua	Masculin	fonctionnaire	28	Marié	Université	Chretien	Oui	Universté	Féminin	4	0	Oui	Non	Non	Non	Oui	Oui	Non	Non	Oui	Non	Non	Non	Non	Oui	Oui	Non	Non	Oui	Non	Non	Non	Régulièrement	plus de 2 ans	MINSANTE	Non	2	3	3	Non	Oui	Non	Non	B	C	Endommagée	Oui	mauvaises
249	Baloua	Masculin	Petits business	61	Marié	Secondaire	Chretien	Non	Secondaire	Masculin	4	0	Oui	Non	Oui	Non	Non	Non	Non	Non	Oui	Non	Non	Non	Non	Oui	Oui	Non	Non	Oui	Non	Non	Non	Régulièrement	plus de 2 ans	MINSANTE	Non	1	3	3	Non	Oui	Non	Non	B	C	Bon état	Oui	mauvaises
250	Baloua	Masculin	Petits business	57	Marié	Université	Chretien	Oui	Universté	Masculin	3	1	Oui	Non	Oui	Non	Oui	Non	Non	Non	Oui	Non	Non	Non	Non	Oui	Oui	Non	Non	Oui	Non	Non	Oui	Régulièrement	Plus d'1an	Don autre MINSANTE	Oui	2	2	2	Oui	Non	Non	Non	A	C	Endommagée	Oui	moyenne
388	Baloua	Masculin	Petits business	69	Veuf	Secondaire	Chretien	Non	Secondaire	Féminin	4	0	Oui	Non	Oui	Non	Non	Oui	Non	Non	Oui	Non	Non	Non	Non	Oui	Oui	Non	Non	Oui	Non	Non	Non	Rarement	plus de 2 ans	MINSANTE	Oui	3	3	3	Oui	Non	Non	Non	A	C	Endommagée	Oui	mauvaises
389	Baloua	Féminin	Petits business	48	Marié	Secondaire	Chretien	Non	Secondaire	Masculin	3	1	Oui	Non	Non	Non	Oui	Non	Non	Non	Oui	Non	Non	Non	Non	Non	Non	Oui	Non	Oui	Non	Non	Oui	Régulièrement	Plus de 6 mois	Achat	Oui	2	2	2	Oui	Non	Non	Non	A	C	Bon état	Oui	mauvaises
390	Baloua	Masculin	Petits business	32	Célibataire	Secondaire	Chretien	Oui	Secondaire	Masculin	2	0	Oui	Non	Non	Non	Oui	Non	Non	Non	Oui	Non	Non	Non	Non	Oui	Oui	Non	Non	Oui	Non	Non	Non	Saison pluvieuse	Moins de 6 mois	MINSANTE	Oui	1	1	1	Oui	Non	Non	Non	A	B	Endommagée	Oui	mauvaises
137	Moussa-city	Féminin	Petits business	56	Marié	Secondaire	Chretien	Oui	Secondaire	Féminin	3	0	Oui	Oui	Oui	Oui	Oui	Non	Non	Non	Oui	Non	Non	Non	Non	Oui	Oui	Non	Non	Oui	Non	Non	Oui	Régulièrement	plus de 2 ans	Don autre MINSANTE	Oui	2	3	4	Non	Oui	Non	Non	B	C	Bon état	Non	mauvaises
138	Moussa-city	Masculin	Agriculteur	60	Marié	Secondaire	Chretien	Oui	Secondaire	Masculin	10	0	Oui	Non	Oui	Non	Non	Non	Non	Non	Oui	Non	Non	Non	Non	Oui	Oui	Non	Non	Oui	Non	Non	Oui	Régulièrement	plus de 2 ans	Achat	Non	2	5	6	Non	Non	Non	Oui	D	C	Endommagée	Oui	bonne
139	Moussa-city	Masculin	Agriculteur	56	Marié	Secondaire	Chretien	Oui	Secondaire	Masculin	2	0	Oui	Non	Oui	Oui	Non	Non	Non	Non	Oui	Non	Non	Non	Non	Oui	Oui	Non	Non	Oui	Non	Oui	Non	Régulièrement	plus de 2 ans	Achat	Non	1	2	2	Non	Non	Non	Non	E	C	Endommagée	Oui	moyenne
140	Moussa-city	Masculin	Petits business	33	Célibataire	Secondaire	Chretien	Oui	Secondaire	Masculin	2	0	Oui	Non	Oui	Non	Oui	Non	Non	Non	Oui	Non	Non	Non	Non	Oui	Oui	Non	Non	Oui	Non	Non	Non	Régulièrement	Plus d'1an	MINSANTE	Non	0	1	1	Non	Non	Non	Non	Personne	C	RAS	Oui	moyenne
141	Moussa-city	Masculin	Agriculteur	37	Célibataire	Secondaire	Chretien	Oui	Secondaire	Masculin	3	1	Oui	Non	Oui	Non	Oui	Non	Non	Non	Oui	Non	Non	Non	Non	Oui	Oui	Non	Non	Oui	Non	Non	Non	Régulièrement	Plus d'1an	MINSANTE	Non	1	2	2	Non	Non	Non	Non	Personne	C	Endommagée	Oui	mauvaises
142	Moussa-city	Féminin	fonctionnaire	56	Marié	Secondaire	Chretien	Oui	Secondaire	Féminin	3	0	Oui	Oui	Oui	Oui	Oui	Non	Non	Non	Oui	Non	Non	Non	Non	Oui	Oui	Non	Non	Oui	Non	Non	Oui	Régulièrement	plus de 2 ans	MINSANTE	Oui	3	3	3	Non	Non	Oui	Non	C	C	Endommagée	Oui	bonne
265	Mak-Est	Masculin	Agriculteur	61	Marié	Primaire	Chretien	Oui	Primaire	Masculin	3	1	Oui	Non	Oui	Non	Non	Non	Non	Non	Oui	Non	Non	Non	Non	Oui	Oui	Non	Non	Oui	Non	Non	Non	Régulièrement	plus de 2 ans	MINSANTE	Oui	1	1	1	Oui	Non	Non	Non	A	A	Endommagée	Oui	mauvaises
266	Mak-Est	Féminin	Ménagère	40	Célibataire	Primaire	Chretien	Non	Secondaire	Féminin	5	1	Oui	Non	Oui	Non	Oui	Non	Non	Non	Oui	Non	Non	Non	Non	Oui	Non	Oui	Non	Oui	Non	Non	Non	Saison pluvieuse	Plus de 2 ans	MINSANTE	Non	3	3	4	Non	Non	Oui	Non	C	C	Bon état	Oui	moyenne
267	Mak-Est	Masculin	Agriculteur	60	Marié	Secondaire	Chretien	Non	Secondaire	Féminin	12	1	Oui	Non	Non	Non	Oui	Non	Non	Non	Oui	Non	Non	Non	Non	Oui	Oui	Non	Non	Oui	Non	Non	Non	Saison sèche	plus de 2 ans	MINSANTE	Oui	3	3	3	Oui	Non	Non	Non	A	A	Bon état	Oui	mauvaises
268	Mak-Est	Féminin	Agriculteur	46	Célibataire	Primaire	Chretien	Oui	Primaire	Féminin	2	0	Oui	Non	Non	Non	Non	Oui	Non	Non	Oui	Non	Non	Non	Oui	Oui	Oui	Oui	Non	Oui	Non	Non	Non	Régulièrement	plus de 2 ans	MINSANTE	Non	1	2	2	Non	Oui	Non	Non	B	C	Endommagée	Oui	moyenne
269	Mak-Est	Masculin	Petits business	29	Célibataire	Université	Chretien	Non	Secondaire	Masculin	4	2	Oui	Non	Oui	Non	Non	Oui	Non	Non	non	Non	Oui	Non	Non	Oui	Oui	Non	Non	Oui	Non	Non	Non	Régulièrement	plus de 2 ans	MINSANTE	Non	2	4	4	Non	Oui	Oui	Non	B,C	C	Endommagée	Oui	bonne
270	Mak-Est	Féminin	Petits business	50	Célibataire	Sans niveau	Chretien	Oui	Sans niveau	Féminin	4	0	Oui	Non	Non	Oui	Non	Non	Non	Non	Oui	Non	Non	Non	Non	Oui	Oui	Non	Non	Oui	Non	Non	Non	Régulièrement	Plus de 6 mois	Achat	Oui	2	2	2	Non	Non	Oui	Non	C	C	Endommagée	Oui	mauvaises
271	Mak-Est	Féminin	Petits business	53	Marié	Secondaire	Chretien	Oui	Secondaire	Féminin	5	1	Oui	Non	Oui	Non	Non	Non	Non	Non	Oui	Non	Non	Non	Non	Oui	Oui	Oui	Non	Oui	Non	Oui	Non	Saison pluvieuse	plus de 2 ans	MINSANTE	Non	2	4	4	Non	Non	Non	Oui	D	C	Endommagée	Oui	mauvaises
272	Mak-Est	Féminin	Petits business	56	Marié	Primaire	Musulman	Oui	Primaire	Féminin	4	0	Oui	Non	Oui	Non	Non	Non	Non	Non	Oui	Non	Non	Non	Non	Oui	Oui	Non	Non	Oui	Oui	Non	Non	Régulièrement	plus de 2 ans	Achat	Non	1	3	3	Non	Oui	Non	Non	B	C	Endommagée	Oui	moyenne
273	Mak-Est	Féminin	Petits business	48	Marié	Secondaire	Chretien	Oui	Secondaire	Féminin	6	1	Oui	Non	Oui	Oui	Oui	Non	Non	Non	Oui	Non	Non	Non	Non	Oui	Oui	Non	Non	Oui	Non	Non	Oui	Régulièrement	Plus de 6 mois	Achat	Oui	3	3	3	Oui	Non	Non	Non	A	C	Endommagée	Oui	mauvaises
274	Mak-Est	Masculin	Agriculteur	50	Marié	Secondaire	Chretien	Oui	Secondaire	Masculin	6	2	Oui	Non	Non	Oui	Non	Non	Non	Non	Oui	Non	Non	Non	Non	Oui	Oui	Non	Non	Oui	Oui	Non	Non	Régulièrement	plus de 2 ans	MINSANTE	Oui	3	3	3	Non	Non	Non	Oui	D	C	Endommagée	Oui	moyenne
275	Mak-Est	Masculin	Petits business	53	Marié	Primaire	Chretien	Oui	Primaire	Masculin	4	1	Oui	Non	Oui	Oui	Non	Non	Non	Non	Oui	Non	Non	Non	Non	Oui	Oui	Non	Non	Oui	Non	Non	Non	Régulièrement	Plus d'1an	MINSANTE	Non	1	3	4	Non	Non	Oui	Non	C	C	Endommagée	Oui	mauvaises
276	Mak-Est	Féminin	Ménagère	36	Marié	Secondaire	Chretien	Oui	Secondaire	Féminin	9	2	Oui	Non	Non	Non	Oui	Non	Non	Non	Oui	Non	Non	Non	Non	Oui	Oui	Oui	Non	Oui	Non	Oui	Non	Saison pluvieuse	plus de 2 ans	MINSANTE	Non	2	5	5	Non	Non	Non	Oui	B	C	Endommagée	Oui	bonne
277	Mak-Est	Masculin	Petits business	40	Marié	Primaire	Chretien	Oui	Primaire	Masculin	5	0	Oui	Non	Non	Non	Oui	Non	Non	Non	Oui	Non	Non	Non	Non	Oui	Oui	Non	Non	Oui	Non	Non	Non	Régulièrement	plus de 2 ans	MINSANTE	Non	2	2	2	Oui	Non	Non	Non	A	A	Endommagée	Oui	moyenne
278	Mak-Est	Féminin	Ménagère	65	Marié	Primaire	Chretien	Oui	Primaire	Féminin	9	1	Oui	Oui	Oui	Non	Non	Non	Oui	Non	Oui	Non	Non	Non	Non	Oui	Oui	Non	Oui	Oui	Non	Non	Non	Saison pluvieuse	plus de 2 ans	MINSANTE	Non	2	3	6	Non	Non	Oui	Non	C	C	Endommagée	Oui	bonne
279	Mak-Est	Masculin	Petits business	41	Marié	Sans niveau	Chretien	Oui	Sans niveau	Masculin	5	2	Oui	Non	Non	Non	Non	Non	Oui	Non	non	Non	Non	Non	Non	Oui	Oui	Oui	Non	Non	Non	Non	Non	Non	RAS	Non	Non	0	4	4	Non	Non	Non	Non	Personne	C	RAS	Oui	bonne
280	Mak-Est	Masculin	Petits business	67	Marié	Primaire	Paien	Oui	Primaire	Masculin	6	2	Oui	Non	Non	Non	Non	Oui	Non	Non	Oui	Non	Non	Non	Non	Oui	Oui	Non	Non	Oui	Non	Non	Non	Saison sèche	Plus d'1an	MINSANTE	Non	2	4	4	Non	Oui	Non	Oui	B,D	C	Endommagée	Oui	moyenne
281	Mak-Est	Masculin	student	22	Célibataire	Secondaire	Chretien	Oui	Secondaire	Masculin	1	0	Oui	Non	Non	Non	Oui	Non	Non	Non	Oui	Non	Non	Non	Non	Oui	Oui	Non	Non	Oui	Non	Non	Non	Régulièrement	plus de 2 ans	Achat	Non	1	1	1	Oui	Non	Non	Non	A	C	Endommagée	Oui	mauvaises
282	Mak-Est	Masculin	Agriculteur	39	Célibataire	Secondaire	Chretien	Oui	Secondaire	Masculin	2	0	Oui	Non	Non	Non	Oui	Non	Non	Non	Oui	Non	Non	Non	Non	Oui	Oui	Non	Non	Non	Non	Non	Oui	Non	RAS	Non	Non	0	1	1	Non	Non	Non	Non	Personne	C	RAS	Oui	moyenne
283	Mak-Est	Féminin	Ménagère	45	Marié	Secondaire	Chretien	Oui	Secondaire	Féminin	10	3	Oui	Oui	Non	Non	Oui	Non	Non	Non	Oui	Non	Non	Non	Non	Oui	Oui	Non	Non	Oui	Non	Non	Non	Saison pluvieuse	plus de 2 ans	MINSANTE	Non	2	3	7	Non	Non	Oui	Non	C	C	Endommagée	Oui	bonne
284	Mak-Est	Féminin	Ménagère	40	Marié	Secondaire	Chretien	Oui	Secondaire	Féminin	6	0	Oui	Non	Oui	Non	Non	Non	Non	Non	Oui	Non	Non	Non	Non	Oui	Oui	Oui	Oui	Oui	Non	Oui	Non	Régulièrement	plus de 2 ans	MINSANTE	Non	2	5	5	Non	Oui	Non	Non	B	C	Endommagée	Oui	bonne
285	Mak-Est	Féminin	Ménagère	31	Marié	Université	Chretien	Oui	Universté	Féminin	5	2	Oui	Non	Oui	Oui	Non	Non	Non	Non	Oui	Non	Non	Non	Non	Non	Oui	Non	Non	Oui	Non	Non	Non	Saison pluvieuse	Moins de 6 mois	Achat	Oui	4	3	4	Oui	Non	Non	Non	A	B	Endommagée	Oui	moyenne
286	Mak-Est	Masculin	Agriculteur	36	Marié	Secondaire	Chretien	Oui	Secondaire	Masculin	6	2	Oui	Non	Non	Non	Non	Non	Oui	Non	Oui	Non	Non	Non	Non	Oui	Oui	Non	Non	Non	Non	Non	Non	Non	RAS	Non	Non	0	3	3	Non	Non	Non	Non	Personne	C	RAS	Oui	bonne
287	Mak-Est	Féminin	Petits business	38	Célibataire	Secondaire	Chretien	Oui	Secondaire	Féminin	10	2	Oui	Oui	Oui	Oui	Oui	Non	Non	Non	Oui	Oui	Non	Non	Non	Oui	Oui	Non	Non	Oui	Non	Oui	Non	Régulièrement	plus de 2 ans	Achat	Non	1	4	6	Non	Oui	Non	Non	Personne	C	Endommagée	Oui	bonne
288	Mak-Est	Masculin	Agriculteur	41	Marié	Primaire	Chretien	Oui	Primaire	Masculin	2	0	Oui	Non	Non	Non	Non	Non	Oui	Non	Oui	Non	Non	Non	Non	Oui	Oui	Non	Non	Oui	Non	Non	Non	Régulièrement	plus de 2 ans	Achat	Non	1	2	2	Non	Non	Oui	Non	C	B,C	Endommagée	Oui	bonne
289	Mak-Est	Masculin	Agriculteur	50	Marié	Secondaire	Chretien	Oui	Secondaire	Masculin	4	0	Oui	Non	Non	Non	Oui	Non	Non	Non	Oui	Oui	Non	Non	Non	Oui	Oui	Non	Non	Oui	Non	Non	Non	Régulièrement	plus de 2 ans	MINSANTE	Non	1	2	3	Non	Non	Oui	Non	C	C	Endommagée	Oui	mauvaises
290	Mak-Est	Masculin	Petits business	26	Célibataire	Université	Chretien	Oui	Universté	Masculin	3	1	Oui	Non	Oui	Oui	Non	Non	Non	Non	Oui	Non	Non	Non	Non	Oui	Oui	Oui	Non	Oui	Non	Oui	Non	Régulièrement	plus de 2 ans	Achat	Oui	1	1	1	Oui	Non	Non	Non	A	C	Bon état	Oui	bonne
291	Mak-Est	Féminin	Petits business	28	Célibataire	Université	Chretien	Oui	Universté	Féminin	3	0	Oui	Non	Non	Non	Oui	Non	Non	Non	Oui	Oui	Non	Non	Non	Non	Oui	Non	Non	Oui	Non	Non	Non	Régulièrement	plus de 2 ans	Don autre MINSANTE	Oui	2	3	3	Oui	Non	Non	Non	A	C	Bon état	Oui	bonne
292	Mak-Est	Féminin	Petits business	30	Célibataire	Primaire	Chretien	Non	Secondaire	Féminin	5	0	Oui	Non	Non	Non	Oui	Non	Non	Non	Oui	Non	Non	Non	Non	Oui	Oui	Non	Non	Oui	Non	Non	Non	Régulièrement	Plus de 6 mois	Achat	Non	3	3	4	Non	Non	Oui	Non	C	B	Endommagée	Oui	mauvaises
293	Mak-Est	Féminin	Agriculteur	47	Marié	Primaire	Chretien	Oui	Primaire	Féminin	4	1	Oui	Non	Oui	Oui	Oui	Non	Non	Non	Oui	Non	Non	Non	Non	Oui	Oui	Non	Non	Oui	Non	Oui	Non	Régulièrement	plus de 2 ans	Achat	Oui	3	3	3	Non	Non	Non	Non	D	C	Endommagée	Non	moyenne
294	Mak-Est	Masculin	Agriculteur	46	Marié	Secondaire	Chretien	Oui	Secondaire	Féminin	10	3	Oui	Non	Non	Non	Oui	Non	Non	Non	Oui	Non	Non	Non	Non	Oui	Oui	Non	Non	Oui	Non	Non	Non	Régulièrement	plus de 2 ans	Achat	Non	2	3	4	Non	Non	Non	Oui	D	C	Endommagée	Oui	mauvaises
295	Mak-Est	Masculin	Petits business	50	Marié	Secondaire	Musulman	Oui	Secondaire	Masculin	4	0	Oui	Oui	Non	Non	Non	Non	Non	Non	Oui	Non	Non	Non	Non	Oui	Oui	Non	Non	Oui	Oui	Non	Non	Régulièrement	plus de 2 ans	Achat	Non	4	4	4	Oui	Non	Non	Non	A	C	Endommagée	Oui	moyenne
296	Mak-Est	Masculin	Agriculteur	43	Marié	Université	Chretien	Oui	Universté	Masculin	5	1	Oui	Non	Oui	Non	Oui	Non	Non	Non	Oui	Non	Non	Non	Non	Non	Oui	Non	Non	Oui	Non	Non	Non	Régulièrement	Moins de 6 mois	MINSANTE	Oui	3	3	3	Oui	Non	Non	Non	A	C	Bon état	Oui	bonne
297	Mak-Est	Masculin	fonctionnaire	39	Marié	Secondaire	Chretien	Oui	Secondaire	Masculin	6	2	Oui	Non	Non	Non	Oui	Non	Non	Non	Oui	Non	Non	Non	Non	Oui	Oui	Non	Non	Oui	Non	Non	Oui	Régulièrement	Moins de 6 mois	Achat	Non	1	2	3	Non	Non	Non	Oui	D	B	Endommagée	Oui	moyenne
298	Mak-Est	Féminin	Petits business	42	Célibataire	Sans niveau	Chretien	Oui	Secondaire	Féminin	1	0	Oui	Non	Oui	Non	Non	Non	Non	Non	Oui	Non	Non	Non	Non	Oui	Non	Oui	Non	Oui	Non	Non	Non	Saison pluvieuse	Moins de 6 mois	MINSANTE	Oui	1	1	1	Oui	Non	Non	Non	A	A	Bon état	Oui	mauvaises
299	Mak-Est	Masculin	Petits business	25	Célibataire	Secondaire	Chretien	Oui	Secondaire	Masculin	1	0	Oui	Non	Non	Non	Oui	Non	Non	Non	Oui	Non	Non	Non	Non	Oui	Non	Oui	Non	Oui	Non	Non	Non	Saison sèche	Moins de 6 mois	Achat	Oui	1	1	1	Oui	Non	Non	Non	A	C	Bon état	Oui	mauvaises
300	Mak-Est	Masculin	fonctionnaire	52	Marié	Secondaire	Chretien	Oui	Secondaire	Masculin	6	1	Oui	Non	Non	Non	Oui	Non	Non	Non	Oui	Non	Non	Non	Non	Oui	Oui	Oui	Non	Oui	Non	Non	Non	Régulièrement	plus de 2 ans	Don autre MINSANTE	Non	1	4	4	Non	Non	Oui	Non	C	B	Bon état	Oui	moyenne
326	Mak-Est	Masculin	Petits business	46	Célibataire	Secondaire	Chretien	Non	Secondaire	Masculin	5	0	Oui	Non	Non	Non	Oui	Non	Non	Non	Oui	Non	Non	Non	Non	Oui	Oui	Non	Non	Non	Oui	Non	Oui	Non	RAS	Non	Non	0	2	3	Non	Non	Non	Non	Personne	C	RAS	Oui	mauvaises
327	Mak-Est	Féminin	Petits business	42	Célibataire	Primaire	Chretien	Oui	Primaire	Féminin	2	0	Oui	Non	Non	Non	Non	Oui	Non	Non	Oui	Non	Non	Non	Non	Oui	Oui	Non	Non	Oui	Non	Non	Non	Régulièrement	plus de 2 ans	MINSANTE	Non	1	1	2	Non	Oui	Non	Non	B	C	Endommagée	Oui	moyenne
328	Mak-Est	Masculin	fonctionnaire	44	Célibataire	Secondaire	Chretien	Oui	Secondaire	Masculin	4	0	Oui	Non	Non	Non	Non	Non	Oui	Non	non	Non	Non	Oui	Oui	Oui	Oui	Non	Non	Non	Oui	Non	Non	Non	RAS	Non	Non	0	3	3	Non	Non	Non	Non	Personne	C	RAS	Non	mauvaises
329	Mak-Est	Masculin	Agriculteur	50	Marié	Secondaire	Chretien	Oui	Secondaire	Masculin	12	0	Oui	Non	Oui	Non	Non	Non	Non	Non	Oui	Non	Non	Non	Non	Oui	Oui	Non	Non	Oui	Non	Non	Non	Régulièrement	plus de 2 ans	MINSANTE	Non	1	4	5	Non	Oui	Non	Non	B	C	Endommagée	Oui	bonne
330	Mak-Est	Féminin	Petits business	42	Célibataire	Primaire	Chretien	Oui	Primaire	Féminin	3	0	Oui	Oui	Oui	Non	Non	Non	Non	Non	Oui	Non	Non	Non	Non	Oui	Oui	Non	Non	Oui	Non	Non	Non	Régulièrement	plus de 2 ans	MINSANTE	Oui	3	3	3	Oui	Non	Non	Non	A	C	Endommagée	Oui	mauvaises
331	Mak-Est	Masculin	Agriculteur	36	Marié	Primaire	Chretien	Non	Secondaire	Féminin	4	1	Oui	Non	Non	Non	Non	Oui	Non	Non	Oui	Non	Non	Non	Non	Oui	Oui	Oui	Non	Oui	Non	Non	Non	Régulièrement	plus de 2 ans	MINSANTE	Non	1	2	2	Non	Oui	Non	Non	B	C	Bon état	Oui	mauvaises
332	Mak-Est	Féminin	Petits business	39	Célibataire	Secondaire	Chretien	Oui	Secondaire	Féminin	6	0	Oui	Oui	Oui	Oui	Oui	Non	Non	Non	Oui	Non	Non	Non	Non	Oui	Oui	Oui	Non	Oui	Non	Non	Non	Régulièrement	plus de 2 ans	MINSANTE	Oui	3	3	3	Oui	Non	Non	Non	A	C	Bon état	Oui	moyenne
333	Mak-Est	Masculin	Agriculteur	37	Célibataire	Secondaire	Chretien	Oui	Secondaire	Masculin	2	0	Oui	Non	Oui	Non	Non	Non	Non	Non	Oui	Non	Non	Non	Non	Oui	Oui	Oui	Non	Non	Oui	Oui	Non	Non	RAS	Non	Non	0	1	1	Non	Non	Non	Non	Personne	C	RAS	Non	mauvaises
334	Mak-Est	Masculin	Petits business	32	Marié	Secondaire	Chretien	Non	Universté	Féminin	3	0	Oui	Oui	Oui	Oui	Oui	Non	Non	Non	Oui	Non	Non	Non	Non	Oui	Non	Oui	Non	Oui	Non	Non	Non	Régulièrement	plus de 2 ans	MINSANTE	Non	2	2	2	Non	Non	Oui	Non	C	B	Endommagée	Oui	mauvaises
335	Mak-Est	Masculin	Agriculteur	66	Célibataire	Secondaire	Chretien	Oui	Secondaire	Masculin	1	0	Oui	Oui	Oui	Non	Non	Non	Non	Non	Oui	Non	Non	Non	Non	Non	Oui	Non	Non	Non	Non	Non	Non	Non	RAS	Non	Non	0	2	2	Non	Non	Non	Non	Personne	C	RAS	Oui	moyenne
149	Cité des merveilles	Masculin	Agriculteur	60	Marié	Secondaire	Chretien	Oui	Secondaire	Masculin	8	0	Oui	Non	Oui	Non	Non	Non	Non	Non	Oui	Oui	Non	Non	Non	Oui	Oui	Non	Non	Oui	Non	Non	Non	Saison pluvieuse	Plus d'1an	MINSANTE	Oui	4	4	4	Oui	Non	Non	Non	A	C	Endommagée	Oui	bonne
150	Cité des merveilles	Masculin	Agriculteur	46	Marié	Secondaire	Chretien	Oui	Secondaire	Masculin	10	0	Oui	Oui	Oui	Oui	Oui	Non	Non	Non	Oui	Non	Non	Non	Non	Oui	Oui	Non	Non	Oui	Non	Non	Oui	Régulièrement	plus de 2 ans	Achat	Non	2	6	5	Oui	Non	Non	Oui	D	C	Endommagée	Oui	bonne
151	Cité des merveilles	Féminin	fonctionnaire	25	Marié	Université	Chretien	Non	Secondaire	Féminin	4	1	Oui	Non	Oui	Non	Non	Non	Non	Non	Oui	Non	Non	Non	Non	Oui	Oui	Non	Non	Oui	Non	Non	Oui	Saison pluvieuse	Plus d'1an	Achat	Non	1	3	3	Non	Non	Non	Oui	D	C	Bon état	Oui	moyenne
152	Cité des merveilles	Masculin	Petits business	26	Célibataire	Secondaire	Chretien	Oui	Secondaire	Masculin	4	0	Oui	Non	Non	Non	Oui	Non	Non	Non	Oui	Non	Non	Non	Non	Oui	Oui	Oui	Non	Oui	Non	Non	Non	Régulièrement	plus de 2 ans	MINSANTE	Non	1	3	3	Non	Oui	Non	Non	Personne	C	Endommagée	Oui	mauvaises
349	Cité des merveilles	Masculin	Petits business	34	Célibataire	Secondaire	Chretien	Oui	Secondaire	Masculin	1	0	Oui	Non	Oui	Non	Non	Non	Non	Non	Oui	Non	Non	Non	Non	Oui	Oui	Non	Non	Oui	Non	Non	Non	Régulièrement	Plus d'1an	MINSANTE	Non	0	1	2	Non	Non	Non	Non	Personne	C	RAS	Oui	mauvaises
350	Cité des merveilles	Masculin	Agriculteur	38	Célibataire	Secondaire	Chretien	Oui	Secondaire	Masculin	3	1	Oui	Non	Oui	Non	Oui	Non	Non	Non	Oui	Non	Non	Non	Non	Oui	Oui	Non	Non	Oui	Non	Non	Non	Régulièrement	Plus d'1an	MINSANTE	Non	0	2	2	Non	Non	Non	Non	Personne	C	Endommagée	Non	mauvaises
401	Cité des merveilles	Féminin	Petits business	39	Marié	Secondaire	Chretien	Non	Universté	Féminin	3	0	Oui	Non	Oui	Non	Non	Non	Non	Non	Oui	Oui	Non	Non	Non	Oui	Oui	Non	Non	Oui	Non	Oui	Non	Régulièrement	Plus d'1an	MINSANTE	Oui	2	2	2	Oui	Non	Non	Non	B	B	Bon état	Oui	bonne
402	Cité des merveilles	Masculin	Petits business	29	Célibataire	Secondaire	Chretien	Oui	Secondaire	Masculin	2	0	Oui	Non	Non	Non	Oui	Non	Non	Non	Oui	Non	Non	Non	Non	Oui	Oui	Non	Non	Oui	Non	Non	Oui	Régulièrement	Plus d'1an	Achat	Non	1	1	2	Non	Non	Non	Non	Personne	B,C	Bon état	Oui	mauvaises
403	Cité des merveilles	Masculin	Petits business	31	Célibataire	Secondaire	Chretien	Oui	Secondaire	Masculin	3	0	Oui	Oui	Oui	Oui	Oui	Non	Non	Non	Oui	Non	Non	Non	Non	Oui	Oui	Non	Non	Oui	Non	Non	Oui	Régulièrement	Plus de 6 mois	Achat	Oui	2	2	2	Non	Non	Oui	Non	C	C	Endommagée	Oui	mauvaises
404	Cité des merveilles	Féminin	Petits business	51	Marié	Secondaire	Chretien	Non	Secondaire	Féminin	8	0	Oui	Non	Non	Non	Oui	Oui	Oui	Non	Oui	Non	Non	Non	Non	Oui	Oui	Non	Non	Oui	Non	Non	Oui	Saison sèche	plus de 2 ans	MINSANTE	Oui	4	3	4	Oui	Non	Non	Non	A	B	Bon état	Oui	mauvaises
391	Ngokop	Féminin	Petits business	36	Célibataire	Primaire	Chretien	Oui	Primaire	Féminin	4	1	Oui	Oui	Oui	Non	Non	Oui	Non	Non	Oui	Non	Non	Non	Non	Oui	Oui	Non	Non	Oui	Non	Non	Non	Régulièrement	plus de 2 ans	MINSANTE	Oui	3	2	3	Oui	Non	Non	Non	A	C	Endommagée	Oui	moyenne
392	Ngokop	Féminin	Ménagère	41	Célibataire	Secondaire	Chretien	Oui	Secondaire	Féminin	5	0	Oui	Non	Oui	Oui	Oui	Non	Non	Non	Oui	Non	Non	Non	Non	Oui	Non	Oui	Non	Oui	Non	Non	Non	Régulièrement	plus de 2 ans	Achat	Non	3	3	4	Non	Non	Oui	Non	C	C	Endommagée	Oui	mauvaises
393	Ngokop	Masculin	Petits business	34	Marié	Secondaire	Chretien	Oui	Secondaire	Masculin	6	1	Oui	Non	Oui	Non	Non	Oui	Non	Non	Oui	Oui	Non	Non	Non	Oui	Non	Oui	Non	Oui	Non	Non	Non	Régulièrement	plus de 2 ans	MINSANTE	Oui	2	2	2	Oui	Non	Non	Non	A	C	Endommagée	Oui	moyenne
394	Ngokop	Masculin	student	28	Célibataire	Université	Chretien	Oui	Universté	Masculin	1	0	Oui	Non	Non	Non	Oui	Non	Non	Non	Oui	Non	Non	Non	Non	Oui	Oui	Non	Non	Oui	Non	Non	Non	Régulièrement	Moins de 6 mois	MINSANTE	Oui	1	1	1	Oui	Non	Non	Non	A	C	Endommagée	Oui	moyenne
395	Ngokop	Masculin	Agriculteur	57	Marié	Secondaire	Chretien	Non	Secondaire	Masculin	7	1	Oui	Non	Non	Non	Oui	Non	Non	Non	Oui	Non	Non	Non	Non	Oui	Non	Oui	Non	Oui	Non	Non	Non	Saison pluvieuse	plus de 2 ans	Don autre MINSANTE	Oui	6	4	6	Oui	Non	Non	Non	A	C	Bon état	Oui	moyenne
396	Ngokop	Féminin	fonctionnaire	28	Célibataire	Secondaire	Chretien	Oui	Secondaire	Féminin	2	1	Oui	Oui	Oui	Oui	Oui	Oui	Non	Non	Oui	Non	Non	Non	Non	Non	Oui	Non	Non	Oui	Non	Non	Non	Régulièrement	plus de 2 ans	MINSANTE	Non	1	2	2	Non	Oui	Non	Oui	B,D	C	Endommagée	Oui	moyenne
397	Ngokop	Féminin	Petits business	52	Marié	Primaire	Chretien	Non	Secondaire	Féminin	5	0	Oui	Non	Non	Non	Oui	Non	Non	Non	Oui	Non	Oui	Non	Non	Oui	Oui	Non	Non	Oui	Non	Oui	Non	Saison pluvieuse	Plus d'1an	MINSANTE	Non	1	3	3	Non	Non	Non	Oui	D	C	Endommagée	Oui	moyenne
258	Ngokop	Masculin	Agriculteur	49	Marié	Université	Chretien	Non	Secondaire	Masculin	6	1	Oui	Non	Non	Non	Oui	Non	Non	Non	Oui	Non	Non	Non	Non	Oui	Oui	Non	Non	Oui	Non	Non	Non	Saison pluvieuse	Moins de 6 mois	MINSANTE	Oui	3	3	3	Oui	Non	Non	Non	A	B,C	Bon état	Oui	moyenne
259	Ngokop	Masculin	fonctionnaire	40	Célibataire	Secondaire	Chretien	Oui	Secondaire	Masculin	4	2	Oui	Non	Oui	Non	Non	Non	Non	Non	Oui	Non	Non	Non	Non	Oui	Oui	Non	Non	Oui	Non	Non	Non	Régulièrement	Plus de 6 mois	MINSANTE	Oui	2	2	2	Oui	Non	Non	Non	A	C	Bon état	Oui	mauvaises
260	Ngokop	Féminin	Ménagère	35	Célibataire	Secondaire	Chretien	Non	Secondaire	Féminin	3	0	Oui	Oui	Oui	Non	Non	Non	Non	Non	Oui	Non	Non	Non	Non	Oui	Oui	Oui	Non	Oui	Non	Non	Non	Régulièrement	plus de 2 ans	Achat	Non	1	2	2	Non	Oui	Non	Non	B	C	Endommagée	Oui	moyenne
261	Ngokop	Masculin	Petits business	32	Marié	Secondaire	Chretien	Oui	Secondaire	Masculin	2	0	Oui	Non	Non	Non	Oui	Non	Non	Non	Oui	Non	Non	Non	Non	Oui	Oui	Non	Non	Oui	Non	Non	Non	Régulièrement	plus de 2 ans	MINSANTE	Oui	2	2	2	Oui	Non	Non	Non	A	C	Endommagée	Oui	mauvaises
262	Ngokop	Masculin	Agriculteur	37	Marié	Université	Chretien	Oui	Universté	Masculin	3	1	Oui	Non	Non	Non	Non	Oui	Non	Non	Oui	Non	Non	Non	Non	Oui	Oui	Oui	Non	Oui	Non	Non	Non	Régulièrement	plus de 2 ans	MINSANTE	Oui	3	3	3	Oui	Non	Non	Non	A	C	Endommagée	Oui	mauvaises
263	Ngokop	Masculin	Petits business	34	Marié	Secondaire	Chretien	Non	Secondaire	Féminin	5	2	Oui	Non	Non	Non	Oui	Non	Non	Non	Oui	Non	Non	Non	Non	Oui	Oui	Non	Non	Oui	Non	Non	Non	Régulièrement	plus de 2 ans	MINSANTE	Non	2	4	4	Non	Oui	Non	Non	B,D	C	Endommagée	Oui	mauvaises
264	Ngokop	Masculin	Agriculteur	49	Marié	Secondaire	Chretien	Non	Secondaire	Féminin	7	2	Oui	Non	Non	Non	Non	Oui	Non	Non	Oui	Non	Non	Non	Non	Oui	Oui	Oui	Non	Oui	Non	Non	Non	Régulièrement	plus de 2 ans	MINSANTE	Oui	5	4	5	Oui	Non	Non	Non	A	C	Endommagée	Oui	mauvaises
301	Ndobolo	Masculin	Agriculteur	56	Marié	Primaire	Chretien	Oui	Primaire	Masculin	4	1	Oui	Non	Non	Oui	Non	Non	Non	Non	Oui	Non	Non	Non	Non	Oui	Oui	Non	Non	Oui	Oui	Non	Non	Régulièrement	plus de 2 ans	MINSANTE	Oui	3	4	4	Non	Non	Oui	Non	C	C	Endommagée	Oui	mauvaises
302	Ndobolo	Masculin	Ménagère	46	Célibataire	Primaire	Chretien	Non	Primaire	Féminin	3	0	Oui	Non	Oui	Non	Non	Non	Non	Non	Oui	Non	Non	Non	Non	Oui	Oui	Non	Non	Oui	Non	Non	Oui	Régulièrement	Plus de 6 mois	MINSANTE	Oui	2	3	3	Non	Non	Oui	Non	C	C	Endommagée	Oui	mauvaises
303	Ndobolo	Masculin	Petits business	32	Célibataire	Secondaire	Chretien	Oui	Secondaire	Masculin	4	1	Oui	Non	Non	Non	Oui	Non	Non	Non	Oui	Non	Non	Non	Non	Oui	Oui	Oui	Non	Oui	Non	Non	Oui	Saison pluvieuse	Plus d'1an	Achat	Non	2	3	3	Non	Oui	Oui	Non	C	A	Endommagée	Oui	mauvaises
304	Ndobolo	Masculin	fonctionnaire	60	Marié	Université	Chretien	Non	Universté	Féminin	5	1	Oui	Non	Oui	Non	Non	Non	Non	Non	Oui	Non	Non	Non	Non	Oui	Oui	Non	Non	Oui	Non	Non	Non	Régulièrement	plus de 2 ans	MINSANTE	Oui	4	3	4	Oui	Non	Non	Non	A	A,C	Bon état	Oui	moyenne
409	Ndobolo	Masculin	Petits business	55	Marié	Secondaire	Chretien	Non	Universté	Masculin	6	0	Oui	Non	Oui	Oui	Oui	Oui	Non	Non	Oui	Non	Non	Non	Non	Oui	Oui	Oui	Non	Oui	Non	Non	Non	Régulièrement	Plus d'1an	MINSANTE	Non	3	3	5	Oui	Non	Non	Non	B	B	Bon état	Oui	mauvaises
367	Kinding-Ndjabi	Masculin	Agriculteur	45	Célibataire	Primaire		Oui	Primaire	Masculin	6	0	Oui	Non	Non	Non	Non	Non	Oui	Non	Oui	Non	Non	Non	Non	Oui	Oui	Non	Non	Non	Non	Non	Non	Non	RAS	Non	Non	0	3	4	Non	Non	Non	Non	Personne	Ras	RAS	Oui	bonne
368	Kinding-Ndjabi	Masculin	Agriculteur	42	Marié	Secondaire	Chretien	Oui	Secondaire	Masculin	8	2	Oui	Non	Non	Non	Oui	Non	Non	Non	Oui	Non	Non	Non	Non	Oui	Oui	Non	Non	Oui	Non	Non	Non	Régulièrement	plus de 2 ans	Achat	Non	2	3	5	Non	Oui	Non	Non	B	B	Endommagée	Oui	bonne
369	Kinding-Ndjabi	Féminin	Petits business	28	Célibataire	Secondaire	Chretien	Oui	Secondaire	Féminin	1	0	Oui	Non	Non	Non	Oui	Non	Non	Non	Oui	Non	Non	Non	Non	Oui	Oui	Non	Non	Non	Oui	Non	Non	Non	RAS	Non	Non	0	2	2	Non	Non	Non	Non	Personne	C	RAS	Oui	mauvaises
370	Kinding-Ndjabi	Masculin	Petits business	47	Marié	Secondaire	Chretien	Oui	Secondaire	Masculin	3	0	Oui	Non	Non	Non	Oui	Non	Non	Non	Oui	Non	Non	Non	Non	Oui	Oui	Non	Non	Oui	Non	Non	Non	Régulièrement	Plus d'1an	MINSANTE	Non	1	3	3	Non	Non	Non	Non	E	C	Endommagée	Oui	bonne
371	Kinding-Ndjabi	Masculin	Agriculteur	36	Marié	Secondaire	Chretien	Oui	Secondaire	Masculin	4	1	Oui	Non	Oui	Non	Non	Non	Non	Non	Oui	Non	Non	Non	Non	Oui	Oui	Non	Non	Oui	Non	Non	Non	Régulièrement	plus de 2 ans	MINSANTE	Oui	2	2	2	Oui	Non	Non	Non	A	C	Endommagée	Oui	bonne
372	Kinding-Ndjabi	Masculin	Agriculteur	40	Marié	Secondaire	Chretien	Oui	Secondaire	Masculin	7	2	Oui	Non	Non	Oui	Non	Non	Non	Non	Oui	Non	Non	Non	Non	Oui	Oui	Non	Non	Oui	Non	Non	Non	Saison pluvieuse	plus de 2 ans	MINSANTE	Non	1	4	4	Non	Non	Non	Oui	D	C	Endommagée	Oui	moyenne
373	Kinding-Ndjabi	Masculin	Petits business	36	Marié	Primaire	Musulman	Oui	Primaire	Masculin	5	3	Oui	Non	Oui	Non	Non	Non	Non	Non	Oui	Non	Non	Non	Non	Oui	Oui	Non	Non	Oui	Non	Oui	Non	Régulièrement	plus de 2 ans	MINSANTE	Non	2	2	3	Non	Non	Non	Non	Personne	B	Endommagée	Oui	moyenne
374	Kinding-Ndjabi	Masculin	Agriculteur	35	Célibataire	Primaire	Chretien	Oui	Primaire	Masculin	3	0	Oui	Non	Non	Non	Non	Non	Oui	Non	Oui	Non	Non	Non	Non	Oui	Oui	Non	Non	Non	Non	Non	Non	Non	RAS	Non	Non	0	2	2	Non	Non	Non	Non	Personne	C	RAS	Oui	mauvaises
375	Kinding-Ndjabi	Masculin	Agriculteur	43	Marié	Secondaire	Chretien	Oui	Secondaire	Masculin	8	1	Oui	Non	Oui	Non	Oui	Non	Non	Non	Oui	Non	Non	Non	Non	Oui	Oui	Non	Non	Oui	Non	Non	Non	Régulièrement	plus de 2 ans	MINSANTE	Oui	3	3	3	Oui	Non	Non	Non	A	C	Endommagée	Oui	mauvaises
376	Kinding-Ndjabi	Féminin	Agriculteur	35	Célibataire	Secondaire	Chretien	Oui	Secondaire	Féminin	3	0	Oui	Oui	Oui	Non	Oui	Non	Non	Non	Oui	Non	Non	Non	Non	Oui	Oui	Non	Non	Oui	Non	Non	Non	Régulièrement	plus de 2 ans	Don autre MINSANTE	Non	1	2	3	Non	Non	Oui	Non	C	C	Endommagée	Oui	moyenne
377	Kinding-Ndjabi	Masculin	Agriculteur	65	Marié	Primaire	Chretien	Oui	Primaire	Masculin	6	0	Oui	Non	Oui	Non	Non	Non	Non	Non	Oui	Non	Non	Non	Non	Oui	Oui	Non	Non	Oui	Non	Non	Non	Régulièrement	Plus de 6 mois	Don autre MINSANTE	Non	2	2	4	Non	Oui	Oui	Non	B,C	A,C	Endommagée	Oui	moyenne
378	Kinding-Ndjabi	Masculin	Agriculteur	44	Marié	Secondaire	Chretien	Oui	Secondaire	Masculin	5	0	Oui	Oui	Oui	Non	Non	Non	Non	Non	Oui	Non	Non	Non	Non	Oui	Oui	Non	Non	Oui	Non	Non	Non	Régulièrement	Plus d'1an	MINSANTE	Non	1	3	4	Non	Oui	Non	Non	B	C	Endommagée	Oui	moyenne
379	Kinding-Ndjabi	Féminin	Petits business	61	Veuve	Primaire	Chretien	Oui	Primaire	Féminin	3	1	Oui	Non	Oui	Non	Oui	Non	Non	Non	Oui	Non	Non	Non	Non	Oui	Oui	Non	Non	Oui	Non	Non	Non	Régulièrement	plus de 2 ans	MINSANTE	Oui	2	2	2	Oui	Non	Non	Non	A	C	Endommagée	Oui	moyenne
380	Kinding-Ndjabi	Masculin	Agriculteur	46	Marié	Primaire	Paien	Oui	Primaire	Masculin	5	0	Oui	Non	Oui	Non	Non	Non	Non	Non	Oui	Non	Non	Non	Non	Oui	Oui	Non	Non	Oui	Non	Non	Non	Régulièrement	Plus d'1an	Achat	Non	2	3	4	Non	Oui	Oui	Non	B,C	C	Endommagée	Oui	mauvaises
381	Kinding-Ndjabi	Féminin	Agriculteur	70	Marié	Primaire	Chretien	Oui	Primaire	Féminin	3	0	Oui	Non	Oui	Non	Non	Non	Non	Non	Oui	Non	Non	Non	Non	Oui	Oui	Non	Non	Oui	Non	Non	Non	Régulièrement	plus de 2 ans	Achat	Oui	2	3	2	Oui	Non	Non	Non	A	C	Endommagée	Oui	mauvaises
382	Kinding-Ndjabi	Masculin	Agriculteur	36	Marié	Primaire	Chretien	Oui	Primaire	Masculin	4	2	Oui	Non	Non	Non	Oui	Non	Non	Non	non	Non	Non	Non	Non	Oui	Oui	Non	Non	Oui	Non	Non	Non	Régulièrement	plus de 2 ans	MINSANTE	Non	2	2	2	Oui	Non	Non	Non	A	C	Endommagée	Oui	mauvaises
383	Kinding-Ndjabi	Féminin	Agriculteur	48	Célibataire	Secondaire	Chretien	Oui	Secondaire	Féminin	4	0	Oui	Non	Non	Non	Oui	Oui	Non	Non	Oui	Non	Non	Non	Non	Oui	Non	Oui	Non	Oui	Non	Non	Non	Régulièrement	plus de 2 ans	MINSANTE	Non	1	3	3	Non	Non	Non	Oui	D	C	Endommagée	Oui	mauvaises
384	Kinding-Ndjabi	Masculin	Petits business	40	Marié	Secondaire	Chretien	Oui	Secondaire	Masculin	6	2	Oui	Non	Oui	Non	Oui	Non	Non	Non	Oui	Oui	Non	Non	Non	Oui	Oui	Non	Non	Oui	Non	Non	Non	Régulièrement	plus de 2 ans	MINSANTE	Non	1	4	4	Non	Non	Non	Oui	D	C	Endommagée	Oui	mauvaises
385	Kinding-Ndjabi	Masculin	Agriculteur	54	Marié	Secondaire	Chretien	Oui	Secondaire	Masculin	8	4	Oui	Non	Non	Non	Oui	Non	Non	Non	Oui	Non	Non	Non	Non	Oui	Oui	Non	Non	Oui	Non	Non	Non	Régulièrement	plus de 2 ans	Achat	Oui	6	4	6	Oui	Non	Non	Non	A	A	Endommagée	Oui	bonne
386	Kinding-Ndjabi	Masculin	Agriculteur	42	Marié	Secondaire	Chretien	Non	Secondaire	Féminin	5	1	Oui	Non	Non	Non	Oui	Non	Non	Non	Oui	Non	Non	Non	Non	Oui	Non	Oui	Non	Oui	Non	Non	Non	Régulièrement	Plus de 6 mois	MINSANTE	Oui	3	2	3	Oui	Non	Non	Non	A	B	Endommagée	Oui	mauvaises
387	Kinding-Ndjabi	Féminin	Agriculteur	33	Marié	Secondaire	Chretien	Oui	Secondaire	Féminin	6	0	Oui	Non	Oui	Non	Non	Non	Non	Non	Oui	Non	Non	Non	Non	Oui	Oui	Non	Non	Oui	Non	Non	Non	Régulièrement	plus de 2 ans	Achat	Non	1	3	3	Non	Oui	Non	Non	B	C	Endommagée	Oui	mauvaises
398	Kassalafam	Féminin	Agriculteur	48	Veuve	Primaire	Chretien	Oui	Primaire	Féminin	6	3	Oui	Non	Non	Non	Oui	Non	Non	Non	Oui	Non	Non	Non	Non	Oui	Oui	Oui	Non	Oui	Non	Non	Non	Saison pluvieuse	plus de 2 ans	MINSANTE	Oui	3	3	3	Oui	Non	Non	Oui	A	A,B	Endommagée	Oui	bonne
399	Kassalafam	Masculin	fonctionnaire	36	Marié	Université	Chretien	Oui	Universté	Masculin	5	0	Oui	Non	Non	Non	Oui	Non	Non	Non	Oui	Non	Non	Non	Non	Oui	Non	Oui	Non	Non	Non	Oui	Non	Non	RAS	Non	Non	0	2	2	Non	Non	Non	Non	Personne	C	RAS	Oui	mauvaises
400	Kassalafam	Masculin	Agriculteur	34	Marié	Secondaire	Chretien	Oui	Secondaire	Masculin	4	1	Oui	Oui	Oui	Oui	Oui	Oui	Non	Non	Oui	Non	Oui	Non	Non	Oui	Oui	Oui	Non	Oui	Non	Oui	Non	Régulièrement	plus de 2 ans	Hopital	Oui	2	2	2	Non	Non	Oui	Oui	C	C	Endommagée	Oui	mauvaises
251	Kassalafam	Masculin	Petits business	36	Marié	Secondaire	Chretien	Oui	Secondaire	Masculin	4	1	Oui	Non	Non	Non	Oui	Non	Non	Non	Oui	Non	Non	Non	Non	Oui	Oui	Non	Non	Oui	Non	Non	Non	Régulièrement	plus de 2 ans	MINSANTE	Non	2	4	4	Non	Oui	Non	Non	B	C	Endommagée	Oui	mauvaises
252	Kassalafam	Masculin	Agriculteur	41	Marié	Primaire	Chretien	Oui	Primaire	Masculin	3	0	Oui	Non	Oui	Non	Non	Oui	Non	Non	non	Non	Oui	Non	Oui	Oui	Oui	Non	Non	Oui	Non	Non	Non	Régulièrement	plus de 2 ans	MINSANTE	Oui	2	3	3	Non	Oui	Oui	Non	B,C	C	Endommagée	Non	mauvaises
253	Kassalafam	Masculin	Agriculteur	62	Marié	Secondaire	Chretien	Oui	Secondaire	Masculin	5	0	Oui	Non	Oui	Non	Non	Oui	Non	Non	non	Non	Non	Non	Non	Oui	Oui	Non	Non	Oui	Non	Non	Non	Saison pluvieuse	plus de 2 ans	Don autre MINSANTE	Non	1	3	3	Non	Non	Oui	Non	C	C	Endommagée	Non	mauvaises
254	Kassalafam	Masculin	Petits business	30	Marié	Primaire	Chretien	Oui	Primaire	Masculin	6	1	Oui	Non	Oui	Non	Non	Non	Non	Non	Oui	Non	Non	Non	Non	Oui	Oui	Oui	Non	Non	Non	Non	Non	Non	RAS	Non	Non	0	4	5	Non	Non	Non	Non	Personne	C	RAS	Oui	mauvaises
255	Kassalafam	Masculin	Petits business	54	Marié	Primaire	Chretien	Oui	Primaire	Masculin	5	2	Oui	Non	Oui	Non	Non	Non	Non	Non	Oui	Non	Non	Non	Non	Oui	Oui	Oui	Non	Non	Non	Non	Non	Non	RAS	Non	Non	0	3	3	Non	Non	Non	Non	Personne	C	RAS	Oui	moyenne
256	Kassalafam	Féminin	Petits business	43	Célibataire	Primaire	Chretien	Oui	Primaire	Féminin	3	0	Oui	Oui	Oui	Oui	Oui	Non	Non	Non	Oui	Non	Non	Non	Non	Oui	Oui	Non	Non	Oui	Oui	Non	Non	Régulièrement	plus de 2 ans	MINSANTE	Non	1	3	3	Non	Non	Oui	Non	C	C	Endommagée	Oui	mauvaises
257	Kassalafam	Masculin	Agriculteur	65	Célibataire	Primaire	Chretien	Oui	Primaire	Masculin	2	0	Oui	Non	Non	Non	Non	Oui	Non	Non	Oui	Non	Non	Non	Non	Oui	Oui	Oui	Non	Oui	Non	Non	Non	Non	plus de 2 ans	Achat	Non	1	2	2	Non	Non	Non	Non	Personne	C	Endommagée	Non	mauvaises
127	Kalakuta	Masculin	Petits business	37	Marié	Secondaire	Chretien	Oui	Secondaire	Masculin	6	1	Oui	Non	Oui	Non	Non	Oui	Non	Non	Oui	Non	Non	Non	Non	Oui	Non	Oui	Non	Oui	Non	Oui	Non	Régulièrement	Plus de 6 mois	MINSANTE	Oui	4	3	4	Oui	Non	Non	Non	A	C	Bon état	Oui	moyenne
128	Kalakuta	Féminin	fonctionnaire	28	Célibataire	Secondaire	Chretien	Oui	Secondaire	Féminin	5	2	Oui	Non	Non	Non	Oui	Oui	Non	Non	Oui	Non	Non	Non	Non	Oui	Oui	Non	Non	Oui	Non	Non	Non	Régulièrement	plus de 2 ans	MINSANTE	Oui	3	3	3	Non	Oui	Oui	Non	B,C	A	Endommagée	Oui	moyenne
129	Kalakuta	Masculin	fonctionnaire	70	Marié	Secondaire	Chretien	Oui	Secondaire	Masculin	2	0	Oui	Non	Non	Non	Oui	Non	Non	Non	Oui	Non	Non	Non	Non	Oui	Oui	Non	Non	Oui	Non	Non	Non	Régulièrement	plus de 2 ans	MINSANTE	Non	1	4	5	Non	Oui	Non	Non	B	C	Endommagée	Oui	moyenne
130	Kalakuta	Masculin	fonctionnaire	36	Célibataire	Université	Chretien	Oui	Universté	Masculin	1	0	Oui	Non	Non	Non	Oui	Non	Non	Non	Oui	Non	Non	Non	Non	Oui	Oui	Oui	Non	Oui	Non	Non	Non	Régulièrement	plus de 2 ans	Achat	Oui	1	1	1	Oui	Non	Non	Non	A	B	Endommagée	Oui	moyenne
131	Kalakuta	Masculin	Agriculteur	52	Marié	Université	Chretien	Non	Secondaire	Masculin	5	1	Oui	Non	Non	Non	Oui	Non	Non	Non	Oui	Non	Non	Non	Non	Oui	Oui	Non	Non	Non	Non	Non	Oui	Régulièrement	plus de 2 ans	MINSANTE	Non	2	4	3	Non	Oui	Non	Non	B	B	Endommagée	Oui	moyenne
132	Kalakuta	Masculin	Petits business	42	Célibataire	Secondaire	Chretien	Oui	Secondaire	Masculin	9	1	Oui	Non	Non	Non	Oui	Non	Non	Non	Oui	Non	Non	Non	Non	Oui	Oui	Non	Non	Oui	Oui	Oui	Non	temps en temps	Plus d'1an	MINSANTE	Non	2	3	3	Non	Oui	Non	Non	B	Ignorance	Endommagée	Oui	bonne
133	Kalakuta	Masculin	Petits business	49	Célibataire	Primaire	Musulman	Oui	Primaire	Masculin	3	0	Oui	Oui	Oui	Non	Non	Oui	Non	Non	non	Non	Non	Non	Oui	Oui	Oui	Non	Non	Oui	Non	Non	Non	Saison pluvieuse	plus de 2 ans	Don autre MINSANTE	Non	2	3	3	Oui	Non	Non	Non	A	C	Bon état	Oui	moyenne
134	Kalakuta	Masculin	Petits business	51	Marié	Primaire	Musulman	Oui	Primaire	Masculin	9	2	Oui	Non	Oui	Non	Non	Non	Non	Non	Oui	Non	Non	Non	Non	Oui	Oui	Non	Non	Non	Non	Non	Oui	Non	RAS	Non	Non	0	5	7	Non	Non	Non	Non	Personne	C	RAS	Non	bonne
135	Kalakuta	Masculin	Petits business	28	Marié	Secondaire	Chretien	Oui	Secondaire	Masculin	3	1	Oui	Non	Non	Non	Non	Oui	Non	Non	Oui	Non	Non	Non	Non	Oui	Oui	Non	Non	Oui	Non	Non	Non	Régulièrement	plus de 2 ans	MINSANTE	Non	1	2	2	Non	Non	Oui	Non	Personne	C	Endommagée	Oui	bonne
136	Kalakuta	Masculin	Petits business	36	Célibataire	Secondaire	Chretien	Oui	Secondaire	Masculin	2	0	Oui	Non	Oui	Oui	Non	Non	Non	Non	Oui	Non	Non	Non	Non	Non	Oui	Non	Non	Non	Non	Non	Non	Non	RAS	Non	Non	0	2	2	Non	Non	Non	Non	Personne	Esthétique	RAS	Oui	mauvaises
222	Kalakuta	Masculin	fonctionnaire	36	Célibataire	Université	Chretien	Oui	Universté	Masculin	3	0	Oui	Non	Non	Non	Oui	Non	Non	Non	Oui	Non	Non	Non	Non	Oui	Non	Oui	Non	Oui	Non	Non	Non	Saison sèche	plus de 2 ans	Achat	Non	1	2	2	Oui	Non	Non	Non	A	C	Endommagée	Oui	bonne
223	Kalakuta	Féminin	Ménagère	62	Marié	Primaire	Chretien	Oui	Primaire	Féminin	3	0	Oui	Non	Oui	Non	Non	Oui	Non	Non	Oui	Non	Non	Non	Non	Oui	Non	Oui	Oui	Oui	Non	Non	Oui	Régulièrement	plus de 2 ans	MINSANTE	Oui	2	2	2	Oui	Non	Non	Non	A	A,C	Endommagée	Oui	mauvaises
224	Kalakuta	Féminin	Ménagère	48	Marié	Secondaire	Chretien	Non	Universté	Féminin	5	0	Oui	Non	Non	Non	Oui	Non	Non	Non	Oui	Non	Non	Non	Non	Oui	Non	Oui	Non	Oui	Oui	Oui	Oui	Régulièrement	plus de 2 ans	Achat	Oui	3	3	3	Non	Non	Oui	Non	C	B	Endommagée	Non	moyenne
225	Kalakuta	Masculin	Agriculteur	45	Marié	Secondaire	Chretien	Non	Secondaire	Féminin	5	2	Oui	Oui	Oui	Oui	Oui	Oui	Non	Non	Oui	Non	Non	Non	Non	Oui	Oui	Non	Non	Oui	Non	Oui	Non	Régulièrement	Plus d'1an	Hopital	Non	1	2	3	Non	Oui	Non	Oui	B,D	C	Bon état	Oui	moyenne
226	Kalakuta	Masculin	Ménagère	41	Célibataire	Secondaire	Paien	Oui	Secondaire	Féminin	2	0	Oui	Non	Oui	Non	Non	Non	Non	Non	Oui	Non	Non	Non	Non	Oui	Oui	Oui	Non	Oui	Non	Non	Non	Régulièrement	plus de 2 ans	MINSANTE	Oui	2	2	2	Oui	Non	Non	Non	A	C	Endommagée	Oui	mauvaises
227	Kalakuta	Féminin	fonctionnaire	31	Célibataire	Secondaire	Chretien	Oui	Secondaire	Féminin	3	0	Oui	Non	Oui	Non	Oui	Non	Non	Non	Oui	Non	Non	Non	Non	Oui	Oui	Oui	Non	Oui	Non	Non	Non	Régulièrement	plus de 2 ans	MINSANTE	Non	1	3	3	Non	Oui	Non	Non	D	C	Endommagée	Oui	bonne
228	Kalakuta	Masculin	Agriculteur	65	Marié	Secondaire	Chretien	Non	Secondaire	Masculin	8	1	Oui	Non	Non	Non	Non	Non	Oui	Non	Oui	Non	Non	Non	Non	Oui	Oui	Oui	Oui	Non	Non	Non	Non	Non	RAS	Non	Non	0	3	3	Non	Non	Non	Non	Personne	C	RAS	Non	moyenne
229	Kalakuta	Masculin	Petits business	45	Marié	Secondaire	Chretien	Oui	Secondaire	Masculin	4	0	Oui	Non	Non	Non	Non	Oui	Non	Non	Oui	Non	Non	Non	Non	Oui	Oui	Non	Non	Oui	Oui	Non	Non	Régulièrement	plus de 2 ans	MINSANTE	Non	1	3	3	Non	Non	Oui	Non	C	C	Endommagée	Oui	moyenne
230	Kalakuta	Féminin	Petits business	33	Célibataire	Secondaire	Chretien	Oui	Secondaire	Féminin	3	0	Oui	Non	Oui	Non	Non	Oui	Non	Non	Oui	Non	Non	Non	Non	Oui	Oui	Non	Non	Oui	Non	Non	Non	Régulièrement	plus de 2 ans	MINSANTE	Oui	2	2	2	Non	Non	Oui	Non	C	C	Endommagée	Oui	bonne
359	Kalakuta	Féminin	Agriculteur	34	Célibataire	Secondaire	Chretien	Oui	Secondaire	Féminin	4	1	Oui	Oui	Oui	Oui	Oui	Non	Non	Non	Oui	Non	Non	Non	Non	Oui	Oui	Non	Non	Oui	Non	Non	Non	Saison pluvieuse	plus de 2 ans	MINSANTE	Oui	2	2	2	Oui	Non	Non	Non	A	A	Endommagée	Oui	bonne
360	Kalakuta	Masculin	Petits business	43	Célibataire	Secondaire	Chretien	Oui	Secondaire	Masculin	5	1	Oui	Oui	Oui	Non	Oui	Non	Non	Non	Oui	Non	Non	Non	Non	Oui	Oui	Non	Non	Oui	Non	Oui	Non	Régulièrement	Moins de 6 mois	MINSANTE	Oui	4	4	4	Non	Non	Oui	Non	B	B	Endommagée	Non	moyenne
361	Kalakuta	Masculin	Petits business	48	Marié	Secondaire	Chretien	Oui	Secondaire	Masculin	3	0	Oui	Oui	Oui	Oui	Oui	Non	Oui	Non	Oui	Non	Non	Non	Non	Oui	Oui	Oui	Non	Oui	Non	Non	Non	Régulièrement	plus de 2 ans	Achat	Oui	2	2	2	Oui	Non	Non	Non	A	C	Bon état	Non	mauvaises
362	Kalakuta	Masculin	fonctionnaire	59	Marié	Secondaire	Chretien	Oui	Secondaire	Masculin	8	0	Oui	Oui	Oui	Oui	Oui	Oui	Oui	Non	Oui	Non	Non	Non	Non	Oui	Oui	Non	Non	Oui	Non	Non	Non	Régulièrement	plus de 2 ans	MINSANTE	Oui	3	3	3	Oui	Non	Non	Non	A	C	Bon état	Oui	bonne
363	Kalakuta	Féminin	fonctionnaire	30	Célibataire	Université	Chretien	Oui	Universté	Féminin	2	0	Oui	Non	Non	Non	Oui	Non	Non	Non	Oui	Oui	Non	Non	Non	Oui	Oui	Non	Non	Oui	Non	Non	Non	Régulièrement	Plus d'1an	MINSANTE	Oui	2	1	2	Oui	Non	Non	Non	A	B	Bon état	Non	bonne
364	Kalakuta	Masculin	Petits business	35	Marié	Secondaire	Chretien	Oui	Secondaire	Masculin	3	1	Oui	Oui	Oui	Non	Non	Non	Non	Non	Oui	Non	Non	Non	Non	Oui	Oui	Non	Non	Oui	Non	Oui	Oui	Régulièrement	plus de 2 ans	MINSANTE	Oui	2	2	2	Oui	Non	Non	Non	A	A,B,C	Bon état	Oui	mauvaises
365	Kalakuta	Masculin	Agriculteur	55	Célibataire	Primaire	Chretien	Non	Secondaire	Féminin	4	0	Oui	Non	Non	Non	Oui	Non	Non	Non	Oui	Non	Non	Non	Non	Oui	Oui	Non	Non	Oui	Non	Oui	Oui	Saison pluvieuse	Plus de 6 mois	MINSANTE	Non	1	2	2	Non	Non	Oui	Non	C	C	Bon état	Oui	mauvaises
366	Kalakuta	Féminin	Petits business	29	Marié	Secondaire	Chretien	Oui	Secondaire	Féminin	2	1	Oui	Non	Oui	Non	Non	Oui	Non	Non	Oui	Oui	Non	Non	Non	Oui	Oui	Oui	Non	Oui	Non	Oui	Non	Régulièrement	Moins de 6 mois	Achat	Oui	1	2	1	Oui	Non	Non	Non	A	B	Bon état	Oui	moyenne
143	Samenfou	Masculin	Agriculteur	29	Célibataire	Secondaire	Chretien	Non	Universté	Féminin	4	2	Oui	Non	Oui	Non	Oui	Non	Non	Non	Oui	Non	Non	Non	Non	Oui	Oui	Oui	Non	Oui	Non	Oui	Oui	Régulièrement	plus de 2 ans	MINSANTE	Oui	1	1	1	Non	Oui	Non	Oui	B,D	A	Endommagée	Oui	moyenne
144	Samenfou	Féminin	Agriculteur	51	Célibataire	Primaire	Chretien	Non	Secondaire	Féminin	4	1	Oui	Non	Oui	Oui	Oui	Non	Non	Non	Oui	Non	Non	Non	Non	Oui	Oui	Non	Non	Oui	Non	Oui	Non	Régulièrement	plus de 2 ans	MINSANTE	Oui	2	2	2	Non	Oui	Oui	Oui	B,C,D	A	Endommagée	Oui	bonne
145	Samenfou	Masculin	fonctionnaire	46	Marié	Secondaire	Chretien	Oui	Secondaire	Masculin	3	0	Oui	Oui	Oui	Oui	Oui	Non	Non	Non	Oui	Non	Non	Non	Non	Oui	Oui	Non	Non	Non	Non	Non	Oui	Régulièrement	Plus de 6 mois	MINSANTE	Oui	3	3	3	Oui	Non	Non	Non	A	C	Endommagée	Oui	moyenne
146	Samenfou	Féminin	Ménagère	50	Marié	Secondaire	Chretien	Oui	Secondaire	Féminin	6	1	Oui	Oui	Non	Non	Oui	Non	Non	Non	Oui	Non	Non	Non	Non	Oui	Oui	Non	Non	Oui	Non	Non	Oui	Régulièrement	plus de 2 ans	Achat	Non	1	3	3	Oui	Non	Non	Non	A	C	Endommagée	Oui	mauvaises
147	Samenfou	Masculin	Agriculteur	48	Marié	Secondaire	Chretien	Non	Secondaire	Masculin	7	0	Oui	Non	Non	Non	Oui	Non	Non	Non	Oui	Non	Non	Non	Non	Oui	Oui	Oui	Non	Oui	Non	Non	Non	Saison pluvieuse	plus de 2 ans	MINSANTE	Non	2	3	4	Non	Oui	Non	Non	B	C	Endommagée	Oui	moyenne
148	Samenfou	Masculin	Agriculteur	59	Marié	Primaire	Chretien	Non	Universté	Féminin	6	3	Oui	Non	Non	Non	Oui	Non	Non	Non	Oui	Non	Non	Non	Non	Oui	Non	Oui	Non	Oui	Non	Non	Non	Saison pluvieuse	Plus d'1an	MINSANTE	Non	2	4	2	Non	Non	Non	Oui	C	C	Bon état	Oui	mauvaises
405	Samenfou	Masculin	Petits business	33	Célibataire	Secondaire	Chretien	Oui	Secondaire	Masculin	1	0	Oui	Non	Oui	Non	Non	Non	Non	Non	Oui	Non	Non	Non	Non	Oui	Oui	Non	Non	Oui	Oui	Non	Non	Régulièrement	plus de 2 ans	MINSANTE	Non	1	2	2	Non	Oui	Non	Non	B	B	Endommagée	Oui	mauvaises
406	Samenfou	Féminin	Petits business	35	Marié	Secondaire	Chretien	Non	Secondaire	Féminin	4	1	Oui	Non	Oui	Oui	Oui	Non	Non	Non	Oui	Non	Non	Non	Non	Oui	Oui	Oui	Non	Oui	Non	Non	Non	Régulièrement	plus de 2 ans	MINSANTE	Non	2	3	3	Non	Oui	Non	Non	B	C	Endommagée	Oui	moyenne
407	Samenfou	Masculin	Petits business	38	Célibataire	Université	Chretien	Oui	Universté	Masculin	5	2	Oui	Non	Non	Non	Oui	Non	Non	Non	Oui	Oui	Non	Non	Non	Oui	Oui	Non	Oui	Oui	Non	Oui	Non	Régulièrement	Plus d'1an	MINSANTE	Oui	2	2	2	Oui	Non	Non	Non	A	C	Bon état	Oui	bonne
408	Samenfou	Féminin	fonctionnaire	34	Marié	Secondaire	Chretien	Oui	Secondaire	Féminin	2	0	Oui	Non	Oui	Non	Non	Oui	Non	Non	Oui	Non	Non	Non	Non	Oui	Oui	Non	Non	Oui	Non	Non	Oui	Régulièrement	Plus d'1an	MINSANTE	Oui	2	3	2	Oui	Non	Non	Non	A	B	Endommagée	Oui	moyenne
317	Mock-Sud	Masculin	Agriculteur	63	Marié	Primaire	Chretien	Non	Universté	Masculin	8	1	Oui	Oui	Oui	Oui	Oui	Non	Non	Non	Oui	Oui	Non	Non	Non	Oui	Oui	Non	Non	Oui	Non	Non	Non	Saison pluvieuse	Plus de 6 mois	MINSANTE	Non	2	3	3	Non	Oui	Oui	Non	B,D	C	Endommagée	Non	bonne
318	Mock-Sud	Masculin	Agriculteur	57	Marié	Secondaire	Chretien	Oui	Secondaire	Masculin	9	3	Oui	Non	Non	Non	Oui	Non	Non	Non	Oui	Non	Non	Non	Non	Oui	Non	Oui	Non	Oui	Non	Non	Non	Régulièrement	plus de 2 ans	MINSANTE	Oui	4	4	4	Oui	Non	Non	Non	A	B	Bon état	Oui	bonne
319	Mock-Sud	Masculin	fonctionnaire	62	Marié	Université	Chretien	Non	Secondaire	Masculin	3	0	Oui	Non	Non	Non	Oui	Non	Non	Non	Oui	Non	Non	Non	Non	Oui	Oui	Non	Non	Oui	Non	Oui	Non	Saison pluvieuse	Plus d'1an	MINSANTE	Oui	2	2	2	Oui	Non	Non	Non	A	B	Endommagée	Oui	mauvaises
320	Mock-Sud	Féminin	Ménagère		Marié	Primaire	Chretien	Non	Secondaire	Féminin	11	1	Oui	Non	Non	Non	Oui	Non	Non	Non	Oui	Non	Non	Non	Non	Oui	Oui	Non	Non	Oui	Non	Oui	Oui	Régulièrement	Plus de 6 mois	MINSANTE	Non	2	4	7	Non	Non	Non	Oui	D	Insuffisant	Endommagée	Oui	moyenne
321	Mock-Sud	Féminin	Petits business	35	Marié	Secondaire	Chretien	Oui	Secondaire	Féminin	2	0	Oui	Non	Non	Oui	Non	Non	Non	Non	Oui	Non	Non	Non	Non	Oui	Oui	Non	Non	Oui	Non	Non	Non	Régulièrement	Plus d'1an	MINSANTE	Non	1	2	2	Non	Non	Oui	Non	C	B	Endommagée	Oui	moyenne
322	Mock-Sud	Masculin	Agriculteur	51	Marié	Secondaire	Chretien	Non	Secondaire	Masculin	7	0	Oui	Non	Non	Oui	Oui	Non	Non	Non	Oui	Non	Non	Non	Non	Oui	Oui	Non	Non	Oui	Non	Non	Non	Régulièrement	plus de 2 ans	MINSANTE	Non	2	3	3	Non	Oui	Non	Non	C	B	Endommagée	Oui	mauvaises
323	Mock-Sud	Féminin	Ménagère	26	Célibataire	Secondaire	Chretien	Oui	Secondaire	Féminin	4	0	Oui	Non	Non	Non	Oui	Non	Non	Non	Oui	Non	Non	Non	Non	Oui	Oui	Non	Non	Oui	Non	Non	Non	Régulièrement	plus de 2 ans	MINSANTE	Oui	2	2	2	Oui	Non	Non	Non	A	B	Endommagée	Oui	bonne
324	Mock-Sud	Masculin	Petits business	37	Marié	Secondaire	Chretien	Oui	Secondaire	Masculin	6	2	Oui	Non	Non	Non	Oui	Non	Non	Non	Oui	Oui	Non	Non	Non	Oui	Oui	Non	Non	Oui	Oui	Non	Non	Régulièrement	plus de 2 ans	MINSANTE	Non	3	3	3	Oui	Non	Non	Non	D	C	Endommagée	Oui	moyenne
199	Mock-Sud	Masculin	Agriculteur	48	Célibataire	Secondaire	Chretien	Non	Secondaire	Masculin	4	2	Oui	Non	Non	Non	Oui	Non	Non	Non	Oui	Non	Non	Non	Non	Oui	Oui	Non	Non	Oui	Non	Oui	Non	Saison sèche	Moins de 6 mois	MINSANTE	Oui	3	3	3	Oui	Non	Non	Non	A	C	Bon état	Oui	mauvaises
200	Mock-Sud	Masculin	Agriculteur	53	Marié	Primaire	Chretien	Oui	Primaire	Masculin	2	0	Oui	Non	Non	Non	Oui	Non	Non	Non	Oui	Non	Non	Non	Non	Oui	Oui	Non	Non	Oui	Non	Non	Non	Régulièrement	Plus d'1an	Don autre MINSANTE	Non	1	2	1	Oui	Non	Non	Non	A	C	Endommagée	Oui	mauvaises
201	Mock-Sud	Masculin	fonctionnaire	42	Marié	Université	Chretien	Oui	Universté	Masculin	5	0	Oui	Non	Oui	Oui	Non	Non	Non	Non	Oui	Oui	Non	Non	Non	Oui	Oui	Non	Non	Oui	Non	Non	Oui	Régulièrement	Moins de 6 mois	MINSANTE	Non	2	4	4	Non	Non	Oui	Non	C	A,C	Bon état	Oui	mauvaises
202	Mock-Sud	Masculin	fonctionnaire	56	Marié	Université	Chretien	Non	Secondaire	Masculin	9	2	Oui	Non	Oui	Non	Non	Non	Non	Non	Oui	Oui	Non	Non	Non	Oui	Oui	Non	Non	Oui	Non	Non	Non	Régulièrement	plus de 2 ans	MINSANTE	Oui	5	3	5	Oui	Non	Non	Non	A	C	Endommagée	Oui	moyenne
203	Mock-Sud	Féminin	Ménagère	68	Célibataire	Primaire	Chretien	Non	Secondaire	Féminin	8	1	Oui	Non	Oui	Oui	Oui	Non	Non	Non	Oui	Oui	Non	Non	Non	Oui	Oui	Non	Non	Oui	Non	Non	Non	Régulièrement	plus de 2 ans	MINSANTE	Oui	3	2	3	Oui	Non	Non	Non	A	B	Endommagée	Oui	mauvaises
204	Mock-Sud	Féminin	Petits business	37	Célibataire	Secondaire	Chretien	Oui	Secondaire	Féminin	4	1	Oui	Non	Non	Non	Non	Oui	Non	Non	Oui	Non	Oui	Non	Non	Oui	Oui	Oui	Non	Non	Non	Oui	Oui	Non	RAS	Non	Non	0	3	3	Non	Non	Non	Non	Personne	B,C	RAS	Oui	bonne
205	Mock-Sud	Masculin	fonctionnaire		Marié	Secondaire	Chretien	Non	Secondaire	Féminin	3	0	Oui	Oui	Non	Non	Oui	Non	Non	Non	Oui	Non	Non	Non	Non	Oui	Oui	Non	Non	Oui	Non	Non	Non	Saison pluvieuse	plus de 2 ans	Hopital	Non	2	3	3	Non	Non	Oui	Non	C	B	Bon état	Oui	moyenne
206	Mock-Sud	Féminin	fonctionnaire	29	Célibataire	Secondaire	Chretien	Oui	Secondaire	Féminin	5	2	Oui	Non	Non	Non	Oui	Non	Non	Non	Oui	Non	Non	Non	Non	Oui	Oui	Non	Oui	Oui	Non	Non	Oui	Saison pluvieuse	Moins de 6 mois	Don autre MINSANTE	Non	1	4	4	Non	Non	Oui	Non	Personne	C	Endommagée	Oui	mauvaises
207	Mock-Sud	Féminin	Ménagère		Célibataire	Secondaire	Chretien	Non	Secondaire	Féminin	6	1	Oui	Non	Oui	Oui	Oui	Non	Non	Non	Oui	Non	Non	Non	Non	Non	Oui	Non	Non	Oui	Non	Non	Non	Régulièrement	Moins de 6 mois	MINSANTE	Oui	3	3	3	Oui	Non	Non	Non	A	C	Bon état	Oui	moyenne
208	Mock-Sud	Féminin	Petits business	28	Célibataire	Secondaire	Chretien	Oui	Secondaire	Féminin	4	1	Oui	Non	Oui	Non	Oui	Non	Non	Non	Oui	Non	Non	Non	Non	Non	Oui	Non	Non	Oui	Non	Non	Oui	Régulièrement	plus de 2 ans	Don autre MINSANTE	Oui	4	3	4	Non	Oui	Oui	Non	C,D	C	Bon état	Oui	mauvaises
209	Mock-Sud	Masculin	fonctionnaire	52	Marié	Université	Chretien	Oui	Universté	Masculin	11	2	Oui	Non	Oui	Non	Oui	Non	Non	Non	Oui	Non	Non	Non	Non	Oui	Oui	Non	Non	Oui	Oui	Oui	Non	Rarement	plus de 2 ans	MINSANTE	Non	3	5	5	Non	Oui	Non	Oui	B,D	C	Endommagée	Oui	bonne
410	Mock-Sud	Masculin	Petits business	42	Marié	Secondaire	Chretien	Non	Secondaire	Masculin	4	0	Oui	Non	Non	Non	Oui	Non	Non	Non	Oui	Non	Non	Non	Non	Oui	Non	Oui	Non	Oui	Non	Non	Non	Régulièrement	Plus de 6 mois	MINSANTE	Non	3	5	5	Oui	Non	Non	Non	A	B	Bon état	Oui	bonne
411	Mock-Sud	Masculin	Petits business	64	Marié	Secondaire	Chretien	Oui	Secondaire	Masculin	3	0	Oui	Non	Non	Non	Oui	Non	Non	Non	Oui	Non	Non	Non	Non	Oui	Oui	Non	Non	Oui	Non	Oui	Oui	Régulièrement	Plus d'1an	MINSANTE	Non	1	3	3	Non	Non	Non	Non	E	C	Endommagée	Oui	mauvaises
412	Mock-Sud	Masculin	Petits business	34	Marié	Primaire	Chretien	Non	Secondaire	Masculin	4	0	Oui	Non	Oui	Non	Non	Non	Non	Non	Oui	Non	Non	Non	Non	Oui	Oui	Non	Non	Oui	Non	Non	Non	Régulièrement	plus de 2 ans	MINSANTE	Non	1	3	3	Non	Oui	Non	Non	B	C	Bon état	Oui	mauvaises
413	Mock-Sud	Masculin	fonctionnaire	55	Marié	Secondaire	Chretien	Oui	Secondaire	Masculin	5	0	Oui	Non	Non	Non	Oui	Non	Non	Non	Oui	Non	Non	Non	Non	Oui	Non	Oui	Non	Oui	Non	Non	Non	Saison sèche	plus de 2 ans	MINSANTE	Non	1	2	2	Oui	Non	Non	Non	A	C	Endommagée	Oui	bonne
[truncated: 26 more columns]

## Sheet: Connaissance paludisme
Sexe du CM	Proféssion du CM	Niveau d'étude CM	Réligion du CM	Niveau d'étude Rpd	Connaissance palu	Moustique vecteur	connaissance symptomes	connaissance sur le paludisme
Féminin	Petits business	Secondaire	Chretien	Secondaire	Oui	Oui	mauvaises	Mauvaises connaissances
Masculin	Agriculteur	Secondaire	Musulman	Secondaire	Oui	Oui	bonne	Bonne connaisances
Masculin	Petits business	Primaire	Chretien	Sans niveau	Oui	non	mauvaises	Mauvaises connaissances
Féminin	Petits business	Secondaire	Chretien	Secondaire	Oui	Oui	mauvaises	Mauvaises connaissances
Masculin	fonctionnaire	Secondaire	Chretien	Secondaire	Oui	Oui	moyenne	Connaissances moyennes
Masculin	Agriculteur	Université	Chretien	Universté	Oui	Oui	bonne	Bonne connaisances
Féminin	Ménagère	Secondaire	Chretien	Secondaire	Oui	non	moyenne	Mauvaises connaissances
Masculin	Agriculteur	Secondaire	Chretien	Secondaire	Oui	Oui	bonne	Bonne connaisances
Féminin	Ménagère	Primaire	Chretien	Secondaire	Oui	Oui	moyenne	Connaissances moyennes
Masculin	Agriculteur	Primaire	Chretien	Secondaire	Oui	Oui	moyenne	Connaissances moyennes
Masculin	Agriculteur	Université	Chretien	Universté	Oui	Oui	moyenne	Connaissances moyennes
Masculin	Agriculteur	Secondaire	Chretien	Secondaire	Oui	Oui	bonne	Bonne connaisances
Féminin	Ménagère	Secondaire	Chretien	Secondaire	Oui	Oui	mauvaises	Mauvaises connaissances
Féminin	Ménagère	Secondaire	Chretien	Primaire	Oui	non	moyenne	Mauvaises connaissances
Féminin	Petits business	Secondaire	Chretien	Secondaire	Oui	Oui	moyenne	Connaissances moyennes
Féminin	Petits business	Université	Chretien	Universté	Oui	Oui	moyenne	Connaissances moyennes
Masculin	Agriculteur	Secondaire	Paien	Secondaire	Oui	Oui	moyenne	Connaissances moyennes
Masculin	Petits business	Secondaire	Chretien	Secondaire	Oui	Oui	moyenne	Connaissances moyennes
Masculin	Petits business	Secondaire	Chretien	Secondaire	Oui	Oui	bonne	Bonne connaisances
Masculin	student	Secondaire	Chretien	Secondaire	Oui	Oui	moyenne	Connaissances moyennes
Masculin	Agriculteur	Primaire	Chretien	Primaire	Oui	Oui	moyenne	Connaissances moyennes
Féminin	Ménagère	Secondaire	Chretien	Secondaire	Oui	Oui	mauvaises	Mauvaises connaissances
Masculin	Agriculteur	Université	Chretien	Secondaire	Oui	Oui	moyenne	Connaissances moyennes
Masculin	Agriculteur	Secondaire	Chretien	Secondaire	Oui	Oui	moyenne	Connaissances moyennes
Féminin	Ménagère	Primaire	Chretien	Secondaire	Oui	Oui	moyenne	Connaissances moyennes
Féminin	Ménagère	Secondaire	Chretien	Secondaire	Oui	Oui	mauvaises	Mauvaises connaissances
Féminin	fonctionnaire	Université	Chretien	Secondaire	Oui	Oui	bonne	Bonne connaisances
Masculin	Agriculteur	Secondaire	Chretien	Secondaire	Oui	Oui	mauvaises	Mauvaises connaissances
Masculin	Agriculteur	Secondaire	Chretien	Secondaire	Oui	Oui	mauvaises	Mauvaises connaissances
Féminin	Petits business	Secondaire	Chretien	Secondaire	Oui	Oui	mauvaises	Mauvaises connaissances
Masculin	Agriculteur	Secondaire	Chretien	Secondaire	Oui	Oui	bonne	Bonne connaisances
Masculin	Agriculteur	Secondaire	Chretien	Secondaire	Oui	Oui	moyenne	Connaissances moyennes
Masculin	student	Secondaire	Chretien	Secondaire	Oui	Oui	bonne	Bonne connaisances
Masculin	Agriculteur	Secondaire	Chretien	Secondaire	Oui	Oui	moyenne	Connaissances moyennes
Masculin	Agriculteur	Primaire	Chretien	Secondaire	Oui	Oui	bonne	Bonne connaisances
Féminin	Agriculteur	Sans niveau	Paien	Sans niveau	Oui	Oui	mauvaises	Mauvaises connaissances
Masculin	Petits business	Secondaire	Chretien	Secondaire	Oui	Oui	bonne	Bonne connaisances
Masculin	Petits business	Primaire	Paien	Primaire	Oui	Oui	moyenne	Connaissances moyennes
Masculin	Agriculteur	Primaire	Chretien	Primaire	Oui	Oui	moyenne	Connaissances moyennes
Masculin	Petits business	Primaire	Musulman	Secondaire	Oui	Oui	moyenne	Connaissances moyennes
Masculin	fonctionnaire	Université	Chretien	Universté	Oui	Oui	moyenne	Connaissances moyennes
Masculin	Petits business	Secondaire	Chretien	Secondaire	Oui	Oui	moyenne	Connaissances moyennes
Masculin	fonctionnaire	Primaire	Chretien	Secondaire	Oui	Oui	mauvaises	Mauvaises connaissances
Masculin	Petits business	Secondaire	Chretien	Secondaire	Oui	Oui	bonne	Bonne connaisances
Masculin	Petits business	Primaire	Paien	Primaire	Oui	Oui	mauvaises	Mauvaises connaissances
Masculin	Petits business	Secondaire	Chretien	Secondaire	Oui	Oui	mauvaises	Mauvaises connaissances
Masculin	Petits business	Secondaire	Chretien	Secondaire	Oui	Oui	moyenne	Connaissances moyennes
Masculin	Agriculteur	Primaire	Chretien	Universté	Oui	Oui	mauvaises	Mauvaises connaissances
Masculin	Agriculteur	Secondaire	Chretien	Secondaire	Oui	Oui	moyenne	Connaissances moyennes
Masculin	Petits business	Secondaire	Chretien	Universté	Oui	Oui	moyenne	Connaissances moyennes
Masculin	student	Secondaire	Chretien	Secondaire	Oui	Oui	moyenne	Connaissances moyennes
Masculin	Petits business	Secondaire	Chretien	Secondaire	Oui	Oui	moyenne	Connaissances moyennes
Féminin	fonctionnaire	Université	Chretien	Universté	Oui	Oui	bonne	Bonne connaisances
Masculin	Agriculteur	Primaire	Chretien	Secondaire	Oui	Oui	mauvaises	Mauvaises connaissances
Féminin	Agriculteur	Secondaire	Chretien	Universté	Oui	Oui	mauvaises	Mauvaises connaissances
Masculin	Agriculteur	Primaire	Chretien	Secondaire	Oui	Oui	moyenne	Connaissances moyennes
Masculin	Agriculteur	Secondaire	Chretien	Secondaire	Oui	Oui	bonne	Bonne connaisances
Féminin	Petits business	Secondaire	Chretien	Secondaire	Oui	Oui	moyenne	Connaissances moyennes
Masculin	Agriculteur	Secondaire	Chretien	Secondaire	Oui	Oui	mauvaises	Mauvaises connaissances
Masculin	Agriculteur	Université	Chretien	Secondaire	Oui	Oui	mauvaises	Mauvaises connaissances
Féminin	Petits business	Primaire	Musulman	Secondaire	Oui	Oui	moyenne	Connaissances moyennes
Féminin	Petits business	Secondaire	Chretien	Secondaire	Oui	Oui	moyenne	Connaissances moyennes
Féminin	Petits business	Secondaire	Chretien	Secondaire	Oui	Oui	moyenne	Connaissances moyennes
Féminin	Petits business	Primaire	Chretien	Primaire	Oui	Oui	mauvaises	Mauvaises connaissances
Masculin	Agriculteur	Secondaire	Chretien	Secondaire	Oui	Oui	moyenne	Connaissances moyennes
Féminin	Petits business	Université	Chretien	Universté	Oui	Oui	moyenne	Connaissances moyennes
Masculin	fonctionnaire	Université	Chretien	Universté	Oui	Oui	bonne	Bonne connaisances
Masculin	fonctionnaire	Primaire	Chretien	Primaire	Oui	Oui	moyenne	Connaissances moyennes
Masculin	fonctionnaire	Université	Chretien	Universté	Oui	Oui	moyenne	Connaissances moyennes
Masculin	Petits business	Secondaire	Chretien	Secondaire	Oui	Oui	mauvaises	Mauvaises connaissances
Masculin	Petits business	Secondaire	Chretien	Secondaire	Oui	Oui	mauvaises	Mauvaises connaissances
Masculin	Agriculteur	Secondaire	Musulman	Secondaire	Oui	Oui	bonne	Bonne connaisances
Masculin	Petits business	Secondaire	Chretien	Secondaire	Oui	Oui	mauvaises	Mauvaises connaissances
Masculin	Petits business	Primaire	Chretien	Primaire	Oui	Oui	bonne	Bonne connaisances
Masculin	Petits business	Secondaire	Chretien	Secondaire	Oui	non	mauvaises	Mauvaises connaissances
Masculin	Petits business	Secondaire	Chretien	Universté	Oui	Oui	mauvaises	Mauvaises connaissances
Masculin	Agriculteur	Secondaire	Chretien	Secondaire	Oui	Oui	mauvaises	Mauvaises connaissances
Féminin	Agriculteur	Primaire	Chretien	Primaire	Oui	Oui	mauvaises	Mauvaises connaissances
Masculin	student	Secondaire	Chretien	Secondaire	Oui	Oui	moyenne	Connaissances moyennes
Masculin	fonctionnaire	Université	Chretien	Primaire	Oui	Oui	moyenne	Connaissances moyennes
Masculin	fonctionnaire	Université	Chretien	Universté	Oui	Oui	moyenne	Connaissances moyennes
Masculin	Agriculteur	Sans niveau	Chretien	Secondaire	Oui	Oui	moyenne	Connaissances moyennes
Féminin	Ménagère	Secondaire	Chretien	Secondaire	Oui	Oui	moyenne	Connaissances moyennes
Féminin	Agriculteur	Primaire	Chretien	Primaire	Oui	non	mauvaises	Mauvaises connaissances
Masculin	Petits business	Secondaire	Musulman	Secondaire	Oui	Oui	moyenne	Connaissances moyennes
Masculin	Agriculteur	Secondaire	Chretien	Secondaire	Oui	Oui	moyenne	Connaissances moyennes
Masculin	Agriculteur	Primaire	Chretien	Primaire	Oui	Oui	bonne	Bonne connaisances
Masculin	Petits business	Secondaire	Chretien	Secondaire	Oui	Oui	moyenne	Connaissances moyennes
Féminin	Ménagère	Secondaire	Chretien	Secondaire	Oui	Oui	mauvaises	Mauvaises connaissances
Masculin	Petits business	Secondaire	Chretien	Secondaire	Oui	Oui	mauvaises	Mauvaises connaissances
Féminin	fonctionnaire	Secondaire	Chretien	Secondaire	Oui	Oui	mauvaises	Mauvaises connaissances
Masculin	Petits business	Secondaire	Chretien	Secondaire	Oui	Oui	mauvaises	Mauvaises connaissances
Masculin	Agriculteur	Secondaire	Chretien	Secondaire	Oui	Oui	moyenne	Connaissances moyennes
Féminin	Ménagère	Primaire	Chretien	Primaire	Oui	Oui	mauvaises	Mauvaises connaissances
Masculin	Petits business	Université	Chretien	Universté	Oui	Oui	mauvaises	Mauvaises connaissances
Féminin	Petits business	Secondaire	Chretien	Secondaire	Oui	Oui	mauvaises	Mauvaises connaissances
Féminin	Agriculteur	Primaire	Chretien	Primaire	Oui	Oui	ras
Masculin	Agriculteur	Primaire	Chretien	Primaire	Oui	Oui	moyenne	Connaissances moyennes
Masculin	Agriculteur	Primaire	Chretien	Primaire	Oui	non	mauvaises	Mauvaises connaissances
Masculin	Agriculteur	Secondaire	Chretien	Universté	Oui	Oui	mauvaises	Mauvaises connaissances
Masculin	Agriculteur	Primaire	Chretien	Secondaire	Oui	Oui	mauvaises	Mauvaises connaissances
Masculin	Agriculteur	Primaire	Chretien	Primaire	Oui	Oui	moyenne	Connaissances moyennes
Féminin	Petits business	Secondaire	Chretien	Secondaire	Oui	Oui	moyenne	Connaissances moyennes
Masculin	Agriculteur	Secondaire	Chretien	Secondaire	Oui	Oui	mauvaises	Mauvaises connaissances
Féminin	Ménagère	Sans niveau	Chretien	Universté	Oui	Oui	mauvaises	Mauvaises connaissances
Masculin	Petits business	Secondaire	Musulman	Secondaire	Oui	Oui	mauvaises	Mauvaises connaissances
Masculin	Agriculteur	Secondaire	Chretien	Secondaire	Oui	Oui	mauvaises	Mauvaises connaissances
Masculin	Agriculteur	Primaire	Chretien	Secondaire	Oui	Oui	mauvaises	Mauvaises connaissances
Féminin	Agriculteur	Secondaire	Chretien	Secondaire	Oui	Oui	mauvaises	Mauvaises connaissances
Féminin	fonctionnaire	Secondaire	Musulman	Universté	Oui	Oui	mauvaises	Mauvaises connaissances
Masculin	Agriculteur	Primaire	Chretien	Secondaire	Oui	Oui	mauvaises	Mauvaises connaissances
Masculin	Petits business	Secondaire	Chretien	Secondaire	Oui	Oui	mauvaises	Mauvaises connaissances
Masculin	Agriculteur	Primaire	Chretien	Primaire	Oui	Oui	moyenne	Connaissances moyennes
Féminin	fonctionnaire	Secondaire	Chretien	Secondaire	Oui	Oui	bonne	Bonne connaisances
Masculin	Agriculteur	Secondaire	Chretien	Secondaire	Oui	Oui	moyenne	Connaissances moyennes
Masculin	Petits business	Primaire	Chretien	Secondaire	Oui	non	mauvaises	Mauvaises connaissances
Masculin	Agriculteur	Secondaire	Chretien	Secondaire	Oui	Oui	mauvaises	Mauvaises connaissances
Masculin	Agriculteur	Secondaire	Chretien	Secondaire	Oui	Oui	moyenne	Connaissances moyennes
Masculin	Agriculteur	Primaire	Chretien	Secondaire	Oui	Oui	mauvaises	Mauvaises connaissances
Féminin	Petits business	Université	Chretien	Universté	Oui	Oui	moyenne	Connaissances moyennes
Masculin	student	Secondaire	Chretien	Secondaire	Oui	Oui	moyenne	Connaissances moyennes
Féminin	Ménagère	Primaire	Chretien	Universté	Oui	Oui	moyenne	Connaissances moyennes
Féminin	Agriculteur	Secondaire	Chretien	Secondaire	Oui	Oui	mauvaises	Mauvaises connaissances
Masculin	fonctionnaire	Secondaire	Chretien	Secondaire	Oui	Oui	bonne	Bonne connaisances
Féminin	Petits business	Primaire	Chretien	Secondaire	Oui	Oui	bonne	Bonne connaisances
Masculin	Petits business	Secondaire	Chretien	Secondaire	Oui	Oui	bonne	Bonne connaisances
Masculin	Agriculteur	Secondaire	Chretien	Secondaire	Oui	Oui	mauvaises	Mauvaises connaissances
Féminin	fonctionnaire	Université	Chretien	Universté	Oui	Oui	moyenne	Connaissances moyennes
Masculin	Petits business	Sans niveau	Musulman	Sans niveau	Oui	non	mauvaises	Mauvaises connaissances
Féminin	fonctionnaire	Université	Chretien	Secondaire	Oui	Oui	moyenne	Connaissances moyennes
Féminin	Ménagère	Primaire	Chretien	Primaire	Oui	Oui	bonne	Bonne connaisances
Masculin	Petits business	Université	Chretien	Universté	Oui	Oui	mauvaises	Mauvaises connaissances
Masculin	Petits business	Université	Paien	Universté	Oui	Oui	bonne	Bonne connaisances
Masculin	Petits business	Secondaire	Chretien	Secondaire	Oui	Oui	mauvaises	Mauvaises connaissances
Masculin	Petits business	Secondaire	Chretien	Secondaire	Oui	Oui	mauvaises	Mauvaises connaissances
Masculin	Agriculteur	Primaire	Chretien	Primaire	Oui	Oui	moyenne	Connaissances moyennes
Masculin	Petits business	Secondaire	Chretien	Secondaire	Oui	Oui	moyenne	Connaissances moyennes
Masculin	Agriculteur	Primaire	Chretien	Primaire	Oui	non	bonne	Mauvaises connaissances
Masculin	Petits business	Secondaire	Chretien	Secondaire	Oui	Oui	bonne	Bonne connaisances
Masculin	Petits business	Secondaire	Chretien	Secondaire	Oui	Oui	mauvaises	Mauvaises connaissances
Masculin	Petits business	Secondaire	Chretien	Universté	Oui	Oui	mauvaises	Mauvaises connaissances
Masculin	fonctionnaire	Secondaire	Chretien	Secondaire	Oui	Oui	moyenne	Connaissances moyennes
Masculin	Petits business	Secondaire	Chretien	Secondaire	Oui	Oui	mauvaises	Mauvaises connaissances
Masculin	Petits business	Secondaire	Chretien	Secondaire	Oui	Oui	mauvaises	Mauvaises connaissances
Féminin	Petits business	Secondaire	Chretien	Secondaire	Oui	Oui	mauvaises	Mauvaises connaissances
Féminin	fonctionnaire	Université	Chretien	Secondaire	Oui	Oui	mauvaises	Mauvaises connaissances
Féminin	Agriculteur	Université	Chretien	Secondaire	Oui	Oui	mauvaises	Mauvaises connaissances
Féminin	Agriculteur	Secondaire	Chretien	Secondaire	Oui	non	mauvaises	Mauvaises connaissances
Masculin	fonctionnaire	Université	Chretien	Universté	Oui	Oui	bonne	Bonne connaisances
Masculin	Petits business	Université	Chretien	Universté	Oui	Oui	bonne	Bonne connaisances
Masculin	Petits business	Secondaire	Chretien	Secondaire	Oui	Oui	moyenne	Connaissances moyennes
Masculin	fonctionnaire	Université	Chretien	Universté	Oui	Oui	moyenne	Connaissances moyennes
Masculin	fonctionnaire	Université	Paien	Secondaire	Oui	Oui	mauvaises	Mauvaises connaissances
Masculin	Petits business	Secondaire	Chretien	Secondaire	Oui	Oui	moyenne	Connaissances moyennes
Masculin	fonctionnaire	Université	Musulman	Universté	Oui	Oui	moyenne	Connaissances moyennes
Féminin	fonctionnaire	Université	Chretien	Universté	Oui	Oui	moyenne	Connaissances moyennes
Masculin	Agriculteur	Secondaire	Chretien	Secondaire	Oui	Oui	moyenne	Connaissances moyennes
Féminin	Petits business	Primaire	Chretien	Primaire	Oui	Oui	mauvaises	Mauvaises connaissances
Masculin	Agriculteur	Primaire	Chretien	Primaire	Oui	Oui	moyenne	Connaissances moyennes
Masculin	Petits business	Primaire	Chretien	Primaire	Oui	Oui	mauvaises	Mauvaises connaissances
Masculin	Petits business	Primaire	Musulman	Primaire	Oui	Oui	mauvaises	Mauvaises connaissances
Masculin	Petits business	Primaire	Musulman	Primaire	Oui	Oui	bonne	Bonne connaisances
Masculin	Petits business	Secondaire	Chretien	Secondaire	Oui	Oui	moyenne	Connaissances moyennes
Masculin	fonctionnaire	Secondaire	Chretien	Secondaire	Oui	Oui	moyenne	Connaissances moyennes
Masculin	Petits business	Secondaire	Chretien	Secondaire	Oui	Oui	moyenne	Connaissances moyennes
Masculin	Petits business	Secondaire	Chretien	Secondaire	Oui	Oui	mauvaises	Mauvaises connaissances
Masculin	Petits business	Secondaire	Chretien	Secondaire	Oui	Oui	moyenne	Connaissances moyennes
Masculin	Petits business	Secondaire	Paien	Secondaire	Oui	Oui	bonne	Bonne connaisances
Masculin	Petits business	Secondaire	Chretien	Secondaire	Oui	Oui	mauvaises	Mauvaises connaissances
Masculin	Petits business	Secondaire	Chretien	Secondaire	Oui	Oui	moyenne	Connaissances moyennes
Masculin	Petits business	Primaire	Chretien	Secondaire	Oui	Oui	mauvaises	Mauvaises connaissances
Masculin	Agriculteur	Secondaire	Chretien	Secondaire	Oui	Oui	mauvaises	Mauvaises connaissances
Masculin	Agriculteur	Secondaire	Chretien	Secondaire	Oui	Oui	mauvaises	Mauvaises connaissances
Masculin	Agriculteur	Secondaire	Chretien	Secondaire	Oui	Oui	mauvaises	Mauvaises connaissances
Féminin	Agriculteur	Secondaire	Chretien	Secondaire	Oui	Oui	mauvaises	Mauvaises connaissances
Masculin	Petits business	Secondaire	Chretien	Secondaire	Oui	Oui	mauvaises	Mauvaises connaissances
Masculin	fonctionnaire	Université	Chretien	Universté	Oui	Oui	mauvaises	Mauvaises connaissances
Masculin	Petits business	Secondaire	Chretien	Secondaire	Oui	Oui	bonne	Bonne connaisances
Masculin	Petits business	Secondaire	Musulman	Secondaire	Oui	Oui	moyenne	Connaissances moyennes
Masculin	Agriculteur	Sans niveau	Chretien	Sans niveau	Oui	Oui	moyenne	Connaissances moyennes
Masculin	Petits business	Secondaire	Chretien	Secondaire	Oui	Oui	mauvaises	Mauvaises connaissances
Masculin	Petits business	Secondaire	Chretien	Secondaire	Oui	Oui	moyenne	Connaissances moyennes
Masculin	fonctionnaire	Secondaire		Secondaire	Oui	Oui	moyenne	Connaissances moyennes
Masculin	Agriculteur	Primaire	Chretien	Secondaire	Oui	Oui	moyenne	Connaissances moyennes
Masculin	Agriculteur	Primaire	Chretien	Primaire	Oui	Oui	mauvaises	Mauvaises connaissances
Masculin	Petits business	Université	Chretien	Universté	Oui	Oui	bonne	Bonne connaisances
Masculin	Agriculteur	Primaire	Chretien	Secondaire	Oui	Oui	moyenne	Connaissances moyennes
Masculin	fonctionnaire	Secondaire	Chretien	Secondaire	Oui	Oui	bonne	Bonne connaisances
Féminin	Petits business	Université	Chretien	Universté	Oui	Oui	bonne	Bonne connaisances
Masculin	Petits business	Secondaire	Chretien	Secondaire	Oui	Oui	moyenne	Connaissances moyennes
Masculin	fonctionnaire	Université	Chretien	Universté	Oui	Oui	moyenne	Connaissances moyennes
Masculin	Petits business	Secondaire	Chretien	Secondaire	Oui	Oui	moyenne	Connaissances moyennes
Féminin	Petits business	Secondaire	Chretien	Secondaire	Oui	Oui	bonne	Bonne connaisances
Féminin	Petits business	Secondaire	Chretien	Secondaire	Oui	Oui	mauvaises	Mauvaises connaissances
Masculin	Petits business	Secondaire	Chretien	Universté	Oui	Oui	bonne	Bonne connaisances
Masculin	Petits business	Primaire	Chretien	Primaire	Oui	Oui	moyenne	Connaissances moyennes
Masculin	Agriculteur	Secondaire	Chretien	Secondaire	Oui	Oui	moyenne	Connaissances moyennes
Féminin	Petits business	Primaire	Chretien	Primaire	Oui	Oui	ras
Féminin	student	Secondaire	Chretien	Secondaire	Oui	Oui	mauvaises	Mauvaises connaissances
Masculin	fonctionnaire	Université	Musulman	Universté	Oui	Oui	moyenne	Connaissances moyennes
Féminin	Agriculteur	Secondaire	Chretien	Secondaire	Oui	Oui	mauvaises	Mauvaises connaissances
Masculin	Petits business	Secondaire	Chretien	Secondaire	Oui	Oui	bonne	Bonne connaisances
Masculin	Petits business	Secondaire	Chretien	Secondaire	Oui	non	ras	Mauvaises connaissances
Masculin	Agriculteur	Secondaire	Chretien	Secondaire	Oui	Oui	moyenne	Connaissances moyennes
Féminin	Petits business	Primaire	Chretien	Primaire	Oui	Oui	moyenne	Connaissances moyennes
Féminin	Petits business	Secondaire	Chretien	Secondaire	Oui	Oui	mauvaises	Mauvaises connaissances
Masculin	fonctionnaire	Secondaire	Chretien	Secondaire	Oui	Oui	moyenne	Connaissances moyennes
Masculin	fonctionnaire	Université	Chretien	Secondaire	Oui	Oui	bonne	Bonne connaisances
Masculin	Agriculteur	Primaire	Chretien	Primaire	Oui	Oui	moyenne	Connaissances moyennes
Masculin	fonctionnaire	Secondaire	Chretien	Secondaire	Oui	Oui	mauvaises	Mauvaises connaissances
Masculin	Petits business	Secondaire		Secondaire	Oui	Oui	mauvaises	Mauvaises connaissances
Masculin	Petits business	Secondaire	Chretien	Secondaire	Oui	Oui	bonne	Bonne connaisances
Masculin	fonctionnaire	Secondaire	Chretien	Secondaire	Oui	Oui	moyenne	Connaissances moyennes
Masculin	Petits business	Secondaire	Chretien	Secondaire	Oui	Oui	mauvaises	Mauvaises connaissances
Masculin	Petits business	Secondaire	Chretien	Secondaire	Oui	non	moyenne	Mauvaises connaissances
Féminin	Petits business	Secondaire	Chretien	Secondaire	Oui	non	mauvaises	Mauvaises connaissances
Féminin	Petits business	Secondaire	Chretien	Secondaire	Oui	Oui	moyenne	Connaissances moyennes
Masculin	Petits business	Université	Musulman	Secondaire	Oui	Oui	bonne	Bonne connaisances
Masculin	Agriculteur	Secondaire	Chretien	Secondaire	Oui	Oui	moyenne	Connaissances moyennes
Féminin	Petits business	Sans niveau	Chretien	Secondaire	Oui	Oui	mauvaises	Mauvaises connaissances
Masculin	fonctionnaire	Université	Chretien	Universté	Oui	Oui	moyenne	Connaissances moyennes
Masculin	Agriculteur	Secondaire	Chretien	Secondaire	Oui	Oui	moyenne	Connaissances moyennes
Féminin	Petits business	Secondaire	Chretien	Secondaire	Oui	Oui	mauvaises	Mauvaises connaissances
Masculin	Petits business	Secondaire		Secondaire	Oui	non	mauvaises	Mauvaises connaissances
Masculin	Petits business	Université	Chretien	Universté	Oui	Oui	bonne	Bonne connaisances
Masculin	Petits business	Secondaire	Chretien	Secondaire	Oui	Oui	mauvaises	Mauvaises connaissances
Masculin	Petits business	Secondaire	Chretien	Secondaire	Oui	Oui	mauvaises	Mauvaises connaissances
Masculin	Agriculteur	Primaire	Chretien	Primaire	Oui	Oui	mauvaises	Mauvaises connaissances
Masculin	Petits business	Sans niveau	Chretien	Secondaire	Oui	Oui	bonne	Bonne connaisances
Féminin	Ménagère	Secondaire	Chretien	Secondaire	Oui	Oui	moyenne	Connaissances moyennes
Masculin	Petits business	Sans niveau	Musulman	Sans niveau	Oui	Oui	moyenne	Connaissances moyennes
Masculin	Petits business	Secondaire	Chretien	Secondaire	Oui	Oui	bonne	Bonne connaisances
Masculin	Agriculteur	Secondaire	Chretien	Secondaire	Oui	Oui	mauvaises	Mauvaises connaissances
Masculin	Agriculteur	Sans niveau	Chretien	Sans niveau	Oui	Oui	mauvaises	Mauvaises connaissances
Masculin	Agriculteur	Sans niveau	Chretien	Secondaire	Oui	Oui	moyenne	Connaissances moyennes
Masculin	fonctionnaire	Université	Chretien	Universté	Oui	Oui	mauvaises	Mauvaises connaissances
Masculin	Petits business	Secondaire	Chretien	Secondaire	Oui	Oui	mauvaises	Mauvaises connaissances
Masculin	Petits business	Université	Chretien	Universté	Oui	Oui	moyenne	Connaissances moyennes
Masculin	Petits business	Secondaire	Chretien	Secondaire	Oui	Oui	mauvaises	Mauvaises connaissances
Féminin	Petits business	Secondaire	Chretien	Secondaire	Oui	Oui	mauvaises	Mauvaises connaissances
Masculin	Petits business	Secondaire	Chretien	Secondaire	Oui	Oui	mauvaises	Mauvaises connaissances
Féminin	Petits business	Secondaire	Chretien	Secondaire	Oui	Oui	mauvaises	Mauvaises connaissances
Masculin	Agriculteur	Secondaire	Chretien	Secondaire	Oui	Oui	bonne	Bonne connaisances
Masculin	Agriculteur	Secondaire	Chretien	Secondaire	Oui	Oui	moyenne	Connaissances moyennes
Masculin	Petits business	Secondaire	Chretien	Secondaire	Oui	Oui	moyenne	Connaissances moyennes
Masculin	Agriculteur	Secondaire	Chretien	Secondaire	Oui	Oui	mauvaises	Mauvaises connaissances
Féminin	fonctionnaire	Secondaire	Chretien	Secondaire	Oui	Oui	bonne	Bonne connaisances
Masculin	Agriculteur	Primaire	Chretien	Primaire	Oui	Oui	mauvaises	Mauvaises connaissances
Féminin	Ménagère	Primaire	Chretien	Secondaire	Oui	Oui	moyenne	Connaissances moyennes
Masculin	Agriculteur	Secondaire	Chretien	Secondaire	Oui	Oui	mauvaises	Mauvaises connaissances
Féminin	Agriculteur	Primaire	Chretien	Primaire	Oui	Oui	moyenne	Connaissances moyennes
Masculin	Petits business	Université	Chretien	Secondaire	Oui	non	bonne	Mauvaises connaissances
Féminin	Petits business	Sans niveau	Chretien	Sans niveau	Oui	Oui	mauvaises	Mauvaises connaissances
Féminin	Petits business	Secondaire	Chretien	Secondaire	Oui	Oui	mauvaises	Mauvaises connaissances
Féminin	Petits business	Primaire	Musulman	Primaire	Oui	Oui	moyenne	Connaissances moyennes
Féminin	Petits business	Secondaire	Chretien	Secondaire	Oui	Oui	mauvaises	Mauvaises connaissances
Masculin	Agriculteur	Secondaire	Chretien	Secondaire	Oui	Oui	moyenne	Connaissances moyennes
Masculin	Petits business	Primaire	Chretien	Primaire	Oui	Oui	mauvaises	Mauvaises connaissances
Féminin	Ménagère	Secondaire	Chretien	Secondaire	Oui	Oui	bonne	Bonne connaisances
Masculin	Petits business	Primaire	Chretien	Primaire	Oui	Oui	moyenne	Connaissances moyennes
Féminin	Ménagère	Primaire	Chretien	Primaire	Oui	Oui	bonne	Bonne connaisances
Masculin	Petits business	Sans niveau	Chretien	Sans niveau	Oui	non	bonne	Mauvaises connaissances
Masculin	Petits business	Primaire	Paien	Primaire	Oui	Oui	moyenne	Connaissances moyennes
Masculin	student	Secondaire	Chretien	Secondaire	Oui	Oui	mauvaises	Mauvaises connaissances
Masculin	Agriculteur	Secondaire	Chretien	Secondaire	Oui	Oui	moyenne	Connaissances moyennes
Féminin	Ménagère	Secondaire	Chretien	Secondaire	Oui	Oui	bonne	Bonne connaisances
Féminin	Ménagère	Secondaire	Chretien	Secondaire	Oui	Oui	bonne	Bonne connaisances
Féminin	Ménagère	Université	Chretien	Universté	Oui	Oui	moyenne	Connaissances moyennes
Masculin	Agriculteur	Secondaire	Chretien	Secondaire	Oui	Oui	bonne	Bonne connaisances
Féminin	Petits business	Secondaire	Chretien	Secondaire	Oui	Oui	bonne	Bonne connaisances
Masculin	Agriculteur	Primaire	Chretien	Primaire	Oui	Oui	bonne	Bonne connaisances
Masculin	Agriculteur	Secondaire	Chretien	Secondaire	Oui	Oui	mauvaises	Mauvaises connaissances
Masculin	Petits business	Université	Chretien	Universté	Oui	Oui	bonne	Bonne connaisances
Féminin	Petits business	Université	Chretien	Universté	Oui	Oui	bonne	Bonne connaisances
Féminin	Petits business	Primaire	Chretien	Secondaire	Oui	Oui	mauvaises	Mauvaises connaissances
Féminin	Agriculteur	Primaire	Chretien	Primaire	Oui	Oui	moyenne	Connaissances moyennes
Masculin	Agriculteur	Secondaire	Chretien	Secondaire	Oui	Oui	mauvaises	Mauvaises connaissances
Masculin	Petits business	Secondaire	Musulman	Secondaire	Oui	Oui	moyenne	Connaissances moyennes
Masculin	Agriculteur	Université	Chretien	Universté	Oui	Oui	bonne	Bonne connaisances
Masculin	fonctionnaire	Secondaire	Chretien	Secondaire	Oui	Oui	moyenne	Connaissances moyennes
Féminin	Petits business	Sans niveau	Chretien	Secondaire	Oui	Oui	mauvaises	Mauvaises connaissances
Masculin	Petits business	Secondaire	Chretien	Secondaire	Oui	Oui	mauvaises	Mauvaises connaissances
Masculin	fonctionnaire	Secondaire	Chretien	Secondaire	Oui	Oui	moyenne	Connaissances moyennes
Masculin	Petits business	Secondaire	Chretien	Secondaire	Oui	Oui	mauvaises	Mauvaises connaissances
Féminin	Petits business	Primaire	Chretien	Primaire	Oui	Oui	moyenne	Connaissances moyennes
Masculin	fonctionnaire	Secondaire	Chretien	Secondaire	Oui	non	mauvaises	Mauvaises connaissances
Masculin	Agriculteur	Secondaire	Chretien	Secondaire	Oui	Oui	bonne	Bonne connaisances
Féminin	Petits business	Primaire	Chretien	Primaire	Oui	Oui	mauvaises	Mauvaises connaissances
Masculin	Agriculteur	Primaire	Chretien	Secondaire	Oui	Oui	mauvaises	Mauvaises connaissances
Féminin	Petits business	Secondaire	Chretien	Secondaire	Oui	Oui	moyenne	Connaissances moyennes
Masculin	Agriculteur	Secondaire	Chretien	Secondaire	Oui	Oui	mauvaises	Mauvaises connaissances
Masculin	Petits business	Secondaire	Chretien	Universté	Oui	Oui	mauvaises	Mauvaises connaissances
Masculin	Agriculteur	Secondaire	Chretien	Secondaire	Oui	Oui	moyenne	Connaissances moyennes
Masculin	Agriculteur	Secondaire	Chretien	Secondaire	Oui	Oui	bonne	Bonne connaisances
Masculin	Agriculteur	Secondaire	Chretien	Secondaire	Oui	Oui	bonne	Bonne connaisances
Féminin	fonctionnaire	Université	Chretien	Secondaire	Oui	Oui	moyenne	Connaissances moyennes
Masculin	Petits business	Secondaire	Chretien	Secondaire	Oui	Oui	mauvaises	Mauvaises connaissances
Masculin	Petits business	Secondaire	Chretien	Secondaire	Oui	Oui	mauvaises	Mauvaises connaissances
Masculin	Agriculteur	Secondaire	Chretien	Secondaire	Oui	Oui	mauvaises	Mauvaises connaissances
Féminin	Petits business	Secondaire	Chretien	Universté	Oui	Oui	bonne	Bonne connaisances
Masculin	Petits business	Secondaire	Chretien	Secondaire	Oui	Oui	mauvaises	Mauvaises connaissances
Masculin	Petits business	Secondaire	Chretien	Secondaire	Oui	Oui	mauvaises	Mauvaises connaissances
Féminin	Petits business	Secondaire	Chretien	Secondaire	Oui	Oui	mauvaises	Mauvaises connaissances
Féminin	Petits business	Primaire	Chretien	Primaire	Oui	Oui	moyenne	Connaissances moyennes
Féminin	Ménagère	Secondaire	Chretien	Secondaire	Oui	Oui	mauvaises	Mauvaises connaissances
Masculin	Petits business	Secondaire	Chretien	Secondaire	Oui	Oui	moyenne	Connaissances moyennes
Masculin	student	Université	Chretien	Universté	Oui	Oui	moyenne	Connaissances moyennes
Masculin	Agriculteur	Secondaire	Chretien	Secondaire	Oui	Oui	moyenne	Connaissances moyennes
Féminin	fonctionnaire	Secondaire	Chretien	Secondaire	Oui	Oui	moyenne	Connaissances moyennes
Féminin	Petits business	Primaire	Chretien	Secondaire	Oui	Oui	moyenne	Connaissances moyennes
Masculin	Agriculteur	Université	Chretien	Secondaire	Oui	Oui	moyenne	Connaissances moyennes
Masculin	fonctionnaire	Secondaire	Chretien	Secondaire	Oui	Oui	mauvaises	Mauvaises connaissances
Féminin	Ménagère	Secondaire	Chretien	Secondaire	Oui	Oui	moyenne	Connaissances moyennes
Masculin	Petits business	Secondaire	Chretien	Secondaire	Oui	Oui	mauvaises	Mauvaises connaissances
Masculin	Agriculteur	Université	Chretien	Universté	Oui	Oui	mauvaises	Mauvaises connaissances
Masculin	Petits business	Secondaire	Chretien	Secondaire	Oui	Oui	mauvaises	Mauvaises connaissances
Masculin	Agriculteur	Secondaire	Chretien	Secondaire	Oui	Oui	mauvaises	Mauvaises connaissances
Masculin	Agriculteur	Primaire	Chretien	Primaire	Oui	Oui	mauvaises	Mauvaises connaissances
Masculin	Ménagère	Primaire	Chretien	Primaire	Oui	Oui	mauvaises	Mauvaises connaissances
Masculin	Petits business	Secondaire	Chretien	Secondaire	Oui	Oui	mauvaises	Mauvaises connaissances
Masculin	fonctionnaire	Université	Chretien	Universté	Oui	Oui	moyenne	Connaissances moyennes
Masculin	Petits business	Secondaire	Chretien	Universté	Oui	Oui	mauvaises	Mauvaises connaissances
Masculin	Agriculteur	Primaire		Primaire	Oui	Oui	bonne	Bonne connaisances
Masculin	Agriculteur	Secondaire	Chretien	Secondaire	Oui	Oui	bonne	Bonne connaisances
Féminin	Petits business	Secondaire	Chretien	Secondaire	Oui	Oui	mauvaises	Mauvaises connaissances
Masculin	Petits business	Secondaire	Chretien	Secondaire	Oui	Oui	bonne	Bonne connaisances
Masculin	Agriculteur	Secondaire	Chretien	Secondaire	Oui	Oui	bonne	Bonne connaisances
Masculin	Agriculteur	Secondaire	Chretien	Secondaire	Oui	Oui	moyenne	Connaissances moyennes
Masculin	Petits business	Primaire	Musulman	Primaire	Oui	Oui	moyenne	Connaissances moyennes
Masculin	Agriculteur	Primaire	Chretien	Primaire	Oui	Oui	mauvaises	Mauvaises connaissances
Masculin	Agriculteur	Secondaire	Chretien	Secondaire	Oui	Oui	mauvaises	Mauvaises connaissances
Féminin	Agriculteur	Secondaire	Chretien	Secondaire	Oui	Oui	moyenne	Connaissances moyennes
Masculin	Agriculteur	Primaire	Chretien	Primaire	Oui	Oui	moyenne	Connaissances moyennes
Masculin	Agriculteur	Secondaire	Chretien	Secondaire	Oui	Oui	moyenne	Connaissances moyennes
Féminin	Petits business	Primaire	Chretien	Primaire	Oui	Oui	moyenne	Connaissances moyennes
Masculin	Agriculteur	Primaire	Paien	Primaire	Oui	Oui	mauvaises	Mauvaises connaissances
Féminin	Agriculteur	Primaire	Chretien	Primaire	Oui	Oui	mauvaises	Mauvaises connaissances
Masculin	Agriculteur	Primaire	Chretien	Primaire	Oui	non	mauvaises	Mauvaises connaissances
Féminin	Agriculteur	Secondaire	Chretien	Secondaire	Oui	Oui	mauvaises	Mauvaises connaissances
Masculin	Petits business	Secondaire	Chretien	Secondaire	Oui	Oui	mauvaises	Mauvaises connaissances
Masculin	Agriculteur	Secondaire	Chretien	Secondaire	Oui	Oui	bonne	Bonne connaisances
Masculin	Agriculteur	Secondaire	Chretien	Secondaire	Oui	Oui	mauvaises	Mauvaises connaissances
Féminin	Agriculteur	Secondaire	Chretien	Secondaire	Oui	Oui	mauvaises	Mauvaises connaissances
Féminin	Agriculteur	Primaire	Chretien	Primaire	Oui	Oui	bonne	Bonne connaisances
Masculin	fonctionnaire	Université	Chretien	Universté	Oui	Oui	mauvaises	Mauvaises connaissances
Masculin	Agriculteur	Secondaire	Chretien	Secondaire	Oui	Oui	mauvaises	Mauvaises connaissances
Masculin	Petits business	Secondaire	Chretien	Secondaire	Oui	Oui	mauvaises	Mauvaises connaissances
Masculin	Agriculteur	Primaire	Chretien	Primaire	Oui	non	mauvaises	Mauvaises connaissances
Masculin	Agriculteur	Secondaire	Chretien	Secondaire	Oui	non	mauvaises	Mauvaises connaissances
Masculin	Petits business	Primaire	Chretien	Primaire	Oui	Oui	mauvaises	Mauvaises connaissances
Masculin	Petits business	Primaire	Chretien	Primaire	Oui	Oui	moyenne	Connaissances moyennes
Féminin	Petits business	Primaire	Chretien	Primaire	Oui	Oui	mauvaises	Mauvaises connaissances
Masculin	Agriculteur	Primaire	Chretien	Primaire	Oui	Oui	mauvaises	Mauvaises connaissances
Masculin	Petits business	Secondaire	Chretien	Secondaire	Oui	Oui	moyenne	Connaissances moyennes
Féminin	fonctionnaire	Secondaire	Chretien	Secondaire	Oui	Oui	moyenne	Connaissances moyennes
Masculin	fonctionnaire	Secondaire	Chretien	Secondaire	Oui	Oui	moyenne	Connaissances moyennes
Masculin	fonctionnaire	Université	Chretien	Universté	Oui	Oui	moyenne	Connaissances moyennes
Masculin	Agriculteur	Université	Chretien	Secondaire	Oui	Oui	moyenne	Connaissances moyennes
Masculin	Petits business	Secondaire	Chretien	Secondaire	Oui	Oui	bonne	Bonne connaisances
Masculin	Petits business	Primaire	Musulman	Primaire	Oui	non	moyenne	Mauvaises connaissances
Masculin	Petits business	Primaire	Musulman	Primaire	Oui	Oui	bonne	Bonne connaisances
Masculin	Petits business	Secondaire	Chretien	Secondaire	Oui	Oui	bonne	Bonne connaisances
Masculin	Petits business	Secondaire	Chretien	Secondaire	Oui	Oui	mauvaises	Mauvaises connaissances
Masculin	fonctionnaire	Université	Chretien	Universté	Oui	Oui	bonne	Bonne connaisances
Féminin	Ménagère	Primaire	Chretien	Primaire	Oui	Oui	mauvaises	Mauvaises connaissances
Féminin	Ménagère	Secondaire	Chretien	Universté	Oui	Oui	moyenne	Connaissances moyennes
Masculin	Agriculteur	Secondaire	Chretien	Secondaire	Oui	Oui	moyenne	Connaissances moyennes
Masculin	Ménagère	Secondaire	Paien	Secondaire	Oui	Oui	mauvaises	Mauvaises connaissances
Féminin	fonctionnaire	Secondaire	Chretien	Secondaire	Oui	Oui	bonne	Bonne connaisances
Masculin	Agriculteur	Secondaire	Chretien	Secondaire	Oui	Oui	moyenne	Connaissances moyennes
Masculin	Petits business	Secondaire	Chretien	Secondaire	Oui	Oui	moyenne	Connaissances moyennes
Féminin	Petits business	Secondaire	Chretien	Secondaire	Oui	Oui	bonne	Bonne connaisances
Féminin	Agriculteur	Secondaire	Chretien	Secondaire	Oui	Oui	bonne	Bonne connaisances
Masculin	Petits business	Secondaire	Chretien	Secondaire	Oui	Oui	moyenne	Connaissances moyennes
Masculin	Petits business	Secondaire	Chretien	Secondaire	Oui	Oui	mauvaises	Mauvaises connaissances
Masculin	fonctionnaire	Secondaire	Chretien	Secondaire	Oui	Oui	bonne	Bonne connaisances
Féminin	fonctionnaire	Université	Chretien	Universté	Oui	Oui	bonne	Bonne connaisances
Masculin	Petits business	Secondaire	Chretien	Secondaire	Oui	Oui	mauvaises	Mauvaises connaissances
Masculin	Agriculteur	Primaire	Chretien	Secondaire	Oui	Oui	mauvaises	Mauvaises connaissances
Féminin	Petits business	Secondaire	Chretien	Secondaire	Oui	Oui	moyenne	Connaissances moyennes
Masculin	Agriculteur	Secondaire	Chretien	Universté	Oui	Oui	moyenne	Connaissances moyennes
Féminin	Agriculteur	Primaire	Chretien	Secondaire	Oui	Oui	bonne	Bonne connaisances
Masculin	fonctionnaire	Secondaire	Chretien	Secondaire	Oui	Oui	moyenne	Connaissances moyennes
Féminin	Ménagère	Secondaire	Chretien	Secondaire	Oui	Oui	mauvaises	Mauvaises connaissances
Masculin	Agriculteur	Secondaire	Chretien	Secondaire	Oui	Oui	moyenne	Connaissances moyennes
Masculin	Agriculteur	Primaire	Chretien	Universté	Oui	Oui	mauvaises	Mauvaises connaissances
Masculin	Petits business	Secondaire	Chretien	Secondaire	Oui	Oui	mauvaises	Mauvaises connaissances
Féminin	Petits business	Secondaire	Chretien	Secondaire	Oui	Oui	moyenne	Connaissances moyennes
Masculin	Petits business	Université	Chretien	Universté	Oui	Oui	bonne	Bonne connaisances
Féminin	fonctionnaire	Secondaire	Chretien	Secondaire	Oui	Oui	moyenne	Connaissances moyennes
Masculin	Agriculteur	Primaire	Chretien	Universté	Oui	Oui	bonne	Bonne connaisances
Masculin	Agriculteur	Secondaire	Chretien	Secondaire	Oui	Oui	bonne	Bonne connaisances
Masculin	fonctionnaire	Université	Chretien	Secondaire	Oui	Oui	mauvaises	Mauvaises connaissances
Féminin	Ménagère	Primaire	Chretien	Secondaire	Oui	Oui	moyenne	Connaissances moyennes
Féminin	Petits business	Secondaire	Chretien	Secondaire	Oui	Oui	moyenne	Connaissances moyennes
Masculin	Agriculteur	Secondaire	Chretien	Secondaire	Oui	Oui	mauvaises	Mauvaises connaissances
Féminin	Ménagère	Secondaire	Chretien	Secondaire	Oui	Oui	bonne	Bonne connaisances
Masculin	Petits business	Secondaire	Chretien	Secondaire	Oui	Oui	moyenne	Connaissances moyennes
Masculin	Agriculteur	Secondaire	Chretien	Secondaire	Oui	Oui	mauvaises	Mauvaises connaissances
Masculin	Agriculteur	Primaire	Chretien	Primaire	Oui	Oui	mauvaises	Mauvaises connaissances
Masculin	fonctionnaire	Université	Chretien	Universté	Oui	Oui	mauvaises	Mauvaises connaissances
Masculin	fonctionnaire	Université	Chretien	Secondaire	Oui	Oui	moyenne	Connaissances moyennes
Féminin	Ménagère	Primaire	Chretien	Secondaire	Oui	Oui	mauvaises	Mauvaises connaissances
Féminin	Petits business	Secondaire	Chretien	Secondaire	Oui	Oui	bonne	Bonne connaisances
Masculin	fonctionnaire	Secondaire	Chretien	Secondaire	Oui	Oui	moyenne	Connaissances moyennes
Féminin	fonctionnaire	Secondaire	Chretien	Secondaire	Oui	Oui	mauvaises	Mauvaises connaissances
Féminin	Ménagère	Secondaire	Chretien	Secondaire	Oui	Oui	moyenne	Connaissances moyennes
Féminin	Petits business	Secondaire	Chretien	Secondaire	Oui	Oui	mauvaises	Mauvaises connaissances
Masculin	fonctionnaire	Université	Chretien	Universté	Oui	Oui	bonne	Bonne connaisances
Masculin	Petits business	Secondaire	Chretien	Secondaire	Oui	Oui	bonne	Bonne connaisances
Masculin	Petits business	Secondaire	Chretien	Secondaire	Oui	Oui	mauvaises	Mauvaises connaissances
Masculin	Petits business	Primaire	Chretien	Secondaire	Oui	Oui	mauvaises	Mauvaises connaissances
Masculin	fonctionnaire	Secondaire	Chretien	Secondaire	Oui	Oui	bonne	Bonne connaisances

## Sheet: Pratiques vis à vis du Palu
Sexe du CM	Proféssion du CM	Niveau d'étude CM	Réligion du CM	Niveau d'étude du répondant	Possession de MILDA	MILDA sur tous les lits	Utilisation régulière de MILDA	Pratiques vis-à-vis du Paludisme
Féminin	Petits business	Secondaire	Chretien	Secondaire	non	Non	non	Mauvaises pratiques
Masculin	Agriculteur	Secondaire	Musulman	Secondaire	oui	Oui	oui	Bonnes pratiques
Masculin	Petits business	Primaire	Chretien	Sans niveau	oui	Non	oui	Bonnes pratiques
Féminin	Petits business	Secondaire	Chretien	Secondaire	oui	Oui	non	Mauvaises pratiques
Masculin	fonctionnaire	Secondaire	Chretien	Secondaire	oui	Non	oui	Bonnes pratiques
Masculin	Agriculteur	Université	Chretien	Universté	oui	Non	non	Mauvaises pratiques
Féminin	Ménagère	Secondaire	Chretien	Secondaire	oui	Oui	oui	Bonnes pratiques
Masculin	Agriculteur	Secondaire	Chretien	Secondaire	oui	Non	non	Mauvaises pratiques
Féminin	Ménagère	Primaire	Chretien	Secondaire	oui	Non	non	Mauvaises pratiques
Masculin	Agriculteur	Primaire	Chretien	Secondaire	oui	Oui	oui	Bonnes pratiques
Masculin	Agriculteur	Université	Chretien	Universté	oui	Non	non	Mauvaises pratiques
Masculin	Agriculteur	Secondaire	Chretien	Secondaire	oui	Non	non	Mauvaises pratiques
Féminin	Ménagère	Secondaire	Chretien	Secondaire	oui	Oui	oui	Bonnes pratiques
Féminin	Ménagère	Secondaire	Chretien	Primaire	oui	Oui	non	Mauvaises pratiques
Féminin	Petits business	Secondaire	Chretien	Secondaire	oui	Non	oui	Bonnes pratiques
Féminin	Petits business	Université	Chretien	Universté	oui	Non	oui	Bonnes pratiques
Masculin	Agriculteur	Secondaire	Paien	Secondaire	non	Non	non	Mauvaises pratiques
Masculin	Petits business	Secondaire	Chretien	Secondaire	non	Non	non	Mauvaises pratiques
Masculin	Petits business	Secondaire	Chretien	Secondaire	oui	Non	oui	Bonnes pratiques
Masculin	student	Secondaire	Chretien	Secondaire	non	Non	non	Mauvaises pratiques
Masculin	Agriculteur	Primaire	Chretien	Primaire	oui	Non	oui	Bonnes pratiques
Féminin	Ménagère	Secondaire	Chretien	Secondaire	oui	Non	non	Mauvaises pratiques
Masculin	Agriculteur	Université	Chretien	Secondaire	oui	Oui	oui	Bonnes pratiques
Masculin	Agriculteur	Secondaire	Chretien	Secondaire	oui	Oui	non	Mauvaises pratiques
Féminin	Ménagère	Primaire	Chretien	Secondaire	oui	Oui	non	Mauvaises pratiques
Féminin	Ménagère	Secondaire	Chretien	Secondaire	oui	Non	non	Mauvaises pratiques
Féminin	fonctionnaire	Université	Chretien	Secondaire	oui	Non	oui	Bonnes pratiques
Masculin	Agriculteur	Secondaire	Chretien	Secondaire	oui	Oui	non	Mauvaises pratiques
Masculin	Agriculteur	Secondaire	Chretien	Secondaire	oui	Non	non	Mauvaises pratiques
Féminin	Petits business	Secondaire	Chretien	Secondaire	oui	Non	non	Mauvaises pratiques
Masculin	Agriculteur	Secondaire	Chretien	Secondaire	oui	Non	oui	Bonnes pratiques
Masculin	Agriculteur	Secondaire	Chretien	Secondaire	oui	Non	oui	Bonnes pratiques
Masculin	student	Secondaire	Chretien	Secondaire	non	Non	non	Mauvaises pratiques
Masculin	Agriculteur	Secondaire	Chretien	Secondaire	oui	Non	oui	Bonnes pratiques
Masculin	Agriculteur	Primaire	Chretien	Secondaire	oui	Non	oui	Bonnes pratiques
Féminin	Agriculteur	Sans niveau	Paien	Sans niveau	oui	Non	non	Mauvaises pratiques
Masculin	Petits business	Secondaire	Chretien	Secondaire	oui	Oui	oui	Bonnes pratiques
Masculin	Petits business	Primaire	Paien	Primaire	oui	Oui	oui	Bonnes pratiques
Masculin	Agriculteur	Primaire	Chretien	Primaire	non	Non	non	Mauvaises pratiques
Masculin	Petits business	Primaire	Musulman	Secondaire	oui	Non	non	Mauvaises pratiques
Masculin	fonctionnaire	Université	Chretien	Universté	oui	Oui	oui	Bonnes pratiques
Masculin	Petits business	Secondaire	Chretien	Secondaire	oui	Oui	oui	Bonnes pratiques
Masculin	fonctionnaire	Primaire	Chretien	Secondaire	oui	Non	non	Mauvaises pratiques
Masculin	Petits business	Secondaire	Chretien	Secondaire	oui	Non	oui	Bonnes pratiques
Masculin	Petits business	Primaire	Paien	Primaire	oui	Oui	oui	Bonnes pratiques
Masculin	Petits business	Secondaire	Chretien	Secondaire	oui	Non	oui	Bonnes pratiques
Masculin	Petits business	Secondaire	Chretien	Secondaire	oui	Oui	non	Mauvaises pratiques
Masculin	Agriculteur	Primaire	Chretien	Universté	oui	Non	non	Mauvaises pratiques
Masculin	Agriculteur	Secondaire	Chretien	Secondaire	oui	Oui	oui	Bonnes pratiques
Masculin	Petits business	Secondaire	Chretien	Universté	oui	Oui	oui	Bonnes pratiques
Masculin	student	Secondaire	Chretien	Secondaire	oui	Oui	oui	Bonnes pratiques
Masculin	Petits business	Secondaire	Chretien	Secondaire	oui	Oui	oui	Bonnes pratiques
Féminin	fonctionnaire	Université	Chretien	Universté	oui	Oui	oui	Bonnes pratiques
Masculin	Agriculteur	Primaire	Chretien	Secondaire	oui	Oui	non	Mauvaises pratiques
Féminin	Agriculteur	Secondaire	Chretien	Universté	oui	Oui	oui	Bonnes pratiques
Masculin	Agriculteur	Primaire	Chretien	Secondaire	oui	Non	non	Mauvaises pratiques
Masculin	Agriculteur	Secondaire	Chretien	Secondaire	oui	Non	oui	Bonnes pratiques
Féminin	Petits business	Secondaire	Chretien	Secondaire	oui	Non	oui	Bonnes pratiques
Masculin	Agriculteur	Secondaire	Chretien	Secondaire	oui	Oui	oui	Bonnes pratiques
Masculin	Agriculteur	Université	Chretien	Secondaire	oui	Oui	oui	Bonnes pratiques
Féminin	Petits business	Primaire	Musulman	Secondaire	oui	Non	oui	Bonnes pratiques
Féminin	Petits business	Secondaire	Chretien	Secondaire	oui	Oui	non	Mauvaises pratiques
Féminin	Petits business	Secondaire	Chretien	Secondaire	oui	Non	oui	Bonnes pratiques
Féminin	Petits business	Primaire	Chretien	Primaire	oui	Oui	oui	Bonnes pratiques
Masculin	Agriculteur	Secondaire	Chretien	Secondaire	oui	Oui	oui	Bonnes pratiques
Féminin	Petits business	Université	Chretien	Universté	oui	Non	oui	Bonnes pratiques
Masculin	fonctionnaire	Université	Chretien	Universté	oui	Oui	non	Mauvaises pratiques
Masculin	fonctionnaire	Primaire	Chretien	Primaire	oui	Non	non	Mauvaises pratiques
Masculin	fonctionnaire	Université	Chretien	Universté	oui	Non	oui	Bonnes pratiques
Masculin	Petits business	Secondaire	Chretien	Secondaire	oui	Oui	oui	Bonnes pratiques
Masculin	Petits business	Secondaire	Chretien	Secondaire	oui	Oui	oui	Bonnes pratiques
Masculin	Agriculteur	Secondaire	Musulman	Secondaire	oui	Non	oui	Bonnes pratiques
Masculin	Petits business	Secondaire	Chretien	Secondaire	non	Oui	non	Mauvaises pratiques
Masculin	Petits business	Primaire	Chretien	Primaire	oui	Non	non	Mauvaises pratiques
Masculin	Petits business	Secondaire	Chretien	Secondaire	oui	Non	oui	Bonnes pratiques
Masculin	Petits business	Secondaire	Chretien	Universté	oui	Oui	oui	Bonnes pratiques
Masculin	Agriculteur	Secondaire	Chretien	Secondaire	oui	Non	non	Mauvaises pratiques
Féminin	Agriculteur	Primaire	Chretien	Primaire	oui	Non	oui	Bonnes pratiques
Masculin	student	Secondaire	Chretien	Secondaire	oui	Non	oui	Bonnes pratiques
Masculin	fonctionnaire	Université	Chretien	Primaire	oui	Non	oui	Bonnes pratiques
Masculin	fonctionnaire	Université	Chretien	Universté	oui	Oui	oui	Bonnes pratiques
Masculin	Agriculteur	Sans niveau	Chretien	Secondaire	oui	Non	oui	Bonnes pratiques
Féminin	Ménagère	Secondaire	Chretien	Secondaire	oui	Non	oui	Bonnes pratiques
Féminin	Agriculteur	Primaire	Chretien	Primaire	oui	Oui	oui	Bonnes pratiques
Masculin	Petits business	Secondaire	Musulman	Secondaire	oui	Non	oui	Bonnes pratiques
Masculin	Agriculteur	Secondaire	Chretien	Secondaire	oui	Non	oui	Bonnes pratiques
Masculin	Agriculteur	Primaire	Chretien	Primaire	oui	Non	oui	Bonnes pratiques
Masculin	Petits business	Secondaire	Chretien	Secondaire	oui	Non	oui	Bonnes pratiques
Féminin	Ménagère	Secondaire	Chretien	Secondaire	oui	Non	oui	Bonnes pratiques
Masculin	Petits business	Secondaire	Chretien	Secondaire	oui	Non	oui	Bonnes pratiques
Féminin	fonctionnaire	Secondaire	Chretien	Secondaire	oui	Non	oui	Bonnes pratiques
Masculin	Petits business	Secondaire	Chretien	Secondaire	oui	Non	oui	Bonnes pratiques
Masculin	Agriculteur	Secondaire	Chretien	Secondaire	oui	Non	non	Mauvaises pratiques
Féminin	Ménagère	Primaire	Chretien	Primaire	oui	Non	oui	Bonnes pratiques
Masculin	Petits business	Université	Chretien	Universté	oui	Non	oui	Bonnes pratiques
Féminin	Petits business	Secondaire	Chretien	Secondaire	oui	Oui	oui	Bonnes pratiques
Féminin	Agriculteur	Primaire	Chretien	Primaire	oui	Non	oui	Bonnes pratiques
Masculin	Agriculteur	Primaire	Chretien	Primaire	non	Non	non	Mauvaises pratiques
Masculin	Agriculteur	Primaire	Chretien	Primaire	oui	Non	oui	Bonnes pratiques
Masculin	Agriculteur	Secondaire	Chretien	Universté	oui	Non	oui	Bonnes pratiques
Masculin	Agriculteur	Primaire	Chretien	Secondaire	oui	Non	oui	Bonnes pratiques
Masculin	Agriculteur	Primaire	Chretien	Primaire	oui	Non	non	Mauvaises pratiques
Féminin	Petits business	Secondaire	Chretien	Secondaire	oui	Non	non	Mauvaises pratiques
Masculin	Agriculteur	Secondaire	Chretien	Secondaire	oui	Non	oui	Bonnes pratiques
Féminin	Ménagère	Sans niveau	Chretien	Universté	oui	Non	oui	Bonnes pratiques
Masculin	Petits business	Secondaire	Musulman	Secondaire	oui	Oui	non	Mauvaises pratiques
Masculin	Agriculteur	Secondaire	Chretien	Secondaire	oui	Oui	oui	Bonnes pratiques
Masculin	Agriculteur	Primaire	Chretien	Secondaire	oui	Oui	oui	Bonnes pratiques
Féminin	Agriculteur	Secondaire	Chretien	Secondaire	oui	Oui	oui	Bonnes pratiques
Féminin	fonctionnaire	Secondaire	Musulman	Universté	oui	Non	oui	Bonnes pratiques
Masculin	Agriculteur	Primaire	Chretien	Secondaire	oui	Non	oui	Bonnes pratiques
Masculin	Petits business	Secondaire	Chretien	Secondaire	oui	Non	oui	Bonnes pratiques
Masculin	Agriculteur	Primaire	Chretien	Primaire	oui	Oui	non	Mauvaises pratiques
Féminin	fonctionnaire	Secondaire	Chretien	Secondaire	oui	Oui	oui	Bonnes pratiques
Masculin	Agriculteur	Secondaire	Chretien	Secondaire	oui	Non	non	Mauvaises pratiques
Masculin	Petits business	Primaire	Chretien	Secondaire	oui	Oui	non	Mauvaises pratiques
Masculin	Agriculteur	Secondaire	Chretien	Secondaire	oui	Non	oui	Bonnes pratiques
Masculin	Agriculteur	Secondaire	Chretien	Secondaire	oui	Oui	oui	Bonnes pratiques
Masculin	Agriculteur	Primaire	Chretien	Secondaire	oui	Oui	non	Mauvaises pratiques
Féminin	Petits business	Université	Chretien	Universté	oui	Oui	oui	Bonnes pratiques
Masculin	student	Secondaire	Chretien	Secondaire	oui	Oui	oui	Bonnes pratiques
Féminin	Ménagère	Primaire	Chretien	Universté	oui	Non	oui	Bonnes pratiques
Féminin	Agriculteur	Secondaire	Chretien	Secondaire	oui	Non	oui	Bonnes pratiques
Masculin	fonctionnaire	Secondaire	Chretien	Secondaire	oui	Oui	non	Mauvaises pratiques
Féminin	Petits business	Primaire	Chretien	Secondaire	oui	Non	oui	Bonnes pratiques
Masculin	Petits business	Secondaire	Chretien	Secondaire	oui	Non	oui	Bonnes pratiques
Masculin	Agriculteur	Secondaire	Chretien	Secondaire	oui	Non	non	Mauvaises pratiques
Féminin	fonctionnaire	Université	Chretien	Universté	oui	Oui	oui	Bonnes pratiques
Masculin	Petits business	Sans niveau	Musulman	Sans niveau	oui	Oui	oui	Bonnes pratiques
Féminin	fonctionnaire	Université	Chretien	Secondaire	oui	Non	oui	Bonnes pratiques
Féminin	Ménagère	Primaire	Chretien	Primaire	non	Non	non	Mauvaises pratiques
Masculin	Petits business	Université	Chretien	Universté	oui	Oui	oui	Bonnes pratiques
Masculin	Petits business	Université	Paien	Universté	oui	Non	non	Mauvaises pratiques
Masculin	Petits business	Secondaire	Chretien	Secondaire	oui	Oui	oui	Bonnes pratiques
Masculin	Petits business	Secondaire	Chretien	Secondaire	oui	Oui	oui	Bonnes pratiques
Masculin	Agriculteur	Primaire	Chretien	Primaire	oui	Non	oui	Bonnes pratiques
Masculin	Petits business	Secondaire	Chretien	Secondaire	non	Non	non	Mauvaises pratiques
Masculin	Agriculteur	Primaire	Chretien	Primaire	oui	Non	oui	Bonnes pratiques
Masculin	Petits business	Secondaire	Chretien	Secondaire	oui	Oui	oui	Bonnes pratiques
Masculin	Petits business	Secondaire	Chretien	Secondaire	oui	Non	oui	Bonnes pratiques
Masculin	Petits business	Secondaire	Chretien	Universté	oui	Non	oui	Bonnes pratiques
Masculin	fonctionnaire	Secondaire	Chretien	Secondaire	oui	Non	oui	Bonnes pratiques
Masculin	Petits business	Secondaire	Chretien	Secondaire	oui	Oui	oui	Bonnes pratiques
Masculin	Petits business	Secondaire	Chretien	Secondaire	oui	Oui	oui	Bonnes pratiques
Féminin	Petits business	Secondaire	Chretien	Secondaire	oui	Oui	oui	Bonnes pratiques
Féminin	fonctionnaire	Université	Chretien	Secondaire	oui	Non	oui	Bonnes pratiques
Féminin	Agriculteur	Université	Chretien	Secondaire	oui	Oui	non	Mauvaises pratiques
Féminin	Agriculteur	Secondaire	Chretien	Secondaire	oui	Oui	oui	Bonnes pratiques
Masculin	fonctionnaire	Université	Chretien	Universté	oui	Oui	oui	Bonnes pratiques
Masculin	Petits business	Université	Chretien	Universté	oui	Non	oui	Bonnes pratiques
Masculin	Petits business	Secondaire	Chretien	Secondaire	oui	Non	oui	Bonnes pratiques
Masculin	fonctionnaire	Université	Chretien	Universté	oui	Non	oui	Bonnes pratiques
Masculin	fonctionnaire	Université	Paien	Secondaire	oui	Oui	non	Mauvaises pratiques
Masculin	Petits business	Secondaire	Chretien	Secondaire	oui	Non	oui	Bonnes pratiques
Masculin	fonctionnaire	Université	Musulman	Universté	oui	Non	non	Mauvaises pratiques
Féminin	fonctionnaire	Université	Chretien	Universté	oui	Oui	oui	Bonnes pratiques
Masculin	Agriculteur	Secondaire	Chretien	Secondaire	oui	Oui	non	Mauvaises pratiques
Féminin	Petits business	Primaire	Chretien	Primaire	oui	Non	oui	Bonnes pratiques
Masculin	Agriculteur	Primaire	Chretien	Primaire	oui	Oui	oui	Bonnes pratiques
Masculin	Petits business	Primaire	Chretien	Primaire	oui	Oui	oui	Bonnes pratiques
Masculin	Petits business	Primaire	Musulman	Primaire	oui	Oui	oui	Bonnes pratiques
Masculin	Petits business	Primaire	Musulman	Primaire	oui	Non	non	Mauvaises pratiques
Masculin	Petits business	Secondaire	Chretien	Secondaire	oui	Non	oui	Bonnes pratiques
Masculin	fonctionnaire	Secondaire	Chretien	Secondaire	oui	Non	oui	Bonnes pratiques
Masculin	Petits business	Secondaire	Chretien	Secondaire	oui	Non	oui	Bonnes pratiques
Masculin	Petits business	Secondaire	Chretien	Secondaire	oui	Non	oui	Bonnes pratiques
Masculin	Petits business	Secondaire	Chretien	Secondaire	oui	Non	non	Mauvaises pratiques
Masculin	Petits business	Secondaire	Paien	Secondaire	oui	Oui	oui	Bonnes pratiques
Masculin	Petits business	Secondaire	Chretien	Secondaire	oui	Non	oui	Bonnes pratiques
Masculin	Petits business	Secondaire	Chretien	Secondaire	oui	Non	oui	Bonnes pratiques
Masculin	Petits business	Primaire	Chretien	Secondaire	oui	Non	oui	Bonnes pratiques
Masculin	Agriculteur	Secondaire	Chretien	Secondaire	oui	Oui	oui	Bonnes pratiques
Masculin	Agriculteur	Secondaire	Chretien	Secondaire	oui	Oui	oui	Bonnes pratiques
Masculin	Agriculteur	Secondaire	Chretien	Secondaire	oui	Oui	oui	Bonnes pratiques
Féminin	Agriculteur	Secondaire	Chretien	Secondaire	oui	Oui	oui	Bonnes pratiques
Masculin	Petits business	Secondaire	Chretien	Secondaire	oui	Non	oui	Bonnes pratiques
Masculin	fonctionnaire	Université	Chretien	Universté	oui	Non	oui	Bonnes pratiques
Masculin	Petits business	Secondaire	Chretien	Secondaire	oui	Non	oui	Bonnes pratiques
Masculin	Petits business	Secondaire	Musulman	Secondaire	oui	Oui	oui	Bonnes pratiques
Masculin	Agriculteur	Sans niveau	Chretien	Sans niveau	oui	Non	non	Mauvaises pratiques
Masculin	Petits business	Secondaire	Chretien	Secondaire	oui	Oui	oui	Bonnes pratiques
Masculin	Petits business	Secondaire	Chretien	Secondaire	oui	Oui	oui	Bonnes pratiques
Masculin	fonctionnaire	Secondaire		Secondaire	oui	Non	oui	Bonnes pratiques
Masculin	Agriculteur	Primaire	Chretien	Secondaire	oui	Oui	oui	Bonnes pratiques
Masculin	Agriculteur	Primaire	Chretien	Primaire	oui	Oui	oui	Bonnes pratiques
Masculin	Petits business	Université	Chretien	Universté	oui	Oui	oui	Bonnes pratiques
Masculin	Agriculteur	Primaire	Chretien	Secondaire	oui	Non	non	Mauvaises pratiques
Masculin	fonctionnaire	Secondaire	Chretien	Secondaire	oui	Non	non	Mauvaises pratiques
Féminin	Petits business	Université	Chretien	Universté	oui	Oui	oui	Bonnes pratiques
Masculin	Petits business	Secondaire	Chretien	Secondaire	oui	Oui	oui	Bonnes pratiques
Masculin	fonctionnaire	Université	Chretien	Universté	oui	Oui	oui	Bonnes pratiques
Masculin	Petits business	Secondaire	Chretien	Secondaire	oui	Oui	oui	Bonnes pratiques
Féminin	Petits business	Secondaire	Chretien	Secondaire	oui	Oui	non	Mauvaises pratiques
Féminin	Petits business	Secondaire	Chretien	Secondaire	oui	Oui	oui	Bonnes pratiques
Masculin	Petits business	Secondaire	Chretien	Universté	oui	Oui	oui	Bonnes pratiques
Masculin	Petits business	Primaire	Chretien	Primaire	oui	Oui	oui	Bonnes pratiques
Masculin	Agriculteur	Secondaire	Chretien	Secondaire	oui	Oui	oui	Bonnes pratiques
Féminin	Petits business	Primaire	Chretien	Primaire	oui	Oui	oui	Bonnes pratiques
Féminin	student	Secondaire	Chretien	Secondaire	oui	Oui	oui	Bonnes pratiques
Masculin	fonctionnaire	Université	Musulman	Universté	oui	Oui	oui	Bonnes pratiques
Féminin	Agriculteur	Secondaire	Chretien	Secondaire	oui	Oui	oui	Bonnes pratiques
Masculin	Petits business	Secondaire	Chretien	Secondaire	oui	Oui	oui	Bonnes pratiques
Masculin	Petits business	Secondaire	Chretien	Secondaire	oui	Oui	oui	Bonnes pratiques
Masculin	Agriculteur	Secondaire	Chretien	Secondaire	oui	Oui	oui	Bonnes pratiques
Féminin	Petits business	Primaire	Chretien	Primaire	oui	Non	oui	Bonnes pratiques
Féminin	Petits business	Secondaire	Chretien	Secondaire	oui	Oui	oui	Bonnes pratiques
Masculin	fonctionnaire	Secondaire	Chretien	Secondaire	oui	Oui	oui	Bonnes pratiques
Masculin	fonctionnaire	Université	Chretien	Secondaire	oui	Oui	oui	Bonnes pratiques
Masculin	Agriculteur	Primaire	Chretien	Primaire	oui	Oui	oui	Bonnes pratiques
Masculin	fonctionnaire	Secondaire	Chretien	Secondaire	oui	Oui	oui	Bonnes pratiques
Masculin	Petits business	Secondaire		Secondaire	oui	Oui	oui	Bonnes pratiques
Masculin	Petits business	Secondaire	Chretien	Secondaire	oui	Non	oui	Bonnes pratiques
Masculin	fonctionnaire	Secondaire	Chretien	Secondaire	oui	Non	oui	Bonnes pratiques
Masculin	Petits business	Secondaire	Chretien	Secondaire	oui	Non	oui	Bonnes pratiques
Masculin	Petits business	Secondaire	Chretien	Secondaire	oui	Oui	oui	Bonnes pratiques
Féminin	Petits business	Secondaire	Chretien	Secondaire	non	Non	non	Mauvaises pratiques
Féminin	Petits business	Secondaire	Chretien	Secondaire	oui	Non	non	Mauvaises pratiques
Masculin	Petits business	Université	Musulman	Secondaire	oui	Oui	oui	Bonnes pratiques
Masculin	Agriculteur	Secondaire	Chretien	Secondaire	oui	Non	oui	Bonnes pratiques
Féminin	Petits business	Sans niveau	Chretien	Secondaire	oui	Non	oui	Bonnes pratiques
Masculin	fonctionnaire	Université	Chretien	Universté	oui	Oui	oui	Bonnes pratiques
Masculin	Agriculteur	Secondaire	Chretien	Secondaire	oui	Non	oui	Bonnes pratiques
Féminin	Petits business	Secondaire	Chretien	Secondaire	oui	Non	oui	Bonnes pratiques
Masculin	Petits business	Secondaire		Secondaire	oui	Non	oui	Bonnes pratiques
Masculin	Petits business	Université	Chretien	Universté	oui	Oui	oui	Bonnes pratiques
Masculin	Petits business	Secondaire	Chretien	Secondaire	oui	Non	oui	Bonnes pratiques
Masculin	Petits business	Secondaire	Chretien	Secondaire	non	Non	non	Mauvaises pratiques
Masculin	Agriculteur	Primaire	Chretien	Primaire	oui	Non	oui	Bonnes pratiques
Masculin	Petits business	Sans niveau	Chretien	Secondaire	non	Non	non	Mauvaises pratiques
Féminin	Ménagère	Secondaire	Chretien	Secondaire	oui	Non	oui	Bonnes pratiques
Masculin	Petits business	Sans niveau	Musulman	Sans niveau	oui	Non	oui	Bonnes pratiques
Masculin	Petits business	Secondaire	Chretien	Secondaire	oui	Oui	oui	Bonnes pratiques
Masculin	Agriculteur	Secondaire	Chretien	Secondaire	oui	Non	oui	Bonnes pratiques
Masculin	Agriculteur	Sans niveau	Chretien	Sans niveau	oui	Non	oui	Bonnes pratiques
Masculin	Agriculteur	Sans niveau	Chretien	Secondaire	oui	Non	oui	Bonnes pratiques
Masculin	fonctionnaire	Université	Chretien	Universté	oui	Non	oui	Bonnes pratiques
Masculin	Petits business	Secondaire	Chretien	Secondaire	oui	Non	oui	Bonnes pratiques
Masculin	Petits business	Université	Chretien	Universté	oui	Oui	oui	Bonnes pratiques
Masculin	Petits business	Secondaire	Chretien	Secondaire	oui	Oui	non	Mauvaises pratiques
Féminin	Petits business	Secondaire	Chretien	Secondaire	oui	Oui	oui	Bonnes pratiques
Masculin	Petits business	Secondaire	Chretien	Secondaire	oui	Oui	non	Mauvaises pratiques
Féminin	Petits business	Secondaire	Chretien	Secondaire	oui	Oui	oui	Bonnes pratiques
Masculin	Agriculteur	Secondaire	Chretien	Secondaire	oui	Non	oui	Bonnes pratiques
Masculin	Agriculteur	Secondaire	Chretien	Secondaire	oui	Non	oui	Bonnes pratiques
Masculin	Petits business	Secondaire	Chretien	Secondaire	oui	Non	oui	Bonnes pratiques
Masculin	Agriculteur	Secondaire	Chretien	Secondaire	oui	Non	oui	Bonnes pratiques
Féminin	fonctionnaire	Secondaire	Chretien	Secondaire	oui	Oui	oui	Bonnes pratiques
Masculin	Agriculteur	Primaire	Chretien	Primaire	oui	Oui	oui	Bonnes pratiques
Féminin	Ménagère	Primaire	Chretien	Secondaire	oui	Non	non	Mauvaises pratiques
Masculin	Agriculteur	Secondaire	Chretien	Secondaire	oui	Oui	non	Mauvaises pratiques
Féminin	Agriculteur	Primaire	Chretien	Primaire	oui	Non	oui	Bonnes pratiques
Masculin	Petits business	Université	Chretien	Secondaire	oui	Non	oui	Bonnes pratiques
Féminin	Petits business	Sans niveau	Chretien	Sans niveau	oui	Oui	oui	Bonnes pratiques
Féminin	Petits business	Secondaire	Chretien	Secondaire	oui	Non	non	Mauvaises pratiques
Féminin	Petits business	Primaire	Musulman	Primaire	oui	Non	oui	Bonnes pratiques
Féminin	Petits business	Secondaire	Chretien	Secondaire	oui	Oui	oui	Bonnes pratiques
Masculin	Agriculteur	Secondaire	Chretien	Secondaire	oui	Oui	oui	Bonnes pratiques
Masculin	Petits business	Primaire	Chretien	Primaire	oui	Non	oui	Bonnes pratiques
Féminin	Ménagère	Secondaire	Chretien	Secondaire	oui	Non	non	Mauvaises pratiques
Masculin	Petits business	Primaire	Chretien	Primaire	oui	Non	oui	Bonnes pratiques
Féminin	Ménagère	Primaire	Chretien	Primaire	oui	Non	non	Mauvaises pratiques
Masculin	Petits business	Sans niveau	Chretien	Sans niveau	non	Non	non	Mauvaises pratiques
Masculin	Petits business	Primaire	Paien	Primaire	oui	Non	non	Mauvaises pratiques
Masculin	student	Secondaire	Chretien	Secondaire	oui	Non	oui	Bonnes pratiques
Masculin	Agriculteur	Secondaire	Chretien	Secondaire	non	Non	non	Mauvaises pratiques
Féminin	Ménagère	Secondaire	Chretien	Secondaire	oui	Non	non	Mauvaises pratiques
Féminin	Ménagère	Secondaire	Chretien	Secondaire	oui	Non	oui	Bonnes pratiques
Féminin	Ménagère	Université	Chretien	Universté	oui	Oui	non	Mauvaises pratiques
Masculin	Agriculteur	Secondaire	Chretien	Secondaire	non	Non	non	Mauvaises pratiques
Féminin	Petits business	Secondaire	Chretien	Secondaire	oui	Non	oui	Bonnes pratiques
Masculin	Agriculteur	Primaire	Chretien	Primaire	oui	Non	oui	Bonnes pratiques
Masculin	Agriculteur	Secondaire	Chretien	Secondaire	oui	Non	oui	Bonnes pratiques
Masculin	Petits business	Université	Chretien	Universté	oui	Oui	oui	Bonnes pratiques
Féminin	Petits business	Université	Chretien	Universté	oui	Oui	oui	Bonnes pratiques
Féminin	Petits business	Primaire	Chretien	Secondaire	oui	Non	oui	Bonnes pratiques
Féminin	Agriculteur	Primaire	Chretien	Primaire	oui	Oui	oui	Bonnes pratiques
Masculin	Agriculteur	Secondaire	Chretien	Secondaire	oui	Non	oui	Bonnes pratiques
Masculin	Petits business	Secondaire	Musulman	Secondaire	oui	Non	oui	Bonnes pratiques
Masculin	Agriculteur	Université	Chretien	Universté	oui	Oui	oui	Bonnes pratiques
Masculin	fonctionnaire	Secondaire	Chretien	Secondaire	oui	Non	oui	Bonnes pratiques
Féminin	Petits business	Sans niveau	Chretien	Secondaire	oui	Oui	non	Mauvaises pratiques
Masculin	Petits business	Secondaire	Chretien	Secondaire	oui	Oui	non	Mauvaises pratiques
Masculin	fonctionnaire	Secondaire	Chretien	Secondaire	oui	Non	oui	Bonnes pratiques
Masculin	Petits business	Secondaire	Chretien	Secondaire	non	Non	non	Mauvaises pratiques
Féminin	Petits business	Primaire	Chretien	Primaire	oui	Non	oui	Bonnes pratiques
Masculin	fonctionnaire	Secondaire	Chretien	Secondaire	non	Non	non	Mauvaises pratiques
Masculin	Agriculteur	Secondaire	Chretien	Secondaire	oui	Non	oui	Bonnes pratiques
Féminin	Petits business	Primaire	Chretien	Primaire	oui	Oui	oui	Bonnes pratiques
Masculin	Agriculteur	Primaire	Chretien	Secondaire	oui	Non	oui	Bonnes pratiques
Féminin	Petits business	Secondaire	Chretien	Secondaire	oui	Oui	oui	Bonnes pratiques
Masculin	Agriculteur	Secondaire	Chretien	Secondaire	non	Non	non	Mauvaises pratiques
Masculin	Petits business	Secondaire	Chretien	Universté	oui	Non	oui	Bonnes pratiques
Masculin	Agriculteur	Secondaire	Chretien	Secondaire	non	Non	non	Mauvaises pratiques
Masculin	Agriculteur	Secondaire	Chretien	Secondaire	oui	Oui	non	Mauvaises pratiques
Masculin	Agriculteur	Secondaire	Chretien	Secondaire	oui	Non	oui	Bonnes pratiques
Féminin	fonctionnaire	Université	Chretien	Secondaire	oui	Non	non	Mauvaises pratiques
Masculin	Petits business	Secondaire	Chretien	Secondaire	oui	Non	oui	Bonnes pratiques
Masculin	Petits business	Secondaire	Chretien	Secondaire	oui	Non	oui	Bonnes pratiques
Masculin	Agriculteur	Secondaire	Chretien	Secondaire	oui	Non	oui	Bonnes pratiques
Féminin	Petits business	Secondaire	Chretien	Universté	oui	Oui	oui	Bonnes pratiques
Masculin	Petits business	Secondaire	Chretien	Secondaire	oui	Non	oui	Bonnes pratiques
Masculin	Petits business	Secondaire	Chretien	Secondaire	oui	Oui	oui	Bonnes pratiques
Féminin	Petits business	Secondaire	Chretien	Secondaire	oui	Oui	non	Mauvaises pratiques
Féminin	Petits business	Primaire	Chretien	Primaire	oui	Oui	oui	Bonnes pratiques
Féminin	Ménagère	Secondaire	Chretien	Secondaire	oui	Non	oui	Bonnes pratiques
Masculin	Petits business	Secondaire	Chretien	Secondaire	oui	Oui	oui	Bonnes pratiques
Masculin	student	Université	Chretien	Universté	oui	Oui	oui	Bonnes pratiques
Masculin	Agriculteur	Secondaire	Chretien	Secondaire	oui	Oui	non	Mauvaises pratiques
Féminin	fonctionnaire	Secondaire	Chretien	Secondaire	oui	Non	oui	Bonnes pratiques
Féminin	Petits business	Primaire	Chretien	Secondaire	oui	Non	non	Mauvaises pratiques
Masculin	Agriculteur	Université	Chretien	Secondaire	oui	Oui	non	Mauvaises pratiques
Masculin	fonctionnaire	Secondaire	Chretien	Secondaire	oui	Oui	oui	Bonnes pratiques
Féminin	Ménagère	Secondaire	Chretien	Secondaire	oui	Non	oui	Bonnes pratiques
Masculin	Petits business	Secondaire	Chretien	Secondaire	oui	Oui	oui	Bonnes pratiques
Masculin	Agriculteur	Université	Chretien	Universté	oui	Oui	oui	Bonnes pratiques
Masculin	Petits business	Secondaire	Chretien	Secondaire	oui	Non	oui	Bonnes pratiques
Masculin	Agriculteur	Secondaire	Chretien	Secondaire	oui	Oui	oui	Bonnes pratiques
Masculin	Agriculteur	Primaire	Chretien	Primaire	oui	Oui	oui	Bonnes pratiques
Masculin	Ménagère	Primaire	Chretien	Primaire	oui	Oui	oui	Bonnes pratiques
Masculin	Petits business	Secondaire	Chretien	Secondaire	oui	Non	non	Mauvaises pratiques
Masculin	fonctionnaire	Université	Chretien	Universté	oui	Oui	oui	Bonnes pratiques
Masculin	Petits business	Secondaire	Chretien	Universté	oui	Non	oui	Bonnes pratiques
Masculin	Agriculteur	Primaire		Primaire	non	Non	non	Mauvaises pratiques
Masculin	Agriculteur	Secondaire	Chretien	Secondaire	oui	Non	oui	Bonnes pratiques
Féminin	Petits business	Secondaire	Chretien	Secondaire	non	Non	non	Mauvaises pratiques
Masculin	Petits business	Secondaire	Chretien	Secondaire	oui	Non	oui	Bonnes pratiques
Masculin	Agriculteur	Secondaire	Chretien	Secondaire	oui	Oui	oui	Bonnes pratiques
Masculin	Agriculteur	Secondaire	Chretien	Secondaire	oui	Non	non	Mauvaises pratiques
Masculin	Petits business	Primaire	Musulman	Primaire	oui	Non	oui	Bonnes pratiques
Masculin	Agriculteur	Primaire	Chretien	Primaire	non	Non	non	Mauvaises pratiques
Masculin	Agriculteur	Secondaire	Chretien	Secondaire	oui	Oui	oui	Bonnes pratiques
Féminin	Agriculteur	Secondaire	Chretien	Secondaire	oui	Non	oui	Bonnes pratiques
Masculin	Agriculteur	Primaire	Chretien	Primaire	oui	Non	oui	Bonnes pratiques
Masculin	Agriculteur	Secondaire	Chretien	Secondaire	oui	Non	oui	Bonnes pratiques
Féminin	Petits business	Primaire	Chretien	Primaire	oui	Oui	oui	Bonnes pratiques
Masculin	Agriculteur	Primaire	Paien	Primaire	oui	Non	oui	Bonnes pratiques
Féminin	Agriculteur	Primaire	Chretien	Primaire	oui	Oui	oui	Bonnes pratiques
Masculin	Agriculteur	Primaire	Chretien	Primaire	oui	Non	oui	Bonnes pratiques
Féminin	Agriculteur	Secondaire	Chretien	Secondaire	oui	Non	oui	Bonnes pratiques
Masculin	Petits business	Secondaire	Chretien	Secondaire	oui	Non	oui	Bonnes pratiques
Masculin	Agriculteur	Secondaire	Chretien	Secondaire	oui	Oui	oui	Bonnes pratiques
Masculin	Agriculteur	Secondaire	Chretien	Secondaire	oui	Oui	oui	Bonnes pratiques
Féminin	Agriculteur	Secondaire	Chretien	Secondaire	oui	Non	oui	Bonnes pratiques
Féminin	Agriculteur	Primaire	Chretien	Primaire	oui	Oui	non	Mauvaises pratiques
Masculin	fonctionnaire	Université	Chretien	Universté	non	Non	non	Mauvaises pratiques
Masculin	Agriculteur	Secondaire	Chretien	Secondaire	oui	Oui	oui	Bonnes pratiques
Masculin	Petits business	Secondaire	Chretien	Secondaire	oui	Non	oui	Bonnes pratiques
Masculin	Agriculteur	Primaire	Chretien	Primaire	oui	Oui	oui	Bonnes pratiques
Masculin	Agriculteur	Secondaire	Chretien	Secondaire	oui	Non	non	Mauvaises pratiques
Masculin	Petits business	Primaire	Chretien	Primaire	non	Non	non	Mauvaises pratiques
Masculin	Petits business	Primaire	Chretien	Primaire	non	Non	non	Mauvaises pratiques
Féminin	Petits business	Primaire	Chretien	Primaire	oui	Non	oui	Bonnes pratiques
Masculin	Agriculteur	Primaire	Chretien	Primaire	oui	Non	non	Mauvaises pratiques
Masculin	Petits business	Secondaire	Chretien	Secondaire	oui	Oui	oui	Bonnes pratiques
Féminin	fonctionnaire	Secondaire	Chretien	Secondaire	oui	Oui	oui	Bonnes pratiques
Masculin	fonctionnaire	Secondaire	Chretien	Secondaire	oui	Non	oui	Bonnes pratiques
Masculin	fonctionnaire	Université	Chretien	Universté	oui	Oui	oui	Bonnes pratiques
Masculin	Agriculteur	Université	Chretien	Secondaire	non	Non	non	Mauvaises pratiques
Masculin	Petits business	Secondaire	Chretien	Secondaire	oui	Non	non	Mauvaises pratiques
Masculin	Petits business	Primaire	Musulman	Primaire	oui	Non	non	Mauvaises pratiques
Masculin	Petits business	Primaire	Musulman	Primaire	non	Non	non	Mauvaises pratiques
Masculin	Petits business	Secondaire	Chretien	Secondaire	oui	Non	oui	Bonnes pratiques
Masculin	Petits business	Secondaire	Chretien	Secondaire	non	Non	non	Mauvaises pratiques
Masculin	fonctionnaire	Université	Chretien	Universté	oui	Non	non	Mauvaises pratiques
Féminin	Ménagère	Primaire	Chretien	Primaire	oui	Oui	oui	Bonnes pratiques
Féminin	Ménagère	Secondaire	Chretien	Universté	oui	Oui	oui	Bonnes pratiques
Masculin	Agriculteur	Secondaire	Chretien	Secondaire	oui	Non	oui	Bonnes pratiques
Masculin	Ménagère	Secondaire	Paien	Secondaire	oui	Oui	oui	Bonnes pratiques
Féminin	fonctionnaire	Secondaire	Chretien	Secondaire	oui	Non	oui	Bonnes pratiques
Masculin	Agriculteur	Secondaire	Chretien	Secondaire	non	Non	non	Mauvaises pratiques
Masculin	Petits business	Secondaire	Chretien	Secondaire	oui	Non	oui	Bonnes pratiques
Féminin	Petits business	Secondaire	Chretien	Secondaire	oui	Oui	oui	Bonnes pratiques
Féminin	Agriculteur	Secondaire	Chretien	Secondaire	oui	Oui	non	Mauvaises pratiques
Masculin	Petits business	Secondaire	Chretien	Secondaire	oui	Oui	oui	Bonnes pratiques
Masculin	Petits business	Secondaire	Chretien	Secondaire	oui	Oui	oui	Bonnes pratiques
Masculin	fonctionnaire	Secondaire	Chretien	Secondaire	oui	Oui	oui	Bonnes pratiques
Féminin	fonctionnaire	Université	Chretien	Universté	oui	Oui	oui	Bonnes pratiques
Masculin	Petits business	Secondaire	Chretien	Secondaire	oui	Oui	oui	Bonnes pratiques
Masculin	Agriculteur	Primaire	Chretien	Secondaire	oui	Non	non	Mauvaises pratiques
Féminin	Petits business	Secondaire	Chretien	Secondaire	oui	Oui	oui	Bonnes pratiques
Masculin	Agriculteur	Secondaire	Chretien	Universté	oui	Oui	oui	Bonnes pratiques
Féminin	Agriculteur	Primaire	Chretien	Secondaire	oui	Oui	oui	Bonnes pratiques
Masculin	fonctionnaire	Secondaire	Chretien	Secondaire	non	Oui	non	Mauvaises pratiques
Féminin	Ménagère	Secondaire	Chretien	Secondaire	oui	Non	oui	Bonnes pratiques
Masculin	Agriculteur	Secondaire	Chretien	Secondaire	oui	Non	non	Mauvaises pratiques
Masculin	Agriculteur	Primaire	Chretien	Universté	oui	Non	non	Mauvaises pratiques
Masculin	Petits business	Secondaire	Chretien	Secondaire	oui	Non	oui	Bonnes pratiques
Féminin	Petits business	Secondaire	Chretien	Secondaire	oui	Non	oui	Bonnes pratiques
Masculin	Petits business	Université	Chretien	Universté	oui	Oui	oui	Bonnes pratiques
Féminin	fonctionnaire	Secondaire	Chretien	Secondaire	oui	Oui	oui	Bonnes pratiques
Masculin	Agriculteur	Primaire	Chretien	Universté	oui	Non	non	Mauvaises pratiques
Masculin	Agriculteur	Secondaire	Chretien	Secondaire	oui	Oui	oui	Bonnes pratiques
Masculin	fonctionnaire	Université	Chretien	Secondaire	oui	Oui	non	Mauvaises pratiques
Féminin	Ménagère	Primaire	Chretien	Secondaire	oui	Non	oui	Bonnes pratiques
Féminin	Petits business	Secondaire	Chretien	Secondaire	oui	Non	oui	Bonnes pratiques
Masculin	Agriculteur	Secondaire	Chretien	Secondaire	oui	Non	oui	Bonnes pratiques
Féminin	Ménagère	Secondaire	Chretien	Secondaire	oui	Oui	oui	Bonnes pratiques
Masculin	Petits business	Secondaire	Chretien	Secondaire	oui	Non	oui	Bonnes pratiques
Masculin	Agriculteur	Secondaire	Chretien	Secondaire	oui	Oui	non	Mauvaises pratiques
Masculin	Agriculteur	Primaire	Chretien	Primaire	oui	Non	oui	Bonnes pratiques
Masculin	fonctionnaire	Université	Chretien	Universté	oui	Non	oui	Bonnes pratiques
Masculin	fonctionnaire	Université	Chretien	Secondaire	oui	Oui	oui	Bonnes pratiques
Féminin	Ménagère	Primaire	Chretien	Secondaire	oui	Oui	oui	Bonnes pratiques
Féminin	Petits business	Secondaire	Chretien	Secondaire	non	Non	non	Mauvaises pratiques
Masculin	fonctionnaire	Secondaire	Chretien	Secondaire	oui	Non	non	Mauvaises pratiques
Féminin	fonctionnaire	Secondaire	Chretien	Secondaire	oui	Non	non	Mauvaises pratiques
Féminin	Ménagère	Secondaire	Chretien	Secondaire	oui	Oui	oui	Bonnes pratiques
Féminin	Petits business	Secondaire	Chretien	Secondaire	oui	Oui	oui	Bonnes pratiques
Masculin	fonctionnaire	Université	Chretien	Universté	oui	Non	non	Mauvaises pratiques
Masculin	Petits business	Secondaire	Chretien	Secondaire	oui	Non	oui	Bonnes pratiques
Masculin	Petits business	Secondaire	Chretien	Secondaire	oui	Non	oui	Bonnes pratiques
Masculin	Petits business	Primaire	Chretien	Secondaire	oui	Non	oui	Bonnes pratiques
Masculin	fonctionnaire	Secondaire	Chretien	Secondaire	oui	Non	non	Mauvaises pratiques

## Sheet: Attitudes vis-à-vis du Palu
Sexe du CM	Proféssion du CM	Niveau d'étude CM	Réligion du CM	Niveau d'étude du répondant	Gestion du Paludisme	Attitude vis-à-vis du Palu
Féminin	Petits business	Secondaire	Chretien	Secondaire	Automédication	Mauvaise attitude
Masculin	Agriculteur	Secondaire	Musulman	Secondaire	Hopital	Bonne attitude
Masculin	Petits business	Primaire	Chretien	Sans niveau	Automédication	Mauvaise attitude
Féminin	Petits business	Secondaire	Chretien	Secondaire	Hopital	Bonne attitude
Masculin	fonctionnaire	Secondaire	Chretien	Secondaire	Hopital	Bonne attitude
Masculin	Agriculteur	Université	Chretien	Universté	Automédication	Mauvaise attitude
Féminin	Ménagère	Secondaire	Chretien	Secondaire	Automédication	Mauvaise attitude
Masculin	Agriculteur	Secondaire	Chretien	Secondaire	Hopital	Bonne attitude
Féminin	Ménagère	Primaire	Chretien	Secondaire	Hopital	Bonne attitude
Masculin	Agriculteur	Primaire	Chretien	Secondaire	Hopital	Bonne attitude
Masculin	Agriculteur	Université	Chretien	Universté	Hopital	Bonne attitude
Masculin	Agriculteur	Secondaire	Chretien	Secondaire	Pharmacopé	Mauvaise attitude
Féminin	Ménagère	Secondaire	Chretien	Secondaire	Hopital	Bonne attitude
Féminin	Ménagère	Secondaire	Chretien	Primaire	Hopital	Bonne attitude
Féminin	Petits business	Secondaire	Chretien	Secondaire	Hopital	Bonne attitude
Féminin	Petits business	Université	Chretien	Universté	Pharmacopé	Mauvaise attitude
Masculin	Agriculteur	Secondaire	Paien	Secondaire	Pharmacopé	Mauvaise attitude
Masculin	Petits business	Secondaire	Chretien	Secondaire	Pharmacopé	Mauvaise attitude
Masculin	Petits business	Secondaire	Chretien	Secondaire	Pharmacopé	Mauvaise attitude
Masculin	student	Secondaire	Chretien	Secondaire	Hopital	Bonne attitude
Masculin	Agriculteur	Primaire	Chretien	Primaire	Pharmacopé	Mauvaise attitude
Féminin	Ménagère	Secondaire	Chretien	Secondaire	Pharmacopé	Mauvaise attitude
Masculin	Agriculteur	Université	Chretien	Secondaire	Hopital	Bonne attitude
Masculin	Agriculteur	Secondaire	Chretien	Secondaire	Hopital	Bonne attitude
Féminin	Ménagère	Primaire	Chretien	Secondaire	Pharmacopé	Mauvaise attitude
Féminin	Ménagère	Secondaire	Chretien	Secondaire	Pharmacopé	Mauvaise attitude
Féminin	fonctionnaire	Université	Chretien	Secondaire	Pharmacopé	Mauvaise attitude
Masculin	Agriculteur	Secondaire	Chretien	Secondaire	Pharmacopé	Mauvaise attitude
Masculin	Agriculteur	Secondaire	Chretien	Secondaire	Pharmacopé	Mauvaise attitude
Féminin	Petits business	Secondaire	Chretien	Secondaire	Automédication	Mauvaise attitude
Masculin	Agriculteur	Secondaire	Chretien	Secondaire	Hopital	Bonne attitude
Masculin	Agriculteur	Secondaire	Chretien	Secondaire	Hopital	Bonne attitude
Masculin	student	Secondaire	Chretien	Secondaire	Hopital	Bonne attitude
Masculin	Agriculteur	Secondaire	Chretien	Secondaire	Automédication	Mauvaise attitude
Masculin	Agriculteur	Primaire	Chretien	Secondaire	Hopital	Bonne attitude
Féminin	Agriculteur	Sans niveau	Paien	Sans niveau	Pharmacopé	Mauvaise attitude
Masculin	Petits business	Secondaire	Chretien	Secondaire	Automédication	Mauvaise attitude
Masculin	Petits business	Primaire	Paien	Primaire	Pharmacopé	Mauvaise attitude
Masculin	Agriculteur	Primaire	Chretien	Primaire	Automédication	Mauvaise attitude
Masculin	Petits business	Primaire	Musulman	Secondaire	Hopital	Bonne attitude
Masculin	fonctionnaire	Université	Chretien	Universté	Hopital	Bonne attitude
Masculin	Petits business	Secondaire	Chretien	Secondaire	Hopital	Bonne attitude
Masculin	fonctionnaire	Primaire	Chretien	Secondaire	Hopital	Bonne attitude
Masculin	Petits business	Secondaire	Chretien	Secondaire	Automédication	Mauvaise attitude
Masculin	Petits business	Primaire	Paien	Primaire	Hopital	Bonne attitude
Masculin	Petits business	Secondaire	Chretien	Secondaire	Hopital	Bonne attitude
Masculin	Petits business	Secondaire	Chretien	Secondaire	Hopital	Bonne attitude
Masculin	Agriculteur	Primaire	Chretien	Universté	Automédication	Mauvaise attitude
Masculin	Agriculteur	Secondaire	Chretien	Secondaire	Hopital	Bonne attitude
Masculin	Petits business	Secondaire	Chretien	Universté	Automédication	Mauvaise attitude
Masculin	student	Secondaire	Chretien	Secondaire	Hopital	Bonne attitude
Masculin	Petits business	Secondaire	Chretien	Secondaire	Hopital	Bonne attitude
Féminin	fonctionnaire	Université	Chretien	Universté	Hopital	Bonne attitude
Masculin	Agriculteur	Primaire	Chretien	Secondaire	Hopital	Bonne attitude
Féminin	Agriculteur	Secondaire	Chretien	Universté	Hopital	Bonne attitude
Masculin	Agriculteur	Primaire	Chretien	Secondaire	Hopital	Bonne attitude
Masculin	Agriculteur	Secondaire	Chretien	Secondaire	Pharmacopé	Mauvaise attitude
Féminin	Petits business	Secondaire	Chretien	Secondaire	Hopital	Bonne attitude
Masculin	Agriculteur	Secondaire	Chretien	Secondaire	Hopital	Bonne attitude
Masculin	Agriculteur	Université	Chretien	Secondaire	Hopital	Bonne attitude
Féminin	Petits business	Primaire	Musulman	Secondaire	Automédication	Mauvaise attitude
Féminin	Petits business	Secondaire	Chretien	Secondaire	Hopital	Bonne attitude
Féminin	Petits business	Secondaire	Chretien	Secondaire	Automédication	Mauvaise attitude
Féminin	Petits business	Primaire	Chretien	Primaire	Hopital	Bonne attitude
Masculin	Agriculteur	Secondaire	Chretien	Secondaire	Pharmacopé	Mauvaise attitude
Féminin	Petits business	Université	Chretien	Universté	Hopital	Bonne attitude
Masculin	fonctionnaire	Université	Chretien	Universté	Automédication	Mauvaise attitude
Masculin	fonctionnaire	Primaire	Chretien	Primaire	Hopital	Bonne attitude
Masculin	fonctionnaire	Université	Chretien	Universté	Hopital	Bonne attitude
Masculin	Petits business	Secondaire	Chretien	Secondaire	Hopital	Bonne attitude
Masculin	Petits business	Secondaire	Chretien	Secondaire	Hopital	Bonne attitude
Masculin	Agriculteur	Secondaire	Musulman	Secondaire	Pharmacopé	Mauvaise attitude
Masculin	Petits business	Secondaire	Chretien	Secondaire	Hopital	Bonne attitude
Masculin	Petits business	Primaire	Chretien	Primaire	Pharmacopé	Mauvaise attitude
Masculin	Petits business	Secondaire	Chretien	Secondaire	Pharmacopé	Mauvaise attitude
Masculin	Petits business	Secondaire	Chretien	Universté	Hopital	Bonne attitude
Masculin	Agriculteur	Secondaire	Chretien	Secondaire	Automédication	Mauvaise attitude
Féminin	Agriculteur	Primaire	Chretien	Primaire	Hopital	Bonne attitude
Masculin	student	Secondaire	Chretien	Secondaire	Pharmacopé	Mauvaise attitude
Masculin	fonctionnaire	Université	Chretien	Primaire	Hopital	Bonne attitude
Masculin	fonctionnaire	Université	Chretien	Universté	Automédication	Mauvaise attitude
Masculin	Agriculteur	Sans niveau	Chretien	Secondaire	Automédication	Mauvaise attitude
Féminin	Ménagère	Secondaire	Chretien	Secondaire	Automédication	Mauvaise attitude
Féminin	Agriculteur	Primaire	Chretien	Primaire	Automédication	Mauvaise attitude
Masculin	Petits business	Secondaire	Musulman	Secondaire	Hopital	Bonne attitude
Masculin	Agriculteur	Secondaire	Chretien	Secondaire	Automédication	Mauvaise attitude
Masculin	Agriculteur	Primaire	Chretien	Primaire	Hopital	Bonne attitude
Masculin	Petits business	Secondaire	Chretien	Secondaire	Pharmacopé	Mauvaise attitude
Féminin	Ménagère	Secondaire	Chretien	Secondaire	Automédication	Mauvaise attitude
Masculin	Petits business	Secondaire	Chretien	Secondaire	Automédication	Mauvaise attitude
Féminin	fonctionnaire	Secondaire	Chretien	Secondaire	Hopital	Bonne attitude
Masculin	Petits business	Secondaire	Chretien	Secondaire	Automédication	Mauvaise attitude
Masculin	Agriculteur	Secondaire	Chretien	Secondaire	Automédication	Mauvaise attitude
Féminin	Ménagère	Primaire	Chretien	Primaire	Pharmacopé	Mauvaise attitude
Masculin	Petits business	Université	Chretien	Universté	Pharmacopé	Mauvaise attitude
Féminin	Petits business	Secondaire	Chretien	Secondaire	Automédication	Mauvaise attitude
Féminin	Agriculteur	Primaire	Chretien	Primaire	Pharmacopé	Mauvaise attitude
Masculin	Agriculteur	Primaire	Chretien	Primaire	Hopital	Bonne attitude
Masculin	Agriculteur	Primaire	Chretien	Primaire	Pharmacopé	Mauvaise attitude
Masculin	Agriculteur	Secondaire	Chretien	Universté	Hopital	Bonne attitude
Masculin	Agriculteur	Primaire	Chretien	Secondaire	Hopital	Bonne attitude
Masculin	Agriculteur	Primaire	Chretien	Primaire	Hopital	Bonne attitude
Féminin	Petits business	Secondaire	Chretien	Secondaire	Automédication	Mauvaise attitude
Masculin	Agriculteur	Secondaire	Chretien	Secondaire	Hopital	Bonne attitude
Féminin	Ménagère	Sans niveau	Chretien	Universté	Automédication	Mauvaise attitude
Masculin	Petits business	Secondaire	Musulman	Secondaire	Automédication	Mauvaise attitude
Masculin	Agriculteur	Secondaire	Chretien	Secondaire	Hopital	Bonne attitude
Masculin	Agriculteur	Primaire	Chretien	Secondaire	Automédication	Mauvaise attitude
Féminin	Agriculteur	Secondaire	Chretien	Secondaire	Hopital	Bonne attitude
Féminin	fonctionnaire	Secondaire	Musulman	Universté	Automédication	Mauvaise attitude
Masculin	Agriculteur	Primaire	Chretien	Secondaire	Automédication	Mauvaise attitude
Masculin	Petits business	Secondaire	Chretien	Secondaire	Hopital	Bonne attitude
Masculin	Agriculteur	Primaire	Chretien	Primaire	Hopital	Bonne attitude
Féminin	fonctionnaire	Secondaire	Chretien	Secondaire	Hopital	Bonne attitude
Masculin	Agriculteur	Secondaire	Chretien	Secondaire	Hopital	Bonne attitude
Masculin	Petits business	Primaire	Chretien	Secondaire	Automédication	Mauvaise attitude
Masculin	Agriculteur	Secondaire	Chretien	Secondaire	Hopital	Bonne attitude
Masculin	Agriculteur	Secondaire	Chretien	Secondaire	Pharmacopé	Mauvaise attitude
Masculin	Agriculteur	Primaire	Chretien	Secondaire	Automédication	Mauvaise attitude
Féminin	Petits business	Université	Chretien	Universté	Automédication	Mauvaise attitude
Masculin	student	Secondaire	Chretien	Secondaire	Hopital	Bonne attitude
Féminin	Ménagère	Primaire	Chretien	Universté	Automédication	Mauvaise attitude
Féminin	Agriculteur	Secondaire	Chretien	Secondaire	Hopital	Bonne attitude
Masculin	fonctionnaire	Secondaire	Chretien	Secondaire	Pharmacopé	Mauvaise attitude
Féminin	Petits business	Primaire	Chretien	Secondaire	Hopital	Bonne attitude
Masculin	Petits business	Secondaire	Chretien	Secondaire	RAS
Masculin	Agriculteur	Secondaire	Chretien	Secondaire	Hopital	Bonne attitude
Féminin	fonctionnaire	Université	Chretien	Universté	RAS
Masculin	Petits business	Sans niveau	Musulman	Sans niveau	Pharmacopé	Mauvaise attitude
Féminin	fonctionnaire	Université	Chretien	Secondaire	Hopital	Bonne attitude
Féminin	Ménagère	Primaire	Chretien	Primaire	Pharmacopé	Mauvaise attitude
Masculin	Petits business	Université	Chretien	Universté	Pharmacopé	Mauvaise attitude
Masculin	Petits business	Université	Paien	Universté	Automédication	Mauvaise attitude
Masculin	Petits business	Secondaire	Chretien	Secondaire	Hopital	Bonne attitude
Masculin	Petits business	Secondaire	Chretien	Secondaire	Hopital	Bonne attitude
Masculin	Agriculteur	Primaire	Chretien	Primaire	Hopital	Bonne attitude
Masculin	Petits business	Secondaire	Chretien	Secondaire	Hopital	Bonne attitude
Masculin	Agriculteur	Primaire	Chretien	Primaire	Pharmacopé	Mauvaise attitude
Masculin	Petits business	Secondaire	Chretien	Secondaire	Hopital	Bonne attitude
Masculin	Petits business	Secondaire	Chretien	Secondaire	Hopital	Bonne attitude
Masculin	Petits business	Secondaire	Chretien	Universté	Hopital	Bonne attitude
Masculin	fonctionnaire	Secondaire	Chretien	Secondaire	Hopital	Bonne attitude
Masculin	Petits business	Secondaire	Chretien	Secondaire	Hopital	Bonne attitude
Masculin	Petits business	Secondaire	Chretien	Secondaire	Hopital	Bonne attitude
Féminin	Petits business	Secondaire	Chretien	Secondaire	Automédication	Mauvaise attitude
Féminin	fonctionnaire	Université	Chretien	Secondaire	Hopital	Bonne attitude
Féminin	Agriculteur	Université	Chretien	Secondaire	Pharmacopé	Mauvaise attitude
Féminin	Agriculteur	Secondaire	Chretien	Secondaire	Automédication	Mauvaise attitude
Masculin	fonctionnaire	Université	Chretien	Universté	Hopital	Bonne attitude
Masculin	Petits business	Université	Chretien	Universté	Hopital	Bonne attitude
Masculin	Petits business	Secondaire	Chretien	Secondaire	Hopital	Bonne attitude
Masculin	fonctionnaire	Université	Chretien	Universté	Pharmacopé	Mauvaise attitude
Masculin	fonctionnaire	Université	Paien	Secondaire	Hopital	Bonne attitude
Masculin	Petits business	Secondaire	Chretien	Secondaire	Pharmacopé	Mauvaise attitude
Masculin	fonctionnaire	Université	Musulman	Universté	Hopital	Bonne attitude
Féminin	fonctionnaire	Université	Chretien	Universté	Hopital	Bonne attitude
Masculin	Agriculteur	Secondaire	Chretien	Secondaire	Automédication	Mauvaise attitude
Féminin	Petits business	Primaire	Chretien	Primaire	Pharmacopé	Mauvaise attitude
Masculin	Agriculteur	Primaire	Chretien	Primaire	Pharmacopé	Mauvaise attitude
Masculin	Petits business	Primaire	Chretien	Primaire	Pharmacopé	Mauvaise attitude
Masculin	Petits business	Primaire	Musulman	Primaire	Pharmacopé	Mauvaise attitude
Masculin	Petits business	Primaire	Musulman	Primaire	Hopital	Bonne attitude
Masculin	Petits business	Secondaire	Chretien	Secondaire	Pharmacopé	Mauvaise attitude
Masculin	fonctionnaire	Secondaire	Chretien	Secondaire	Pharmacopé	Mauvaise attitude
Masculin	Petits business	Secondaire	Chretien	Secondaire	Hopital	Bonne attitude
Masculin	Petits business	Secondaire	Chretien	Secondaire	Pharmacopé	Mauvaise attitude
Masculin	Petits business	Secondaire	Chretien	Secondaire	Automédication	Mauvaise attitude
Masculin	Petits business	Secondaire	Paien	Secondaire	Automédication	Mauvaise attitude
Masculin	Petits business	Secondaire	Chretien	Secondaire	Automédication	Mauvaise attitude
Masculin	Petits business	Secondaire	Chretien	Secondaire	Automédication	Mauvaise attitude
Masculin	Petits business	Primaire	Chretien	Secondaire	Hopital	Bonne attitude
Masculin	Agriculteur	Secondaire	Chretien	Secondaire	Pharmacopé	Mauvaise attitude
Masculin	Agriculteur	Secondaire	Chretien	Secondaire	Automédication	Mauvaise attitude
Masculin	Agriculteur	Secondaire	Chretien	Secondaire	Automédication	Mauvaise attitude
Féminin	Agriculteur	Secondaire	Chretien	Secondaire	Hopital	Bonne attitude
Masculin	Petits business	Secondaire	Chretien	Secondaire	Hopital	Bonne attitude
Masculin	fonctionnaire	Université	Chretien	Universté	Hopital	Bonne attitude
Masculin	Petits business	Secondaire	Chretien	Secondaire	Pharmacopé	Mauvaise attitude
Masculin	Petits business	Secondaire	Musulman	Secondaire	Pharmacopé	Mauvaise attitude
Masculin	Agriculteur	Sans niveau	Chretien	Sans niveau	Hopital	Bonne attitude
Masculin	Petits business	Secondaire	Chretien	Secondaire	Hopital	Bonne attitude
Masculin	Petits business	Secondaire	Chretien	Secondaire	Pharmacopé	Mauvaise attitude
Masculin	fonctionnaire	Secondaire		Secondaire	Automédication	Mauvaise attitude
Masculin	Agriculteur	Primaire	Chretien	Secondaire	Hopital	Bonne attitude
Masculin	Agriculteur	Primaire	Chretien	Primaire	Hopital	Bonne attitude
Masculin	Petits business	Université	Chretien	Universté	Hopital	Bonne attitude
Masculin	Agriculteur	Primaire	Chretien	Secondaire	Hopital	Bonne attitude
Masculin	fonctionnaire	Secondaire	Chretien	Secondaire	RAS
Féminin	Petits business	Université	Chretien	Universté	Automédication	Mauvaise attitude
Masculin	Petits business	Secondaire	Chretien	Secondaire	Automédication	Mauvaise attitude
Masculin	fonctionnaire	Université	Chretien	Universté	Automédication	Mauvaise attitude
Masculin	Petits business	Secondaire	Chretien	Secondaire	Hopital	Bonne attitude
Féminin	Petits business	Secondaire	Chretien	Secondaire	Automédication	Mauvaise attitude
Féminin	Petits business	Secondaire	Chretien	Secondaire	Hopital	Bonne attitude
Masculin	Petits business	Secondaire	Chretien	Universté	Hopital	Bonne attitude
Masculin	Petits business	Primaire	Chretien	Primaire	Automédication	Mauvaise attitude
Masculin	Agriculteur	Secondaire	Chretien	Secondaire	Hopital	Bonne attitude
Féminin	Petits business	Primaire	Chretien	Primaire	Hopital	Bonne attitude
Féminin	student	Secondaire	Chretien	Secondaire	Hopital	Bonne attitude
Masculin	fonctionnaire	Université	Musulman	Universté	Hopital	Bonne attitude
Féminin	Agriculteur	Secondaire	Chretien	Secondaire	Hopital	Bonne attitude
Masculin	Petits business	Secondaire	Chretien	Secondaire	Automédication	Mauvaise attitude
Masculin	Petits business	Secondaire	Chretien	Secondaire	Hopital	Bonne attitude
Masculin	Agriculteur	Secondaire	Chretien	Secondaire	Hopital	Bonne attitude
Féminin	Petits business	Primaire	Chretien	Primaire	Automédication	Mauvaise attitude
Féminin	Petits business	Secondaire	Chretien	Secondaire	Hopital	Bonne attitude
Masculin	fonctionnaire	Secondaire	Chretien	Secondaire	Automédication	Mauvaise attitude
Masculin	fonctionnaire	Université	Chretien	Secondaire	Hopital	Bonne attitude
Masculin	Agriculteur	Primaire	Chretien	Primaire	Hopital	Bonne attitude
Masculin	fonctionnaire	Secondaire	Chretien	Secondaire	Automédication	Mauvaise attitude
Masculin	Petits business	Secondaire		Secondaire	Automédication	Mauvaise attitude
Masculin	Petits business	Secondaire	Chretien	Secondaire	Automédication	Mauvaise attitude
Masculin	fonctionnaire	Secondaire	Chretien	Secondaire	Hopital	Bonne attitude
Masculin	Petits business	Secondaire	Chretien	Secondaire	Pharmacopé	Mauvaise attitude
Masculin	Petits business	Secondaire	Chretien	Secondaire	Hopital	Bonne attitude
Féminin	Petits business	Secondaire	Chretien	Secondaire	Pharmacopé	Mauvaise attitude
Féminin	Petits business	Secondaire	Chretien	Secondaire	Hopital	Bonne attitude
Masculin	Petits business	Université	Musulman	Secondaire	Hopital	Bonne attitude
Masculin	Agriculteur	Secondaire	Chretien	Secondaire	Automédication	Mauvaise attitude
Féminin	Petits business	Sans niveau	Chretien	Secondaire	Pharmacopé	Mauvaise attitude
Masculin	fonctionnaire	Université	Chretien	Universté	Pharmacopé	Mauvaise attitude
Masculin	Agriculteur	Secondaire	Chretien	Secondaire	Hopital	Bonne attitude
Féminin	Petits business	Secondaire	Chretien	Secondaire	Hopital	Bonne attitude
Masculin	Petits business	Secondaire		Secondaire	Automédication	Mauvaise attitude
Masculin	Petits business	Université	Chretien	Universté	Automédication	Mauvaise attitude
Masculin	Petits business	Secondaire	Chretien	Secondaire	Automédication	Mauvaise attitude
Masculin	Petits business	Secondaire	Chretien	Secondaire	Hopital	Bonne attitude
Masculin	Agriculteur	Primaire	Chretien	Primaire	Pharmacopé	Mauvaise attitude
Masculin	Petits business	Sans niveau	Chretien	Secondaire	Pharmacopé	Mauvaise attitude
Féminin	Ménagère	Secondaire	Chretien	Secondaire	Automédication	Mauvaise attitude
Masculin	Petits business	Sans niveau	Musulman	Sans niveau	Automédication	Mauvaise attitude
Masculin	Petits business	Secondaire	Chretien	Secondaire	Automédication	Mauvaise attitude
Masculin	Agriculteur	Secondaire	Chretien	Secondaire	Automédication	Mauvaise attitude
Masculin	Agriculteur	Sans niveau	Chretien	Sans niveau	Automédication	Mauvaise attitude
Masculin	Agriculteur	Sans niveau	Chretien	Secondaire	Automédication	Mauvaise attitude
Masculin	fonctionnaire	Université	Chretien	Universté	Hopital	Bonne attitude
Masculin	Petits business	Secondaire	Chretien	Secondaire	Pharmacopé	Mauvaise attitude
Masculin	Petits business	Université	Chretien	Universté	Pharmacopé	Mauvaise attitude
Masculin	Petits business	Secondaire	Chretien	Secondaire	Pharmacopé	Mauvaise attitude
Féminin	Petits business	Secondaire	Chretien	Secondaire	Automédication	Mauvaise attitude
Masculin	Petits business	Secondaire	Chretien	Secondaire	Hopital	Bonne attitude
Féminin	Petits business	Secondaire	Chretien	Secondaire	Hopital	Bonne attitude
Masculin	Agriculteur	Secondaire	Chretien	Secondaire	Hopital	Bonne attitude
Masculin	Agriculteur	Secondaire	Chretien	Secondaire	Hopital	Bonne attitude
Masculin	Petits business	Secondaire	Chretien	Secondaire	Automédication	Mauvaise attitude
Masculin	Agriculteur	Secondaire	Chretien	Secondaire	Automédication	Mauvaise attitude
Féminin	fonctionnaire	Secondaire	Chretien	Secondaire	Hopital	Bonne attitude
Masculin	Agriculteur	Primaire	Chretien	Primaire	Automédication	Mauvaise attitude
Féminin	Ménagère	Primaire	Chretien	Secondaire	Automédication	Mauvaise attitude
Masculin	Agriculteur	Secondaire	Chretien	Secondaire	Pharmacopé	Mauvaise attitude
Féminin	Agriculteur	Primaire	Chretien	Primaire	Pharmacopé	Mauvaise attitude
Masculin	Petits business	Université	Chretien	Secondaire	Automédication	Mauvaise attitude
Féminin	Petits business	Sans niveau	Chretien	Sans niveau	Pharmacopé	Mauvaise attitude
Féminin	Petits business	Secondaire	Chretien	Secondaire	Pharmacopé	Mauvaise attitude
Féminin	Petits business	Primaire	Musulman	Primaire	Hopital	Bonne attitude
Féminin	Petits business	Secondaire	Chretien	Secondaire	Hopital	Bonne attitude
Masculin	Agriculteur	Secondaire	Chretien	Secondaire	Hopital	Bonne attitude
Masculin	Petits business	Primaire	Chretien	Primaire	Pharmacopé	Mauvaise attitude
Féminin	Ménagère	Secondaire	Chretien	Secondaire	Pharmacopé	Mauvaise attitude
Masculin	Petits business	Primaire	Chretien	Primaire	Hopital	Bonne attitude
Féminin	Ménagère	Primaire	Chretien	Primaire	Hopital	Bonne attitude
Masculin	Petits business	Sans niveau	Chretien	Sans niveau	Pharmacopé	Mauvaise attitude
Masculin	Petits business	Primaire	Paien	Primaire	Automédication	Mauvaise attitude
Masculin	student	Secondaire	Chretien	Secondaire	Hopital	Bonne attitude
Masculin	Agriculteur	Secondaire	Chretien	Secondaire	Automédication	Mauvaise attitude
Féminin	Ménagère	Secondaire	Chretien	Secondaire	Hopital	Bonne attitude
Féminin	Ménagère	Secondaire	Chretien	Secondaire	Automédication	Mauvaise attitude
Féminin	Ménagère	Université	Chretien	Universté	Hopital	Bonne attitude
Masculin	Agriculteur	Secondaire	Chretien	Secondaire	Pharmacopé	Mauvaise attitude
Féminin	Petits business	Secondaire	Chretien	Secondaire	Pharmacopé	Mauvaise attitude
Masculin	Agriculteur	Primaire	Chretien	Primaire	Hopital	Bonne attitude
Masculin	Agriculteur	Secondaire	Chretien	Secondaire	Hopital	Bonne attitude
Masculin	Petits business	Université	Chretien	Universté	Pharmacopé	Mauvaise attitude
Féminin	Petits business	Université	Chretien	Universté	Hopital	Bonne attitude
Féminin	Petits business	Primaire	Chretien	Secondaire	Pharmacopé	Mauvaise attitude
Féminin	Agriculteur	Primaire	Chretien	Primaire	Pharmacopé	Mauvaise attitude
Masculin	Agriculteur	Secondaire	Chretien	Secondaire	Pharmacopé	Mauvaise attitude
Masculin	Petits business	Secondaire	Musulman	Secondaire	Hopital	Bonne attitude
Masculin	Agriculteur	Université	Chretien	Universté	Automédication	Mauvaise attitude
Masculin	fonctionnaire	Secondaire	Chretien	Secondaire	Hopital	Bonne attitude
Féminin	Petits business	Sans niveau	Chretien	Secondaire	Hopital	Bonne attitude
Masculin	Petits business	Secondaire	Chretien	Secondaire	Hopital	Bonne attitude
Masculin	fonctionnaire	Secondaire	Chretien	Secondaire	Hopital	Bonne attitude
Masculin	Petits business	Secondaire	Chretien	Secondaire	Hopital	Bonne attitude
Féminin	Petits business	Primaire	Chretien	Primaire	Automédication	Mauvaise attitude
Masculin	fonctionnaire	Secondaire	Chretien	Secondaire	Automédication	Mauvaise attitude
Masculin	Agriculteur	Secondaire	Chretien	Secondaire	Hopital	Bonne attitude
Féminin	Petits business	Primaire	Chretien	Primaire	Automédication	Mauvaise attitude
Masculin	Agriculteur	Primaire	Chretien	Secondaire	Automédication	Mauvaise attitude
Féminin	Petits business	Secondaire	Chretien	Secondaire	Pharmacopé	Mauvaise attitude
Masculin	Agriculteur	Secondaire	Chretien	Secondaire	Automédication	Mauvaise attitude
Masculin	Petits business	Secondaire	Chretien	Universté	Hopital	Bonne attitude
Masculin	Agriculteur	Secondaire	Chretien	Secondaire	Automédication	Mauvaise attitude
Masculin	Agriculteur	Secondaire	Chretien	Secondaire	Pharmacopé	Mauvaise attitude
Masculin	Agriculteur	Secondaire	Chretien	Secondaire	Hopital	Bonne attitude
Féminin	fonctionnaire	Université	Chretien	Secondaire	Hopital	Bonne attitude
Masculin	Petits business	Secondaire	Chretien	Secondaire	Pharmacopé	Mauvaise attitude
Masculin	Petits business	Secondaire	Chretien	Secondaire	Pharmacopé	Mauvaise attitude
Masculin	Agriculteur	Secondaire	Chretien	Secondaire	Automédication	Mauvaise attitude
Féminin	Petits business	Secondaire	Chretien	Universté	RAS
Masculin	Petits business	Secondaire	Chretien	Secondaire	Automédication	Mauvaise attitude
Masculin	Petits business	Secondaire	Chretien	Secondaire	Hopital	Bonne attitude
Féminin	Petits business	Secondaire	Chretien	Secondaire	Hopital	Bonne attitude
Féminin	Petits business	Primaire	Chretien	Primaire	Automédication	Mauvaise attitude
Féminin	Ménagère	Secondaire	Chretien	Secondaire	Automédication	Mauvaise attitude
Masculin	Petits business	Secondaire	Chretien	Secondaire	Hopital	Bonne attitude
Masculin	student	Université	Chretien	Universté	Hopital	Bonne attitude
Masculin	Agriculteur	Secondaire	Chretien	Secondaire	Hopital	Bonne attitude
Féminin	fonctionnaire	Secondaire	Chretien	Secondaire	Hopital	Bonne attitude
Féminin	Petits business	Primaire	Chretien	Secondaire	Hopital	Bonne attitude
Masculin	Agriculteur	Université	Chretien	Secondaire	Hopital	Bonne attitude
Masculin	fonctionnaire	Secondaire	Chretien	Secondaire	Hopital	Bonne attitude
Féminin	Ménagère	Secondaire	Chretien	Secondaire	Automédication	Mauvaise attitude
Masculin	Petits business	Secondaire	Chretien	Secondaire	Automédication	Mauvaise attitude
Masculin	Agriculteur	Université	Chretien	Universté	Automédication	Mauvaise attitude
Masculin	Petits business	Secondaire	Chretien	Secondaire	Pharmacopé	Mauvaise attitude
Masculin	Agriculteur	Secondaire	Chretien	Secondaire	Automédication	Mauvaise attitude
Masculin	Agriculteur	Primaire	Chretien	Primaire	Pharmacopé	Mauvaise attitude
Masculin	Ménagère	Primaire	Chretien	Primaire	Automédication	Mauvaise attitude
Masculin	Petits business	Secondaire	Chretien	Secondaire	Hopital	Bonne attitude
Masculin	fonctionnaire	Université	Chretien	Universté	Hopital	Bonne attitude
Masculin	Petits business	Secondaire	Chretien	Universté	Automédication	Mauvaise attitude
Masculin	Agriculteur	Primaire		Primaire	Hopital	Bonne attitude
Masculin	Agriculteur	Secondaire	Chretien	Secondaire	Automédication	Mauvaise attitude
Féminin	Petits business	Secondaire	Chretien	Secondaire	Pharmacopé	Mauvaise attitude
Masculin	Petits business	Secondaire	Chretien	Secondaire	Pharmacopé	Mauvaise attitude
Masculin	Agriculteur	Secondaire	Chretien	Secondaire	Hopital	Bonne attitude
Masculin	Agriculteur	Secondaire	Chretien	Secondaire	Automédication	Mauvaise attitude
Masculin	Petits business	Primaire	Musulman	Primaire	Hopital	Bonne attitude
Masculin	Agriculteur	Primaire	Chretien	Primaire	Automédication	Mauvaise attitude
Masculin	Agriculteur	Secondaire	Chretien	Secondaire	Hopital	Bonne attitude
Féminin	Agriculteur	Secondaire	Chretien	Secondaire	Hopital	Bonne attitude
Masculin	Agriculteur	Primaire	Chretien	Primaire	Automédication	Mauvaise attitude
Masculin	Agriculteur	Secondaire	Chretien	Secondaire	Automédication	Mauvaise attitude
Féminin	Petits business	Primaire	Chretien	Primaire	Automédication	Mauvaise attitude
Masculin	Agriculteur	Primaire	Paien	Primaire	Automédication	Mauvaise attitude
Féminin	Agriculteur	Primaire	Chretien	Primaire	Automédication	Mauvaise attitude
Masculin	Agriculteur	Primaire	Chretien	Primaire	Hopital	Bonne attitude
Féminin	Agriculteur	Secondaire	Chretien	Secondaire	Hopital	Bonne attitude
Masculin	Petits business	Secondaire	Chretien	Secondaire	Hopital	Bonne attitude
Masculin	Agriculteur	Secondaire	Chretien	Secondaire	Hopital	Bonne attitude
Masculin	Agriculteur	Secondaire	Chretien	Secondaire	Hopital	Bonne attitude
Féminin	Agriculteur	Secondaire	Chretien	Secondaire	Hopital	Bonne attitude
Féminin	Agriculteur	Primaire	Chretien	Primaire	Hopital	Bonne attitude
Masculin	fonctionnaire	Université	Chretien	Universté	Automédication	Mauvaise attitude
Masculin	Agriculteur	Secondaire	Chretien	Secondaire	Pharmacopé	Mauvaise attitude
Masculin	Petits business	Secondaire	Chretien	Secondaire	Automédication	Mauvaise attitude
Masculin	Agriculteur	Primaire	Chretien	Primaire	Pharmacopé	Mauvaise attitude
Masculin	Agriculteur	Secondaire	Chretien	Secondaire	Pharmacopé	Mauvaise attitude
Masculin	Petits business	Primaire	Chretien	Primaire	Automédication	Mauvaise attitude
Masculin	Petits business	Primaire	Chretien	Primaire	Automédication	Mauvaise attitude
Féminin	Petits business	Primaire	Chretien	Primaire	Hopital	Bonne attitude
Masculin	Agriculteur	Primaire	Chretien	Primaire	Automédication	Mauvaise attitude
Masculin	Petits business	Secondaire	Chretien	Secondaire	Hopital	Bonne attitude
Féminin	fonctionnaire	Secondaire	Chretien	Secondaire	Automédication	Mauvaise attitude
Masculin	fonctionnaire	Secondaire	Chretien	Secondaire	Hopital	Bonne attitude
Masculin	fonctionnaire	Université	Chretien	Universté	Automédication	Mauvaise attitude
Masculin	Agriculteur	Université	Chretien	Secondaire	Pharmacopé	Mauvaise attitude
Masculin	Petits business	Secondaire	Chretien	Secondaire	Hopital	Bonne attitude
Masculin	Petits business	Primaire	Musulman	Primaire	Pharmacopé	Mauvaise attitude
Masculin	Petits business	Primaire	Musulman	Primaire	Pharmacopé	Mauvaise attitude
Masculin	Petits business	Secondaire	Chretien	Secondaire	Hopital	Bonne attitude
Masculin	Petits business	Secondaire	Chretien	Secondaire	Pharmacopé	Mauvaise attitude
Masculin	fonctionnaire	Université	Chretien	Universté	Hopital	Bonne attitude
Féminin	Ménagère	Primaire	Chretien	Primaire	Automédication	Mauvaise attitude
Féminin	Ménagère	Secondaire	Chretien	Universté	Automédication	Mauvaise attitude
Masculin	Agriculteur	Secondaire	Chretien	Secondaire	Hopital	Bonne attitude
Masculin	Ménagère	Secondaire	Paien	Secondaire	Automédication	Mauvaise attitude
Féminin	fonctionnaire	Secondaire	Chretien	Secondaire	Hopital	Bonne attitude
Masculin	Agriculteur	Secondaire	Chretien	Secondaire	Pharmacopé	Mauvaise attitude
Masculin	Petits business	Secondaire	Chretien	Secondaire	Hopital	Bonne attitude
Féminin	Petits business	Secondaire	Chretien	Secondaire	Pharmacopé	Mauvaise attitude
Féminin	Agriculteur	Secondaire	Chretien	Secondaire	Hopital	Bonne attitude
Masculin	Petits business	Secondaire	Chretien	Secondaire	Hopital	Bonne attitude
Masculin	Petits business	Secondaire	Chretien	Secondaire	Hopital	Bonne attitude
Masculin	fonctionnaire	Secondaire	Chretien	Secondaire	Automédication	Mauvaise attitude
Féminin	fonctionnaire	Université	Chretien	Universté	Hopital	Bonne attitude
Masculin	Petits business	Secondaire	Chretien	Secondaire	Hopital	Bonne attitude
Masculin	Agriculteur	Primaire	Chretien	Secondaire	Hopital	Bonne attitude
Féminin	Petits business	Secondaire	Chretien	Secondaire	Hopital	Bonne attitude
Masculin	Agriculteur	Secondaire	Chretien	Universté	Automédication	Mauvaise attitude
Féminin	Agriculteur	Primaire	Chretien	Secondaire	Automédication	Mauvaise attitude
Masculin	fonctionnaire	Secondaire	Chretien	Secondaire	Hopital	Bonne attitude
Féminin	Ménagère	Secondaire	Chretien	Secondaire	Hopital	Bonne attitude
Masculin	Agriculteur	Secondaire	Chretien	Secondaire	Hopital	Bonne attitude
Masculin	Agriculteur	Primaire	Chretien	Universté	Hopital	Bonne attitude
Masculin	Petits business	Secondaire	Chretien	Secondaire	Hopital	Bonne attitude
Féminin	Petits business	Secondaire	Chretien	Secondaire	Automédication	Mauvaise attitude
Masculin	Petits business	Université	Chretien	Universté	Automédication	Mauvaise attitude
Féminin	fonctionnaire	Secondaire	Chretien	Secondaire	Hopital	Bonne attitude
Masculin	Agriculteur	Primaire	Chretien	Universté	Automédication	Mauvaise attitude
Masculin	Agriculteur	Secondaire	Chretien	Secondaire	Hopital	Bonne attitude
Masculin	fonctionnaire	Université	Chretien	Secondaire	Pharmacopé	Mauvaise attitude
Féminin	Ménagère	Primaire	Chretien	Secondaire	Hopital	Bonne attitude
Féminin	Petits business	Secondaire	Chretien	Secondaire	Hopital	Bonne attitude
Masculin	Agriculteur	Secondaire	Chretien	Secondaire	Hopital	Bonne attitude
Féminin	Ménagère	Secondaire	Chretien	Secondaire	Hopital	Bonne attitude
Masculin	Petits business	Secondaire	Chretien	Secondaire	Pharmacopé	Mauvaise attitude
Masculin	Agriculteur	Secondaire	Chretien	Secondaire	Hopital	Bonne attitude
Masculin	Agriculteur	Primaire	Chretien	Primaire	Automédication	Mauvaise attitude
Masculin	fonctionnaire	Université	Chretien	Universté	Hopital	Bonne attitude
Masculin	fonctionnaire	Université	Chretien	Secondaire	Hopital	Bonne attitude
Féminin	Ménagère	Primaire	Chretien	Secondaire	Pharmacopé	Mauvaise attitude
Féminin	Petits business	Secondaire	Chretien	Secondaire	Automédication	Mauvaise attitude
Masculin	fonctionnaire	Secondaire	Chretien	Secondaire	Pharmacopé	Mauvaise attitude
Féminin	fonctionnaire	Secondaire	Chretien	Secondaire	Hopital	Bonne attitude
Féminin	Ménagère	Secondaire	Chretien	Secondaire	Pharmacopé	Mauvaise attitude
Féminin	Petits business	Secondaire	Chretien	Secondaire	Hopital	Bonne attitude
Masculin	fonctionnaire	Université	Chretien	Universté	Hopital	Bonne attitude
Masculin	Petits business	Secondaire	Chretien	Secondaire	Automédication	Mauvaise attitude
Masculin	Petits business	Secondaire	Chretien	Secondaire	Pharmacopé	Mauvaise attitude
Masculin	Petits business	Primaire	Chretien	Secondaire	Pharmacopé	Mauvaise attitude
Masculin	fonctionnaire	Secondaire	Chretien	Secondaire	Hopital	Bonne attitude
